# Supplementary material for: Copper-catalyzed syn-hydroformylation of alkynes with silanes and N,N-dimethylformamide dimethylacetal
Source: Royal Society of Chemistry journal article supplement (doi:10.1039/d4ob00724g), 2024-01-01

## Electronic Supporting Information

### Copper-catalyzed *syn*-hydroformylation of alkynes with silanes and *N,N*-dimethylformamide dimethylacetal

Menglin Huai,<sup>a</sup> Long Chen,<sup>a</sup> Wei Dong,<sup>a</sup> Weijie Wang,<sup>a</sup> Zhen Qin,<sup>a</sup> Kaifeng Dai,<sup>a</sup> Yuan Li,<sup>a</sup> Xiulian Zhang<sup>a</sup>  
and Chuanzhou Tao<sup>\*a,b</sup>

<sup>a</sup> School of Environmental and Chemical Engineering, Jiangsu Ocean University, Lianyungang 222005, China.

<sup>b</sup> Jiangsu Province Engineering Research Center of Visible Light Catalytic Materials, Lianyungang Technical College, Lianyungang 222000, China.

#### Contents

|                                                           |    |
|-----------------------------------------------------------|----|
| 1. NMR spectra of the catalysts.....                      | 2  |
| 2. NMR spectra of the substrates ( <b>1</b> ).....        | 6  |
| 3. NMR spectra of the products ( <b>3</b> ).....          | 20 |
| 4. NMR spectra of 1,2-di- <i>p</i> -tolylethan-1-one..... | 52 |
| 5. NMR spectra of the control experimental .....          | 53 |

## 1. NMR spectra of the catalysts

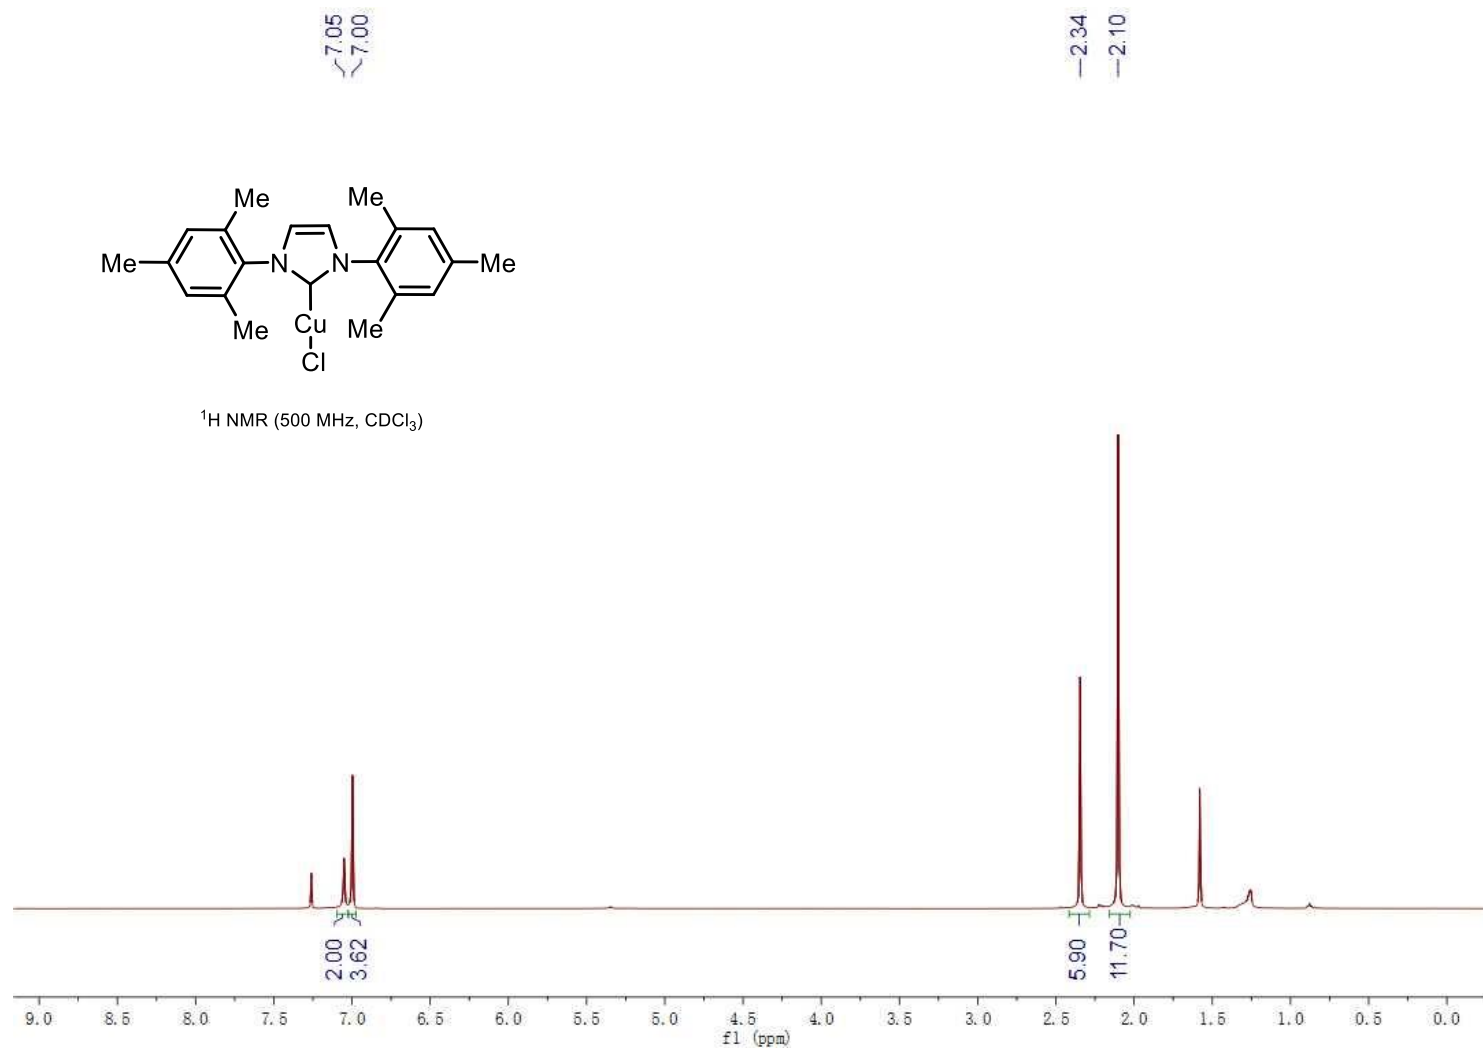

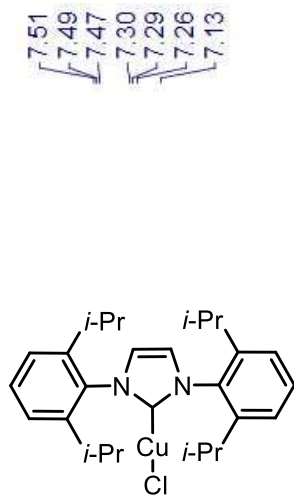

$^1\text{H NMR}$  (500 MHz,  $\text{CDCl}_3$ )

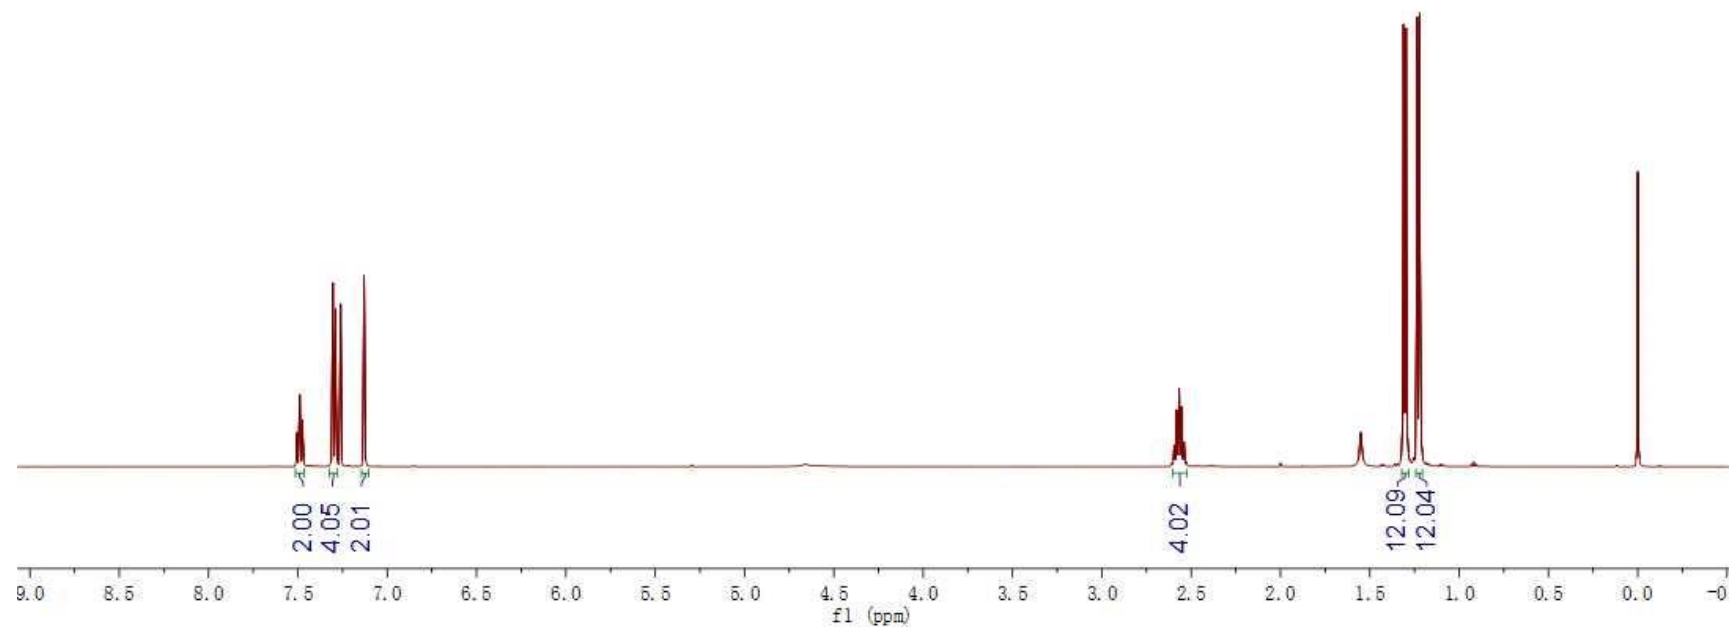

2.58  
2.57  
2.55

1.31  
1.30  
1.23  
1.22

-0.00

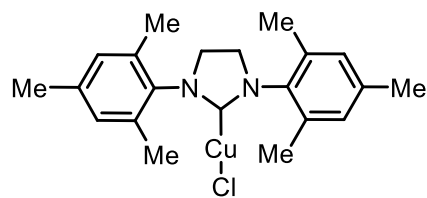

$^1\text{H}$  NMR (500 MHz,  $\text{CDCl}_3$ )

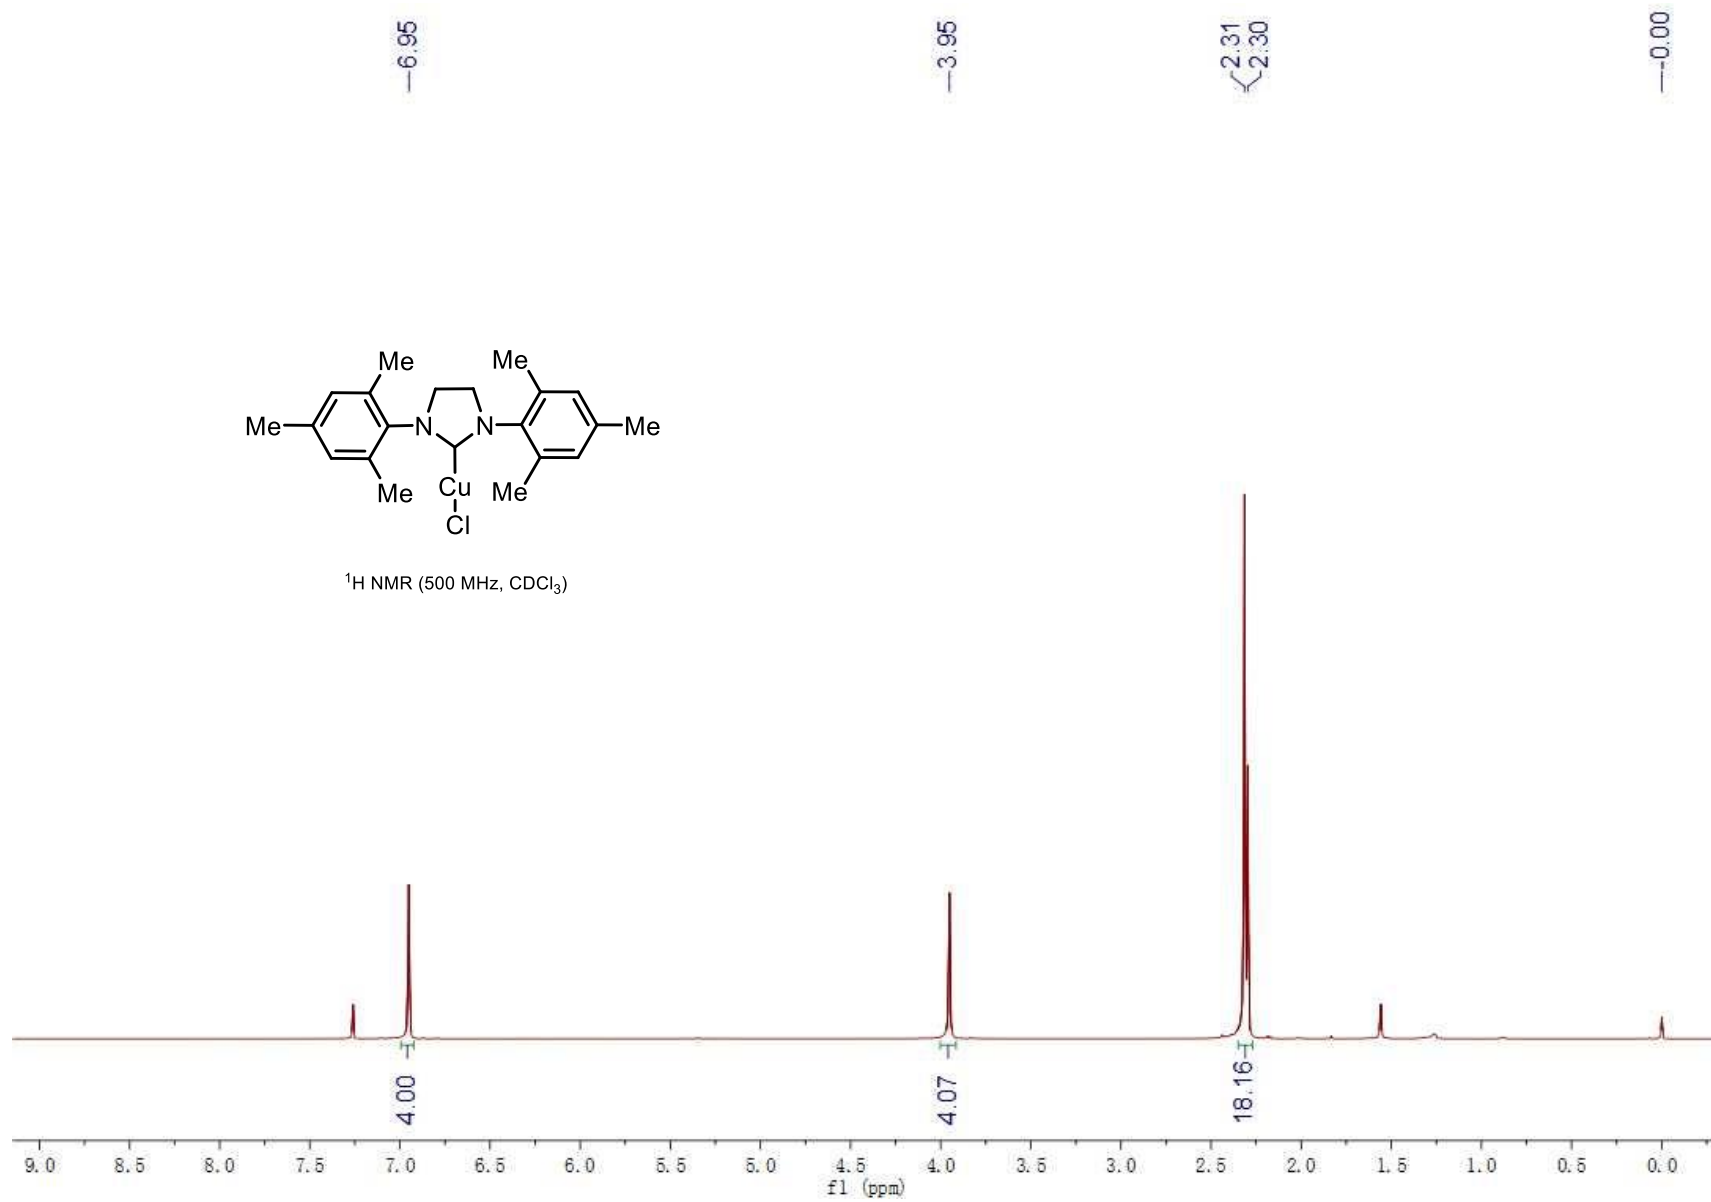

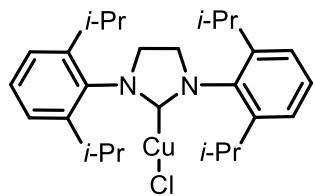

$^1\text{H}$  NMR (500 MHz,  $\text{CDCl}_3$ )

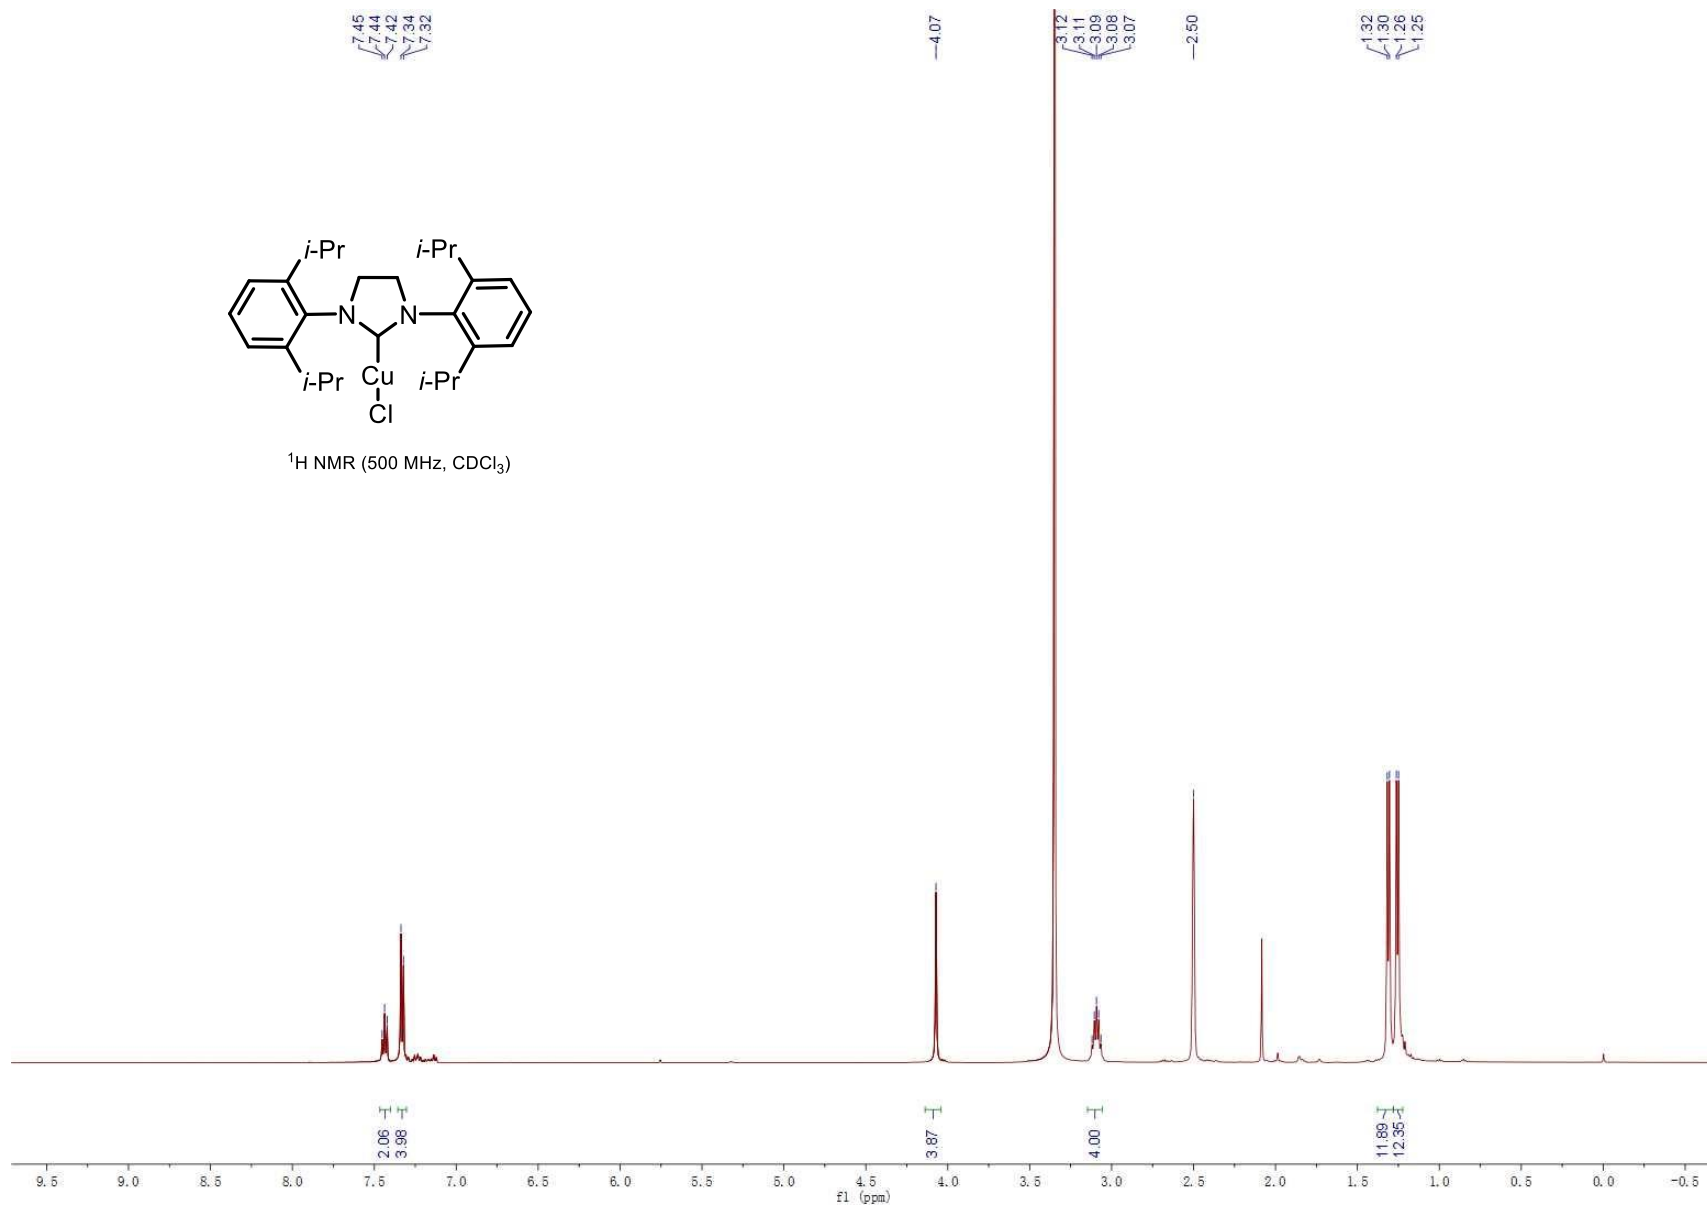

## 2. NMR spectra of the substrates (1)

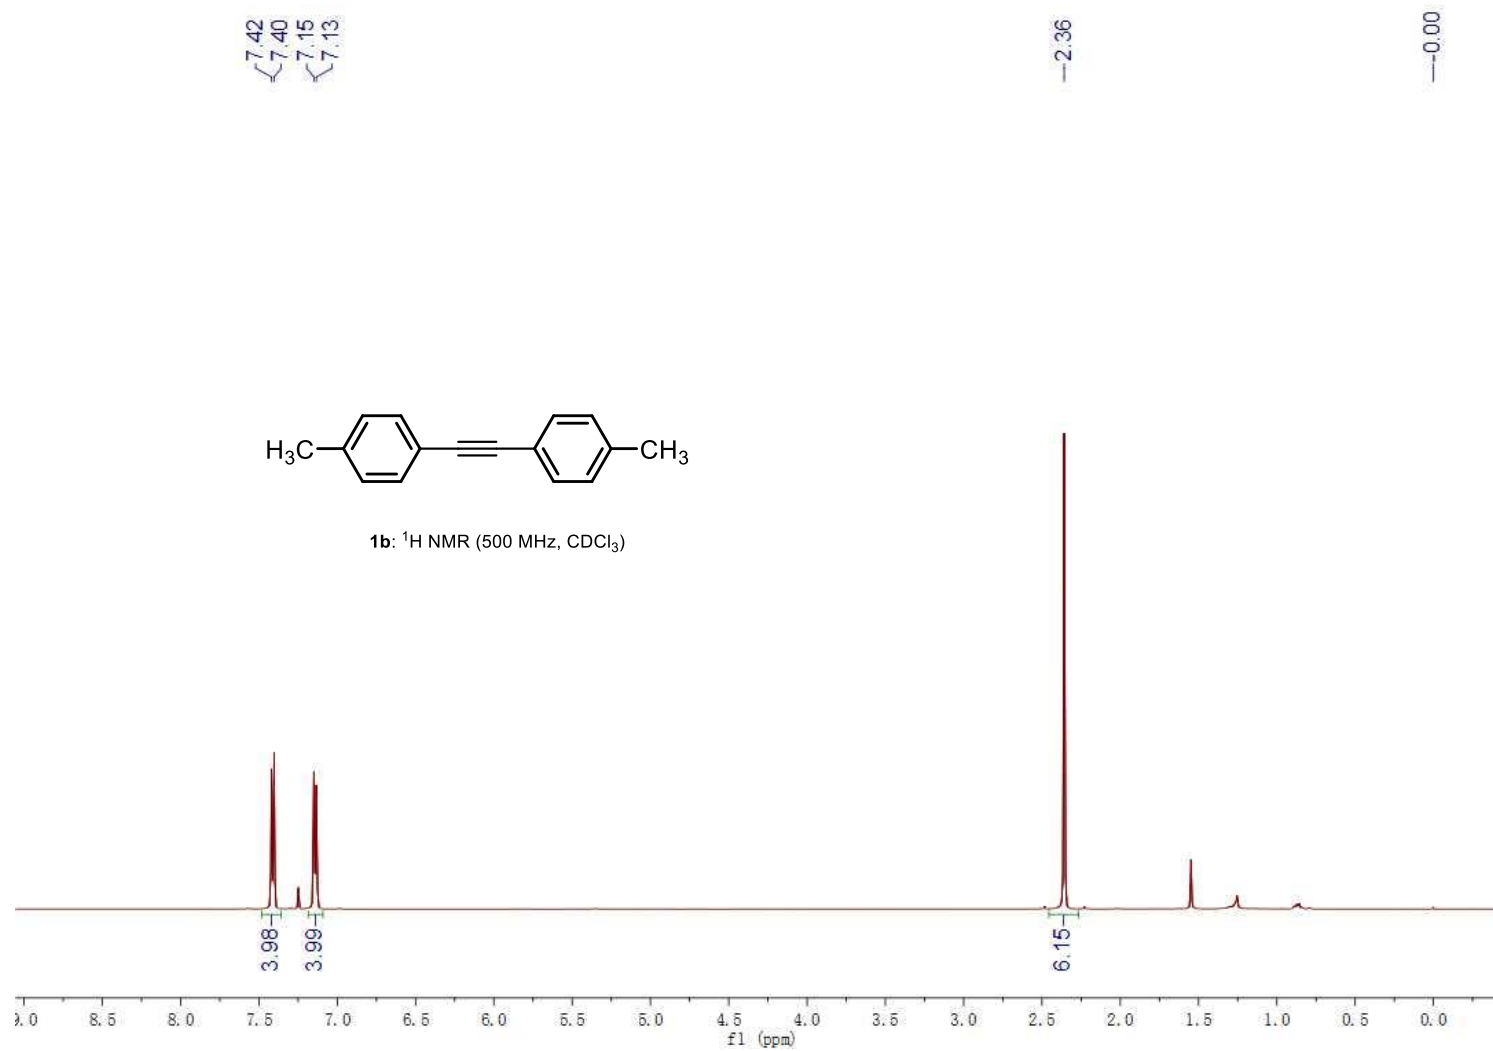

7.51  
7.50  
7.49  
7.48  
7.06  
7.04  
7.02

—0.00

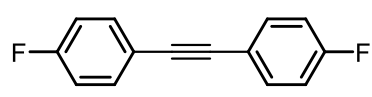

1c: <sup>1</sup>H NMR (500 MHz, CDCl<sub>3</sub>)

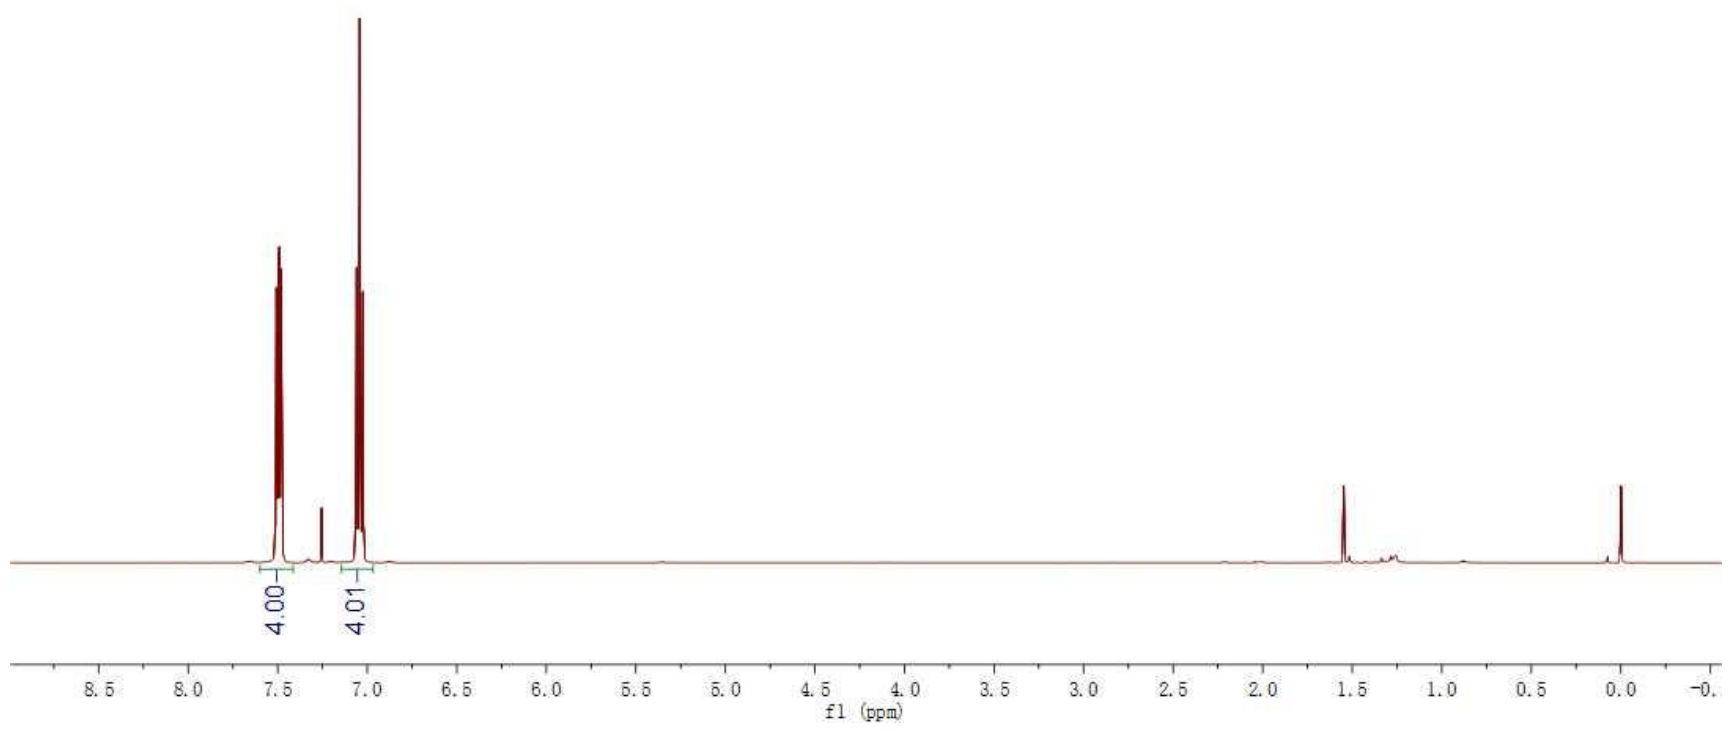

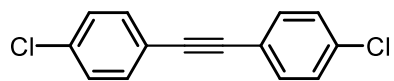

1d:  $^1\text{H}$  NMR (500 MHz,  $\text{CDCl}_3$ )

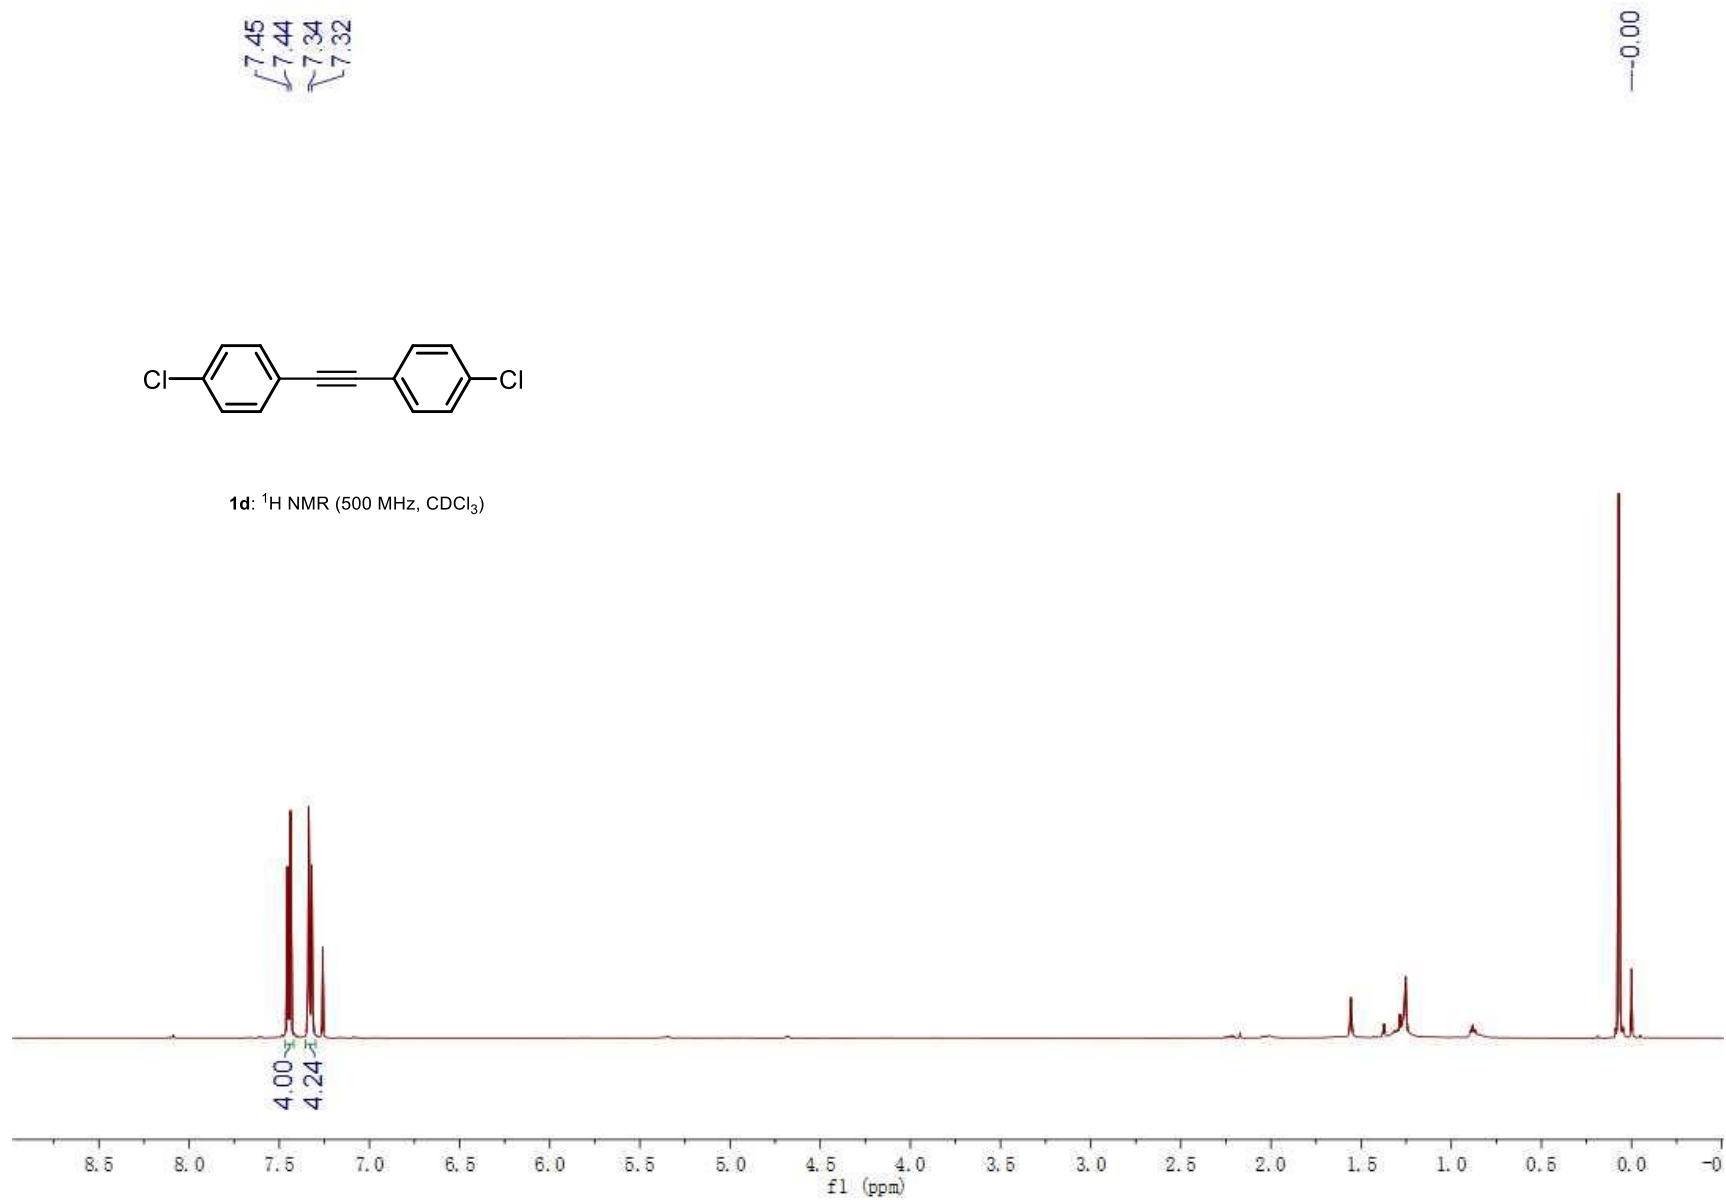



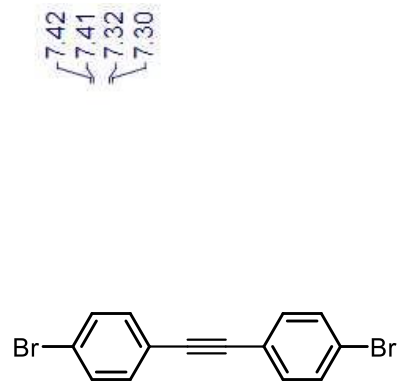

1e:  $^1\text{H}$  NMR (500 MHz,  $\text{CDCl}_3$ )

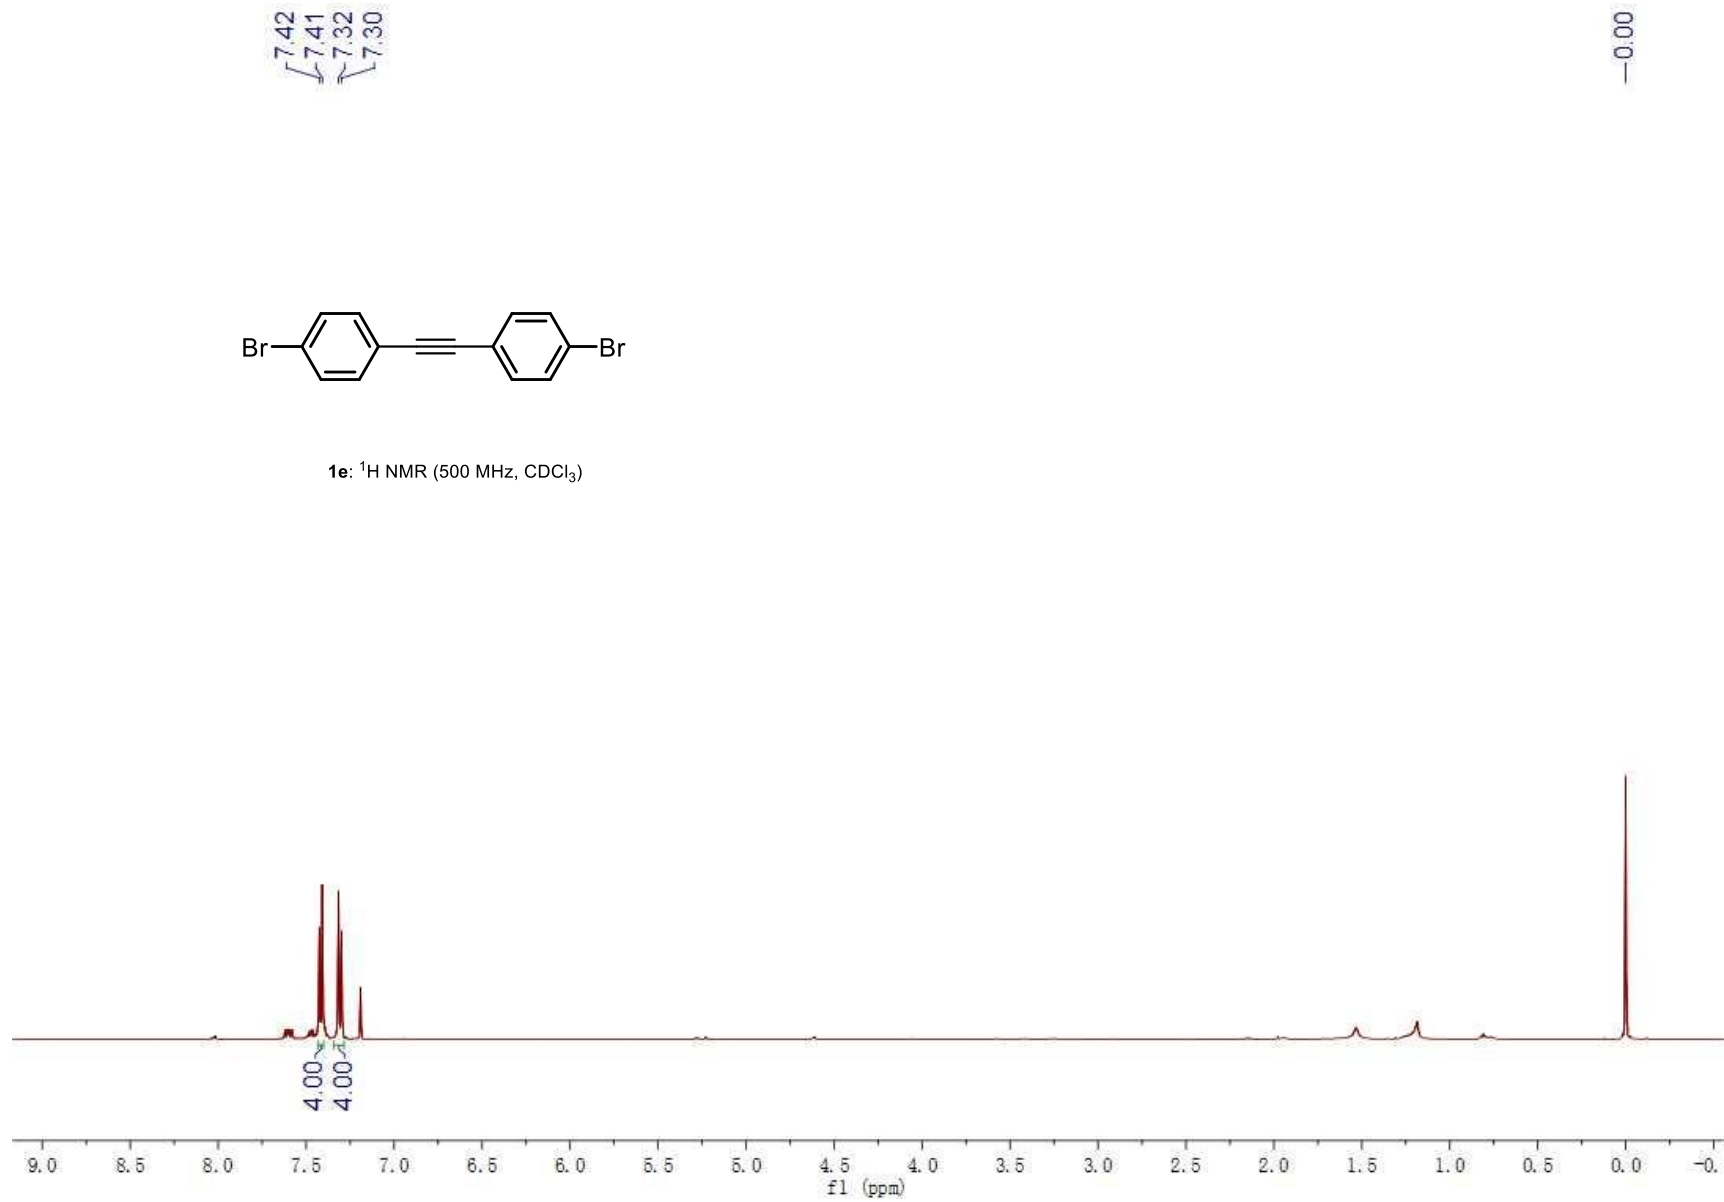

7.66  
7.64  
7.63  
7.61

0.00

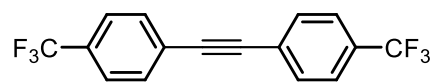

1f: <sup>1</sup>H NMR (500 MHz, CDCl<sub>3</sub>)

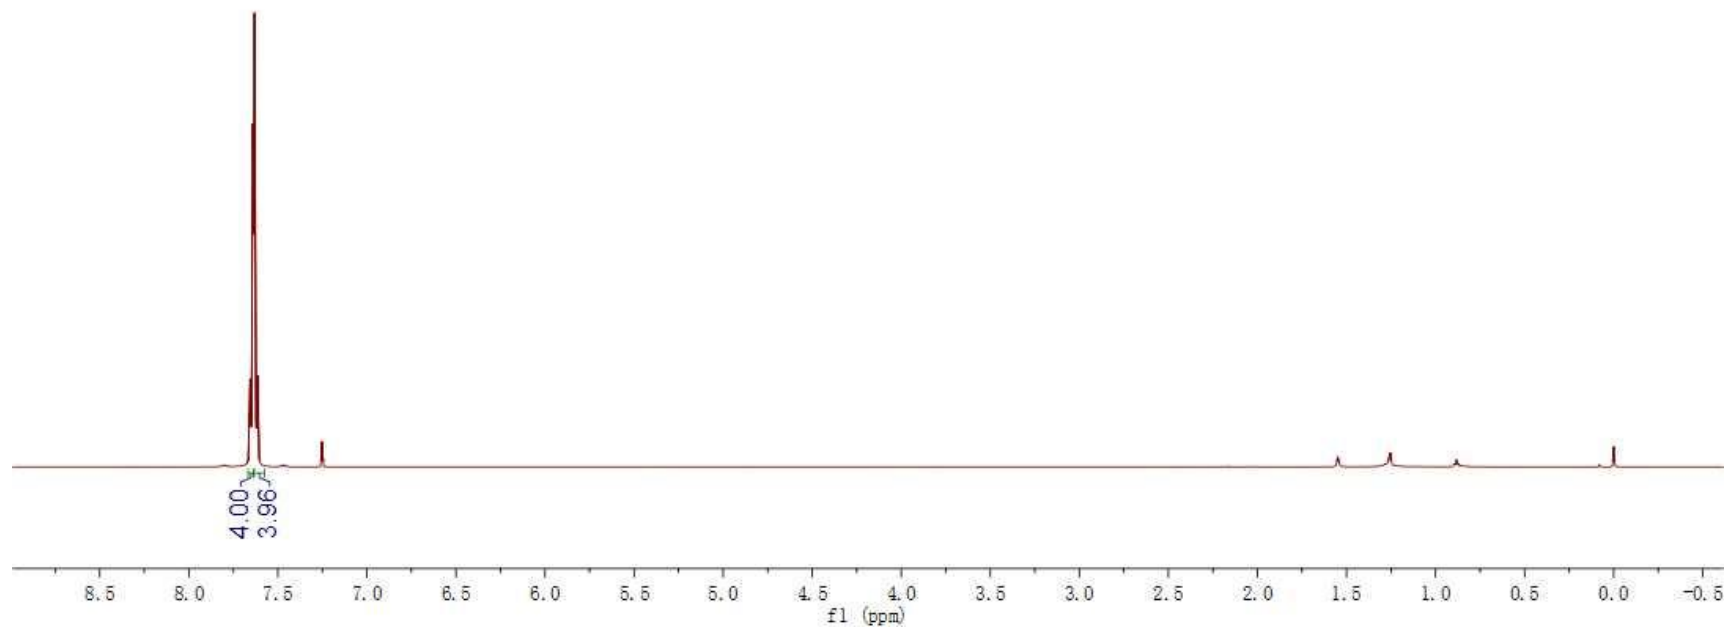

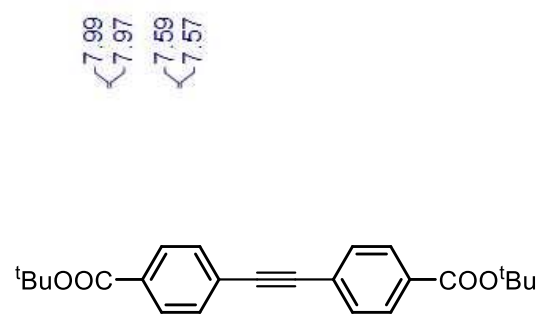

1g: <sup>1</sup>H NMR (500 MHz, CDCl<sub>3</sub>)

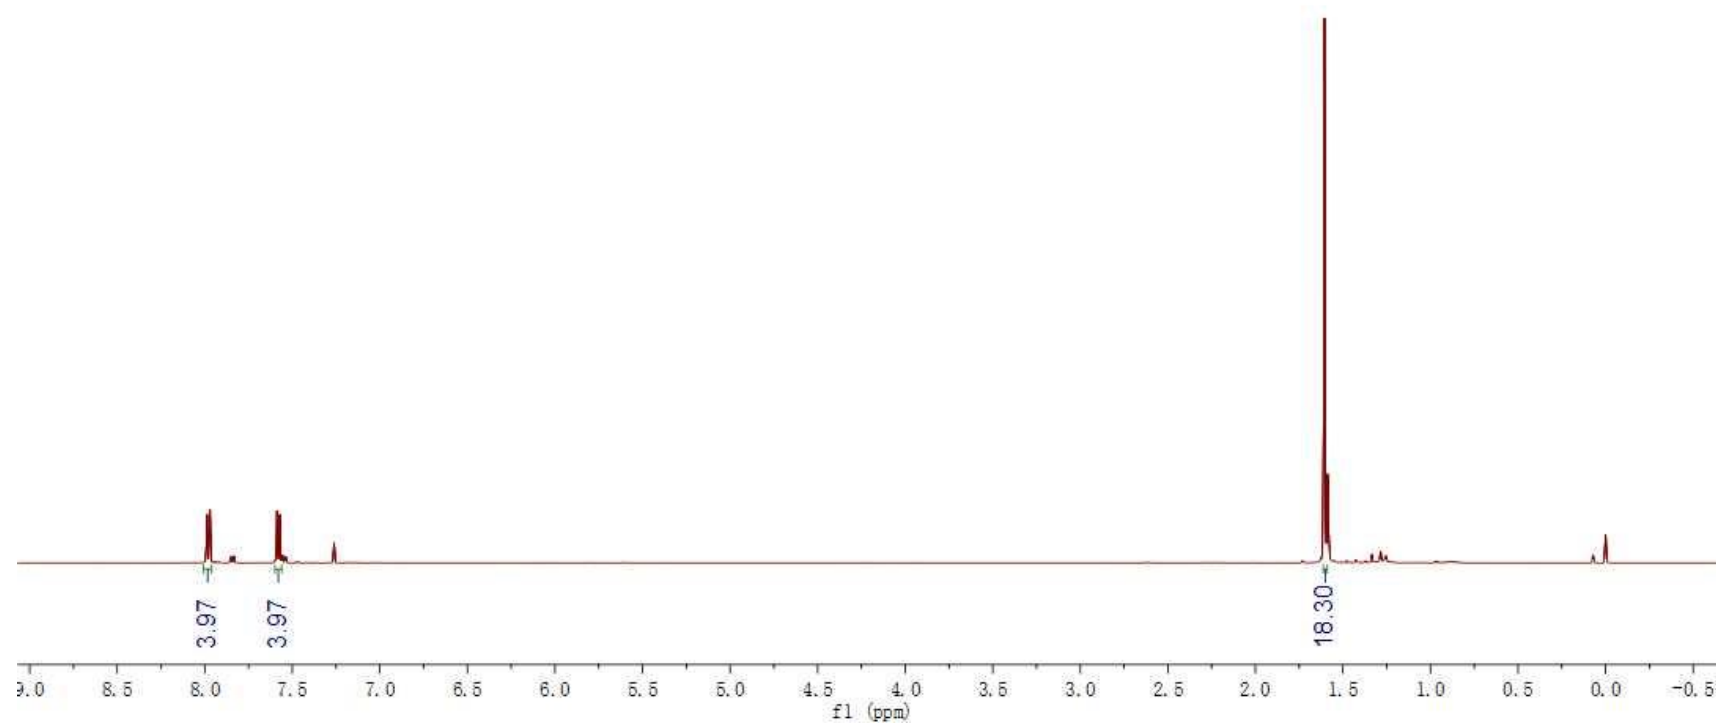

7.34  
7.33  
7.32  
7.22  
7.20  
7.19  
7.12  
7.10

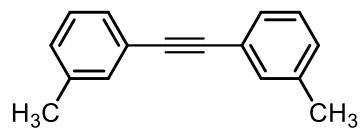

1h: <sup>1</sup>H NMR (500 MHz, CDCl<sub>3</sub>)

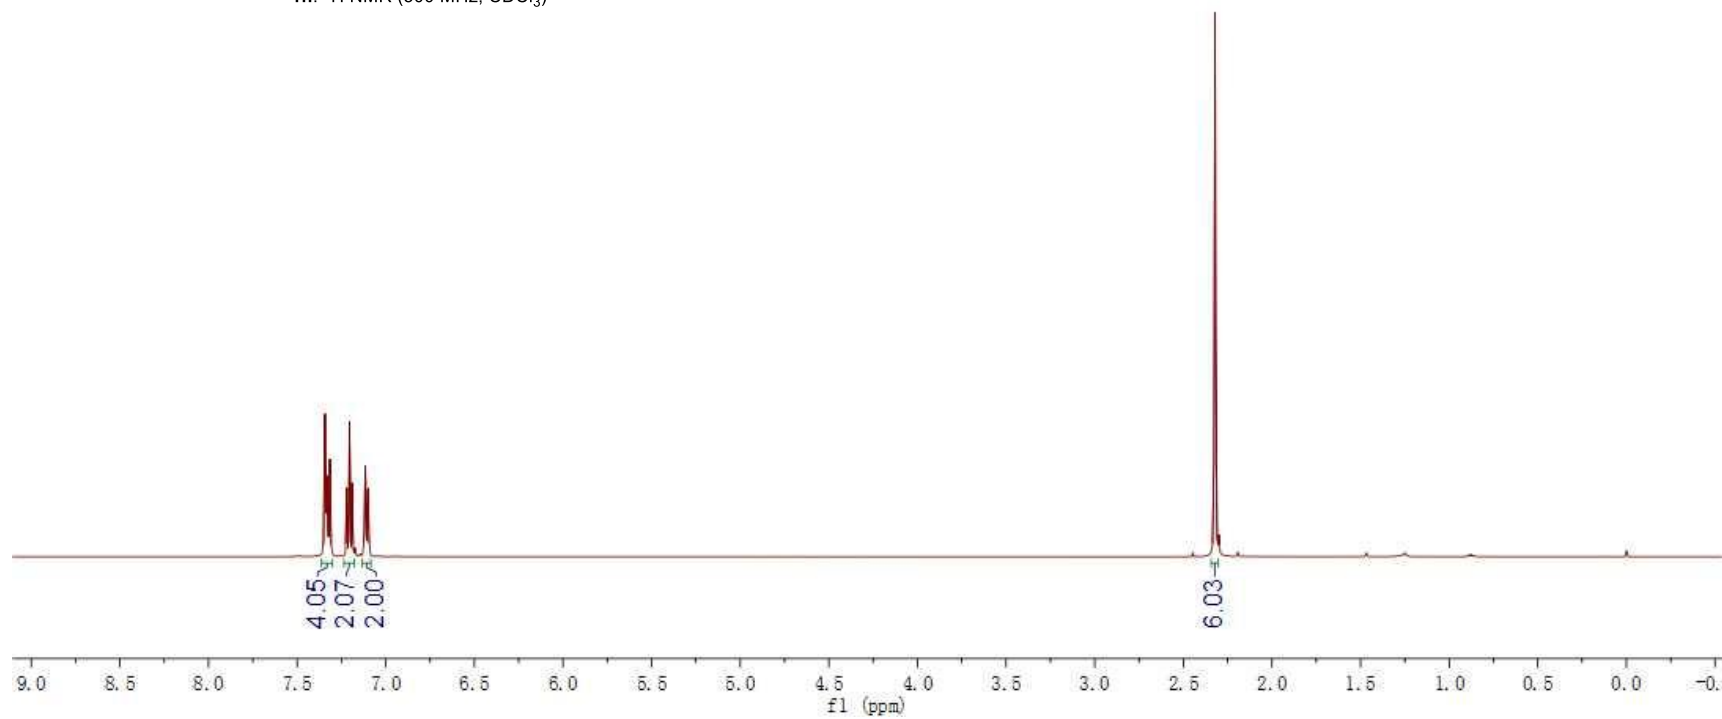

7.50  
7.50  
7.50  
7.39  
7.39  
7.38  
7.38  
7.32  
7.32  
7.32  
7.31  
7.30  
7.30  
7.28  
7.26  
7.24  
7.24

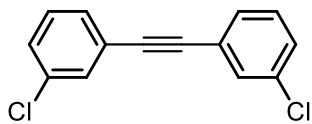

1i: <sup>1</sup>H NMR (500 MHz, CDCl<sub>3</sub>)

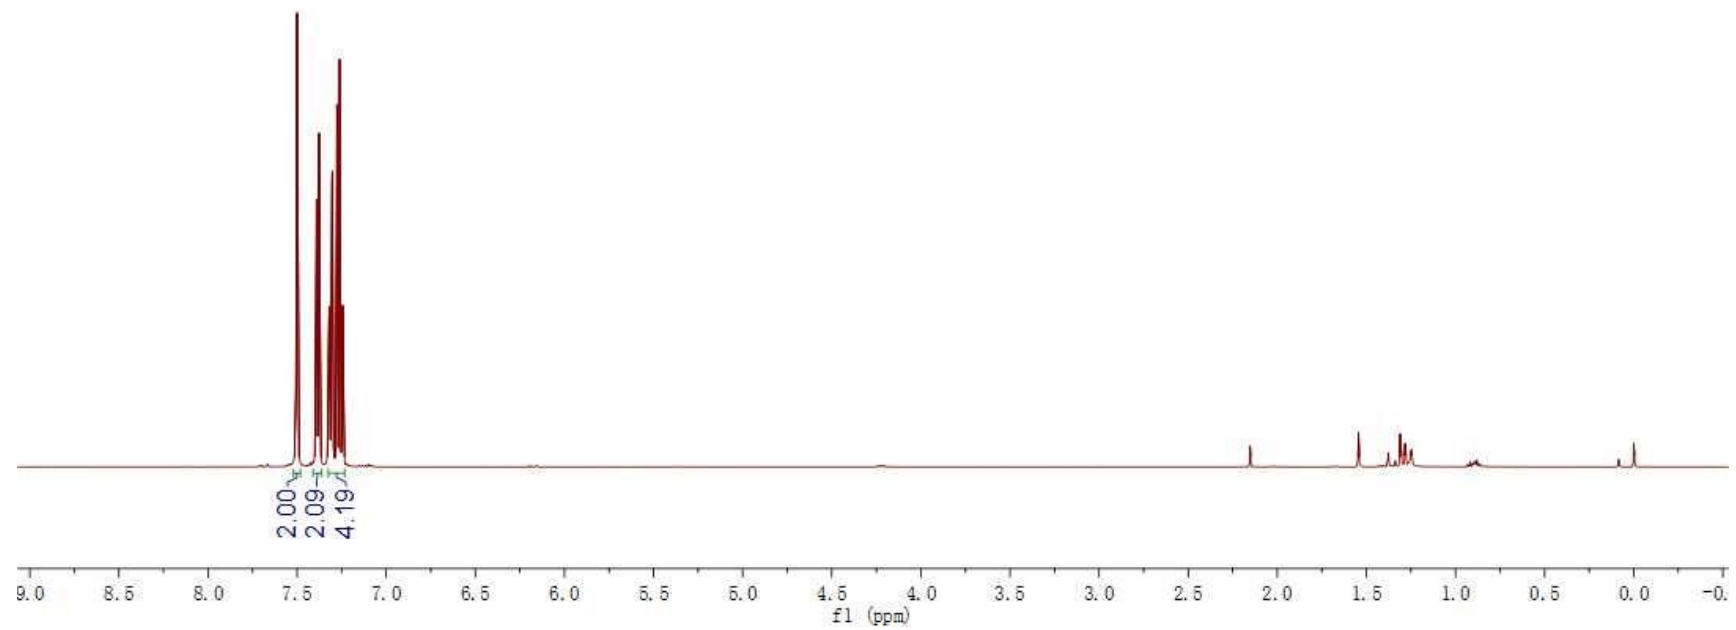

7.81  
7.72  
7.70  
7.62  
7.61  
7.52  
7.50  
7.48  
7.26

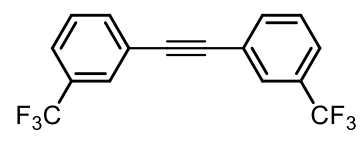

1j: <sup>1</sup>H NMR (500 MHz, CDCl<sub>3</sub>)

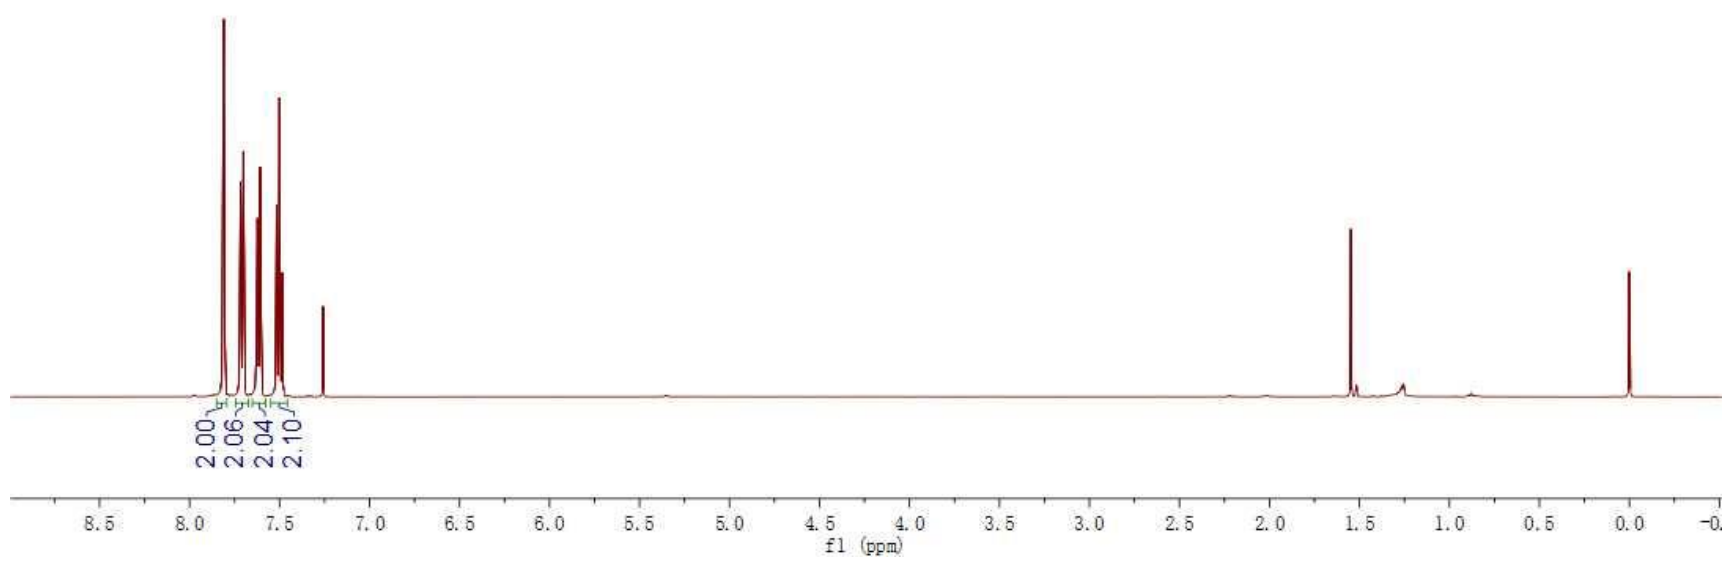

7.82  
7.76  
7.75  
7.67  
7.65  
7.53  
7.51  
7.50

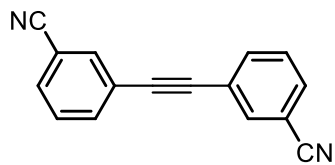

1K: <sup>1</sup>H NMR (500 MHz, CDCl<sub>3</sub>)

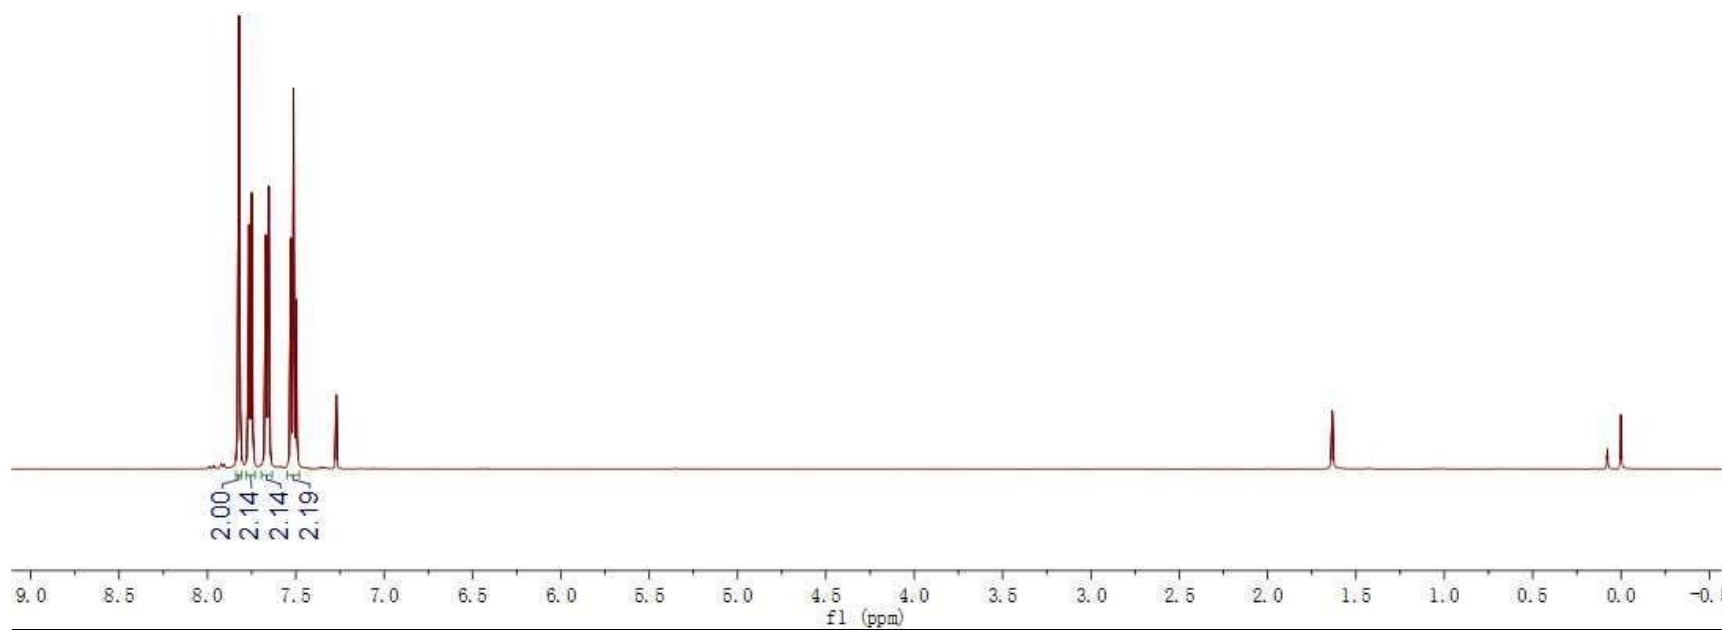

7.52  
7.50  
7.24  
7.23  
7.23  
7.21  
7.19  
7.18  
7.17  
7.16

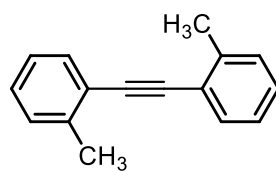

11: <sup>1</sup>H NMR (500 MHz, CDCl<sub>3</sub>)

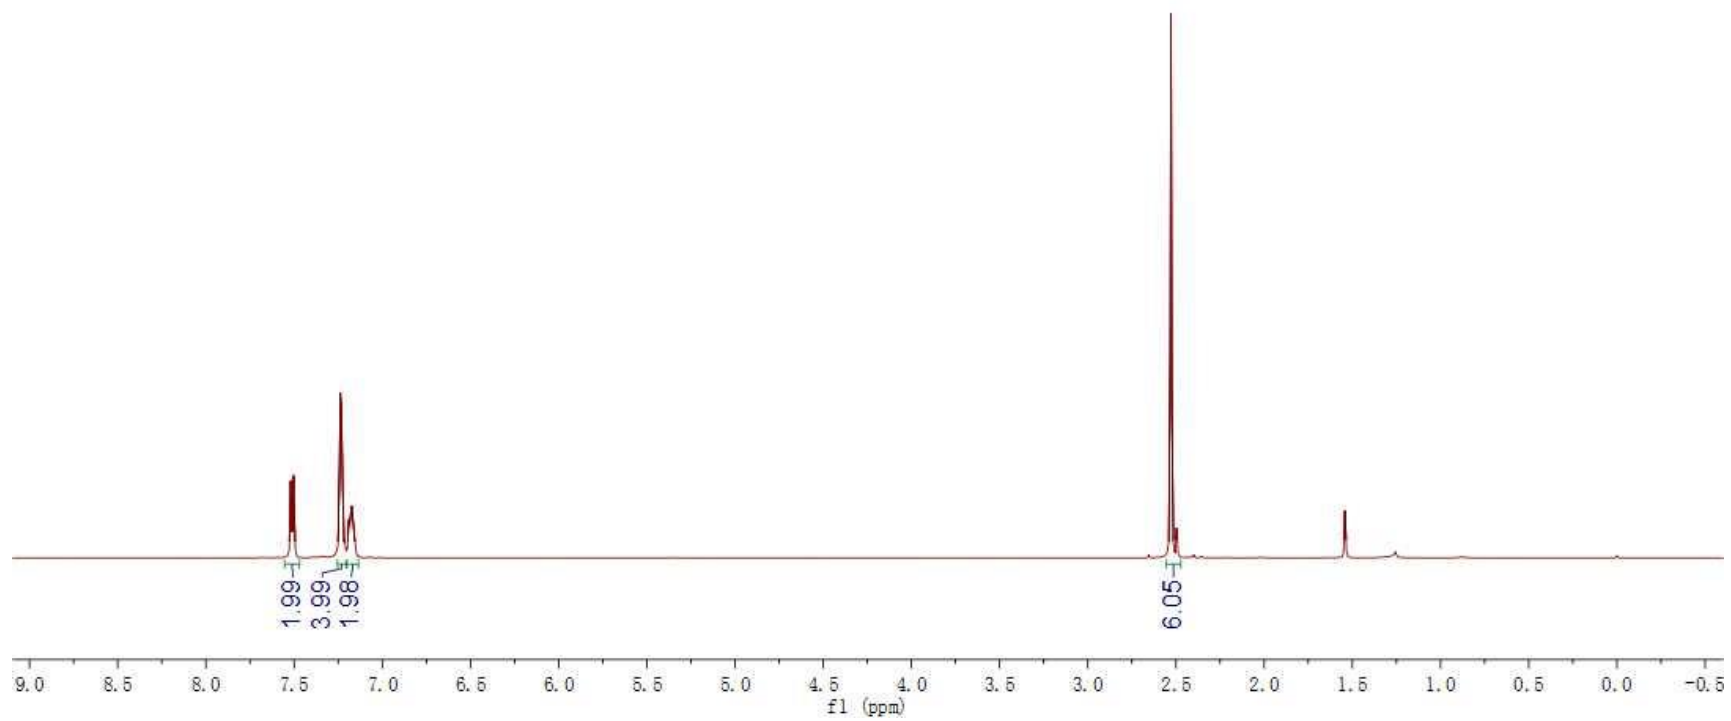



7.54  
7.54  
7.53  
7.52  
7.37  
7.37  
7.36  
7.36  
7.23  
7.22  
7.21  
7.21  
7.20  
7.19  
7.19  
7.18  
7.18  
7.16  
7.16

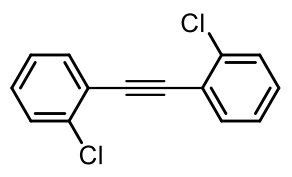

1m: <sup>1</sup>H NMR (500 MHz, CDCl<sub>3</sub>)

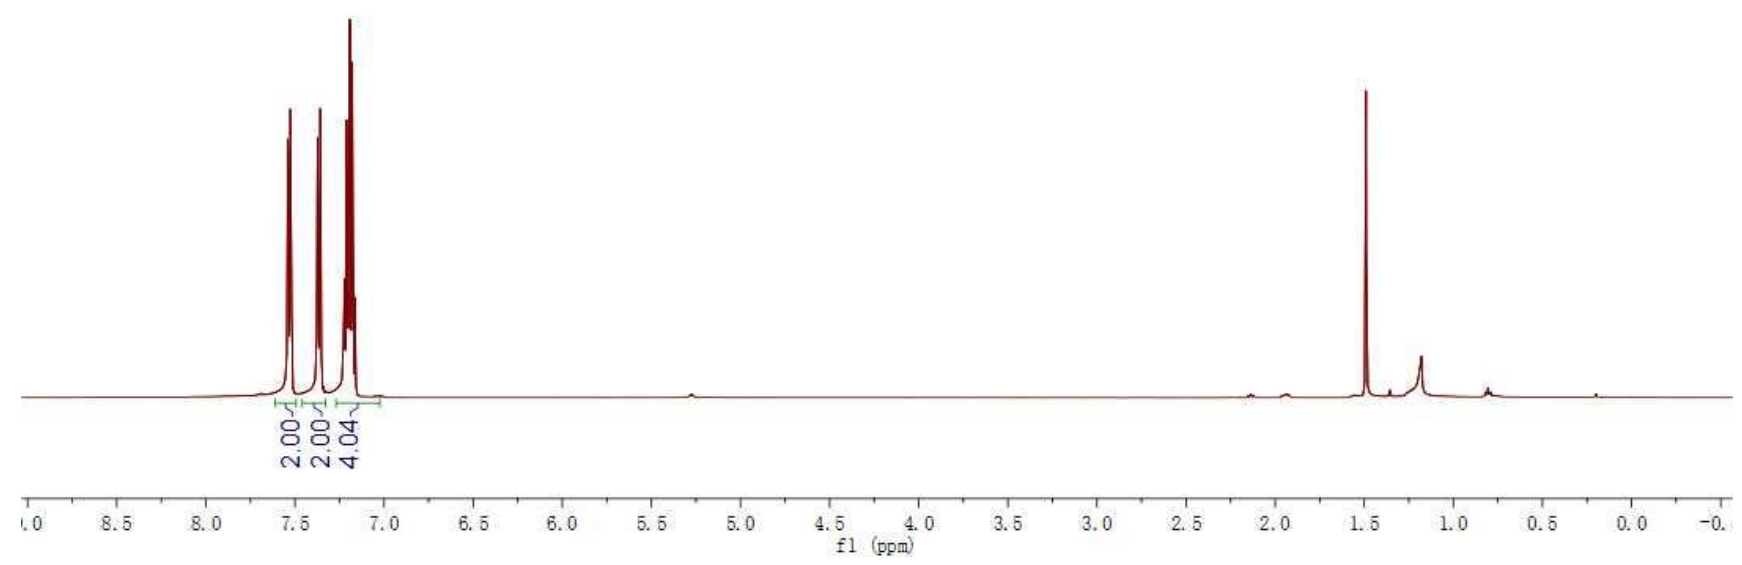

7.31  
7.30  
7.28  
7.28  
7.27  
7.25  
7.02  
7.01  
7.01  
7.00

0.00

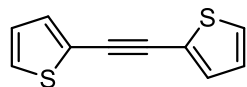

1n: <sup>1</sup>H NMR (500 MHz, CDCl<sub>3</sub>)

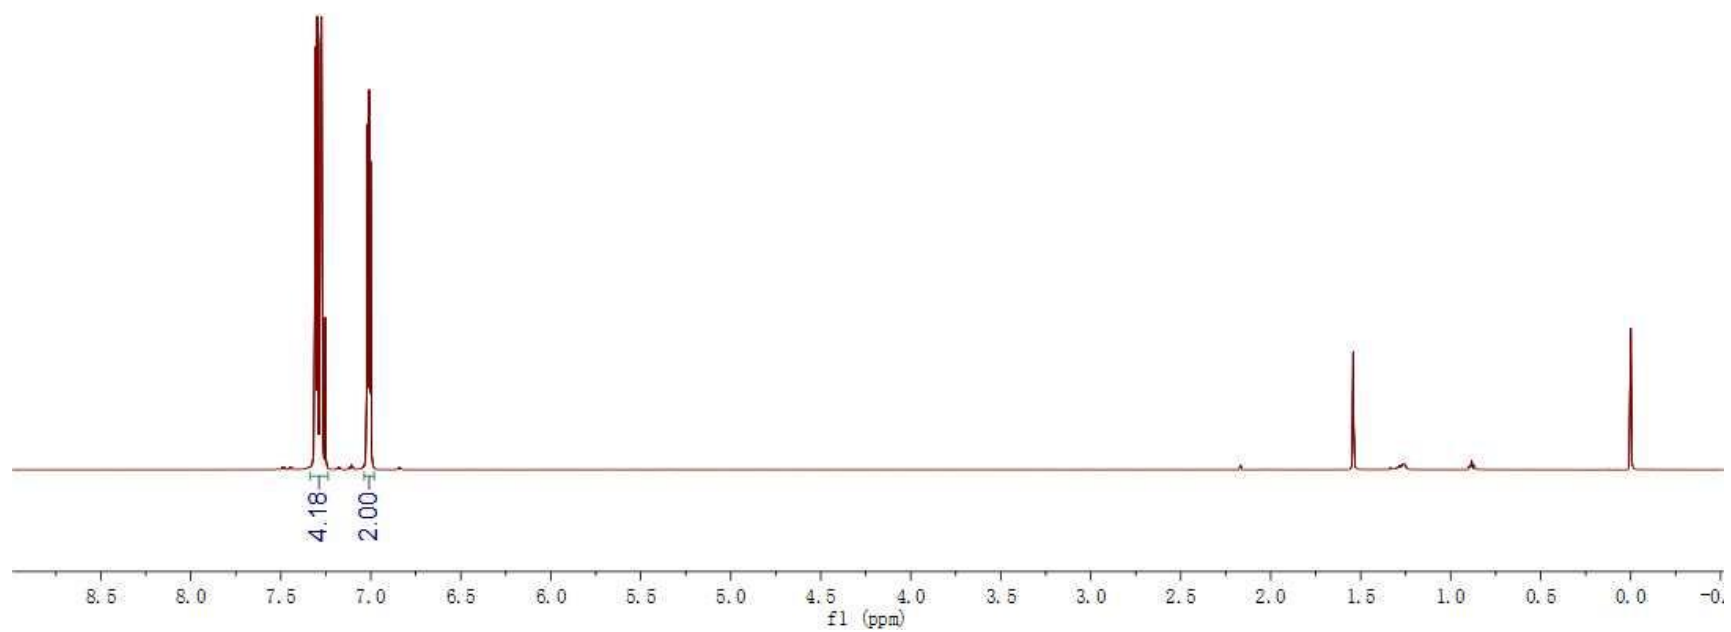

7.66  
7.65  
7.39  
7.26  
6.49  
6.49

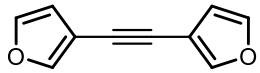

1o: <sup>1</sup>H NMR (500 MHz, CDCl<sub>3</sub>)

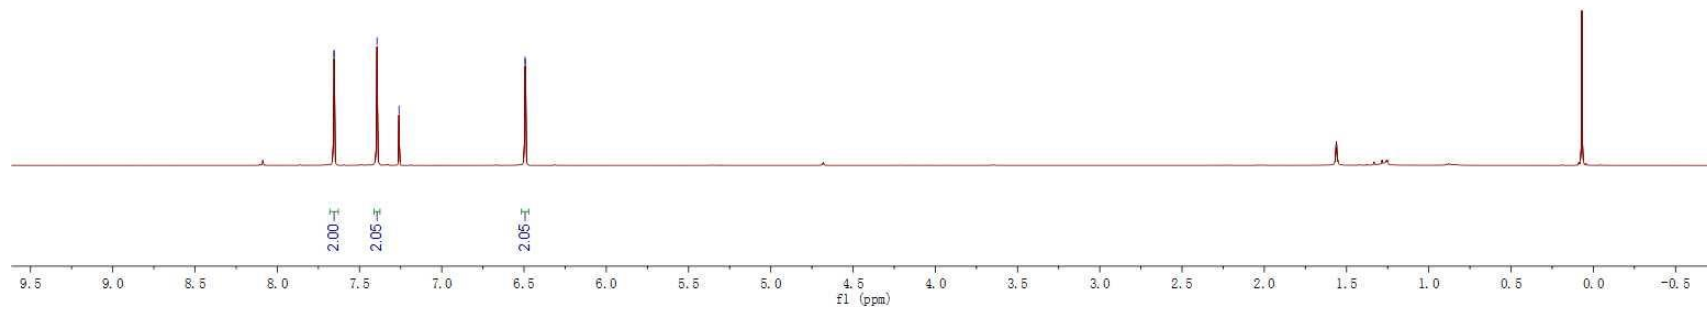

### 3. NMR spectra of the products (3)

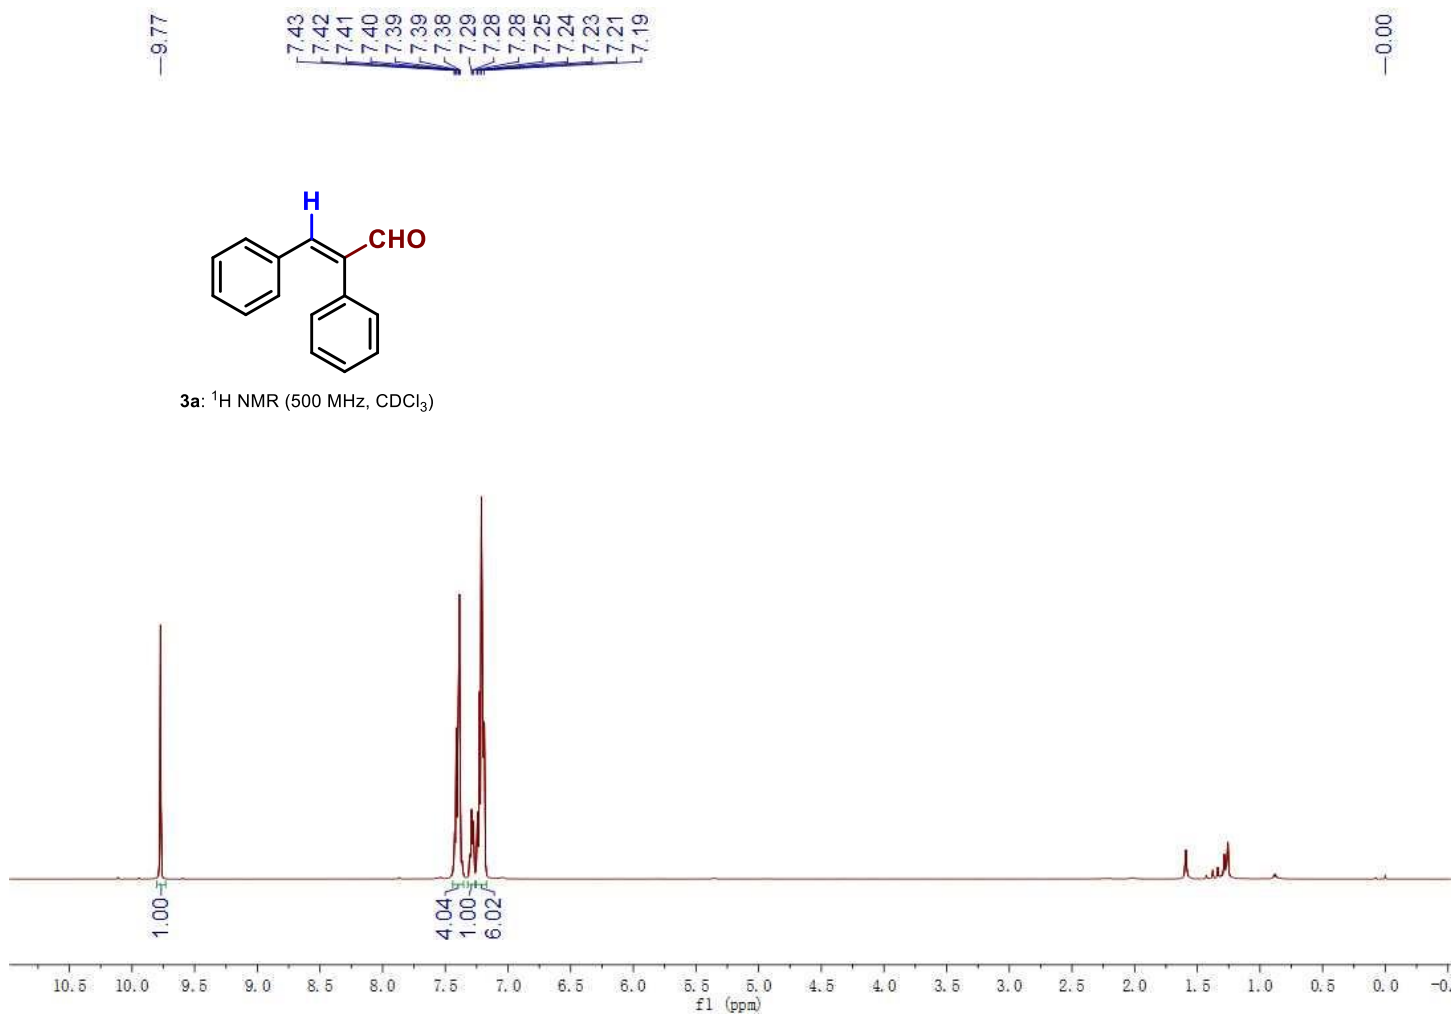

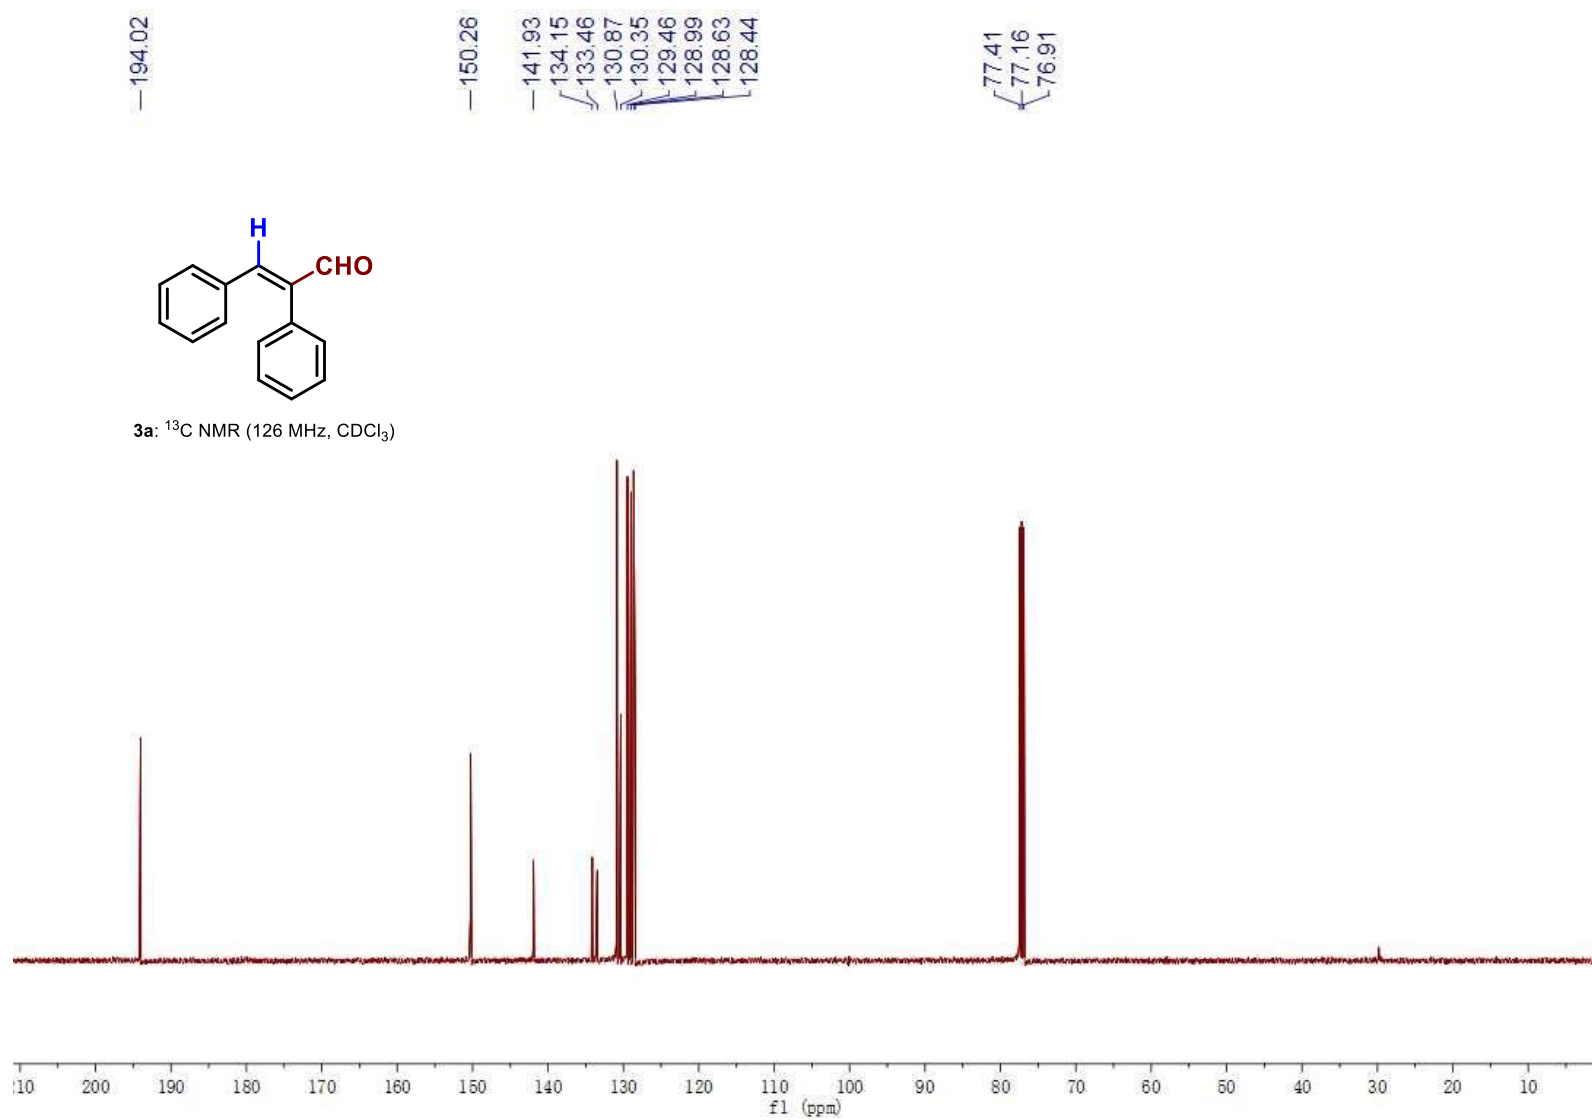

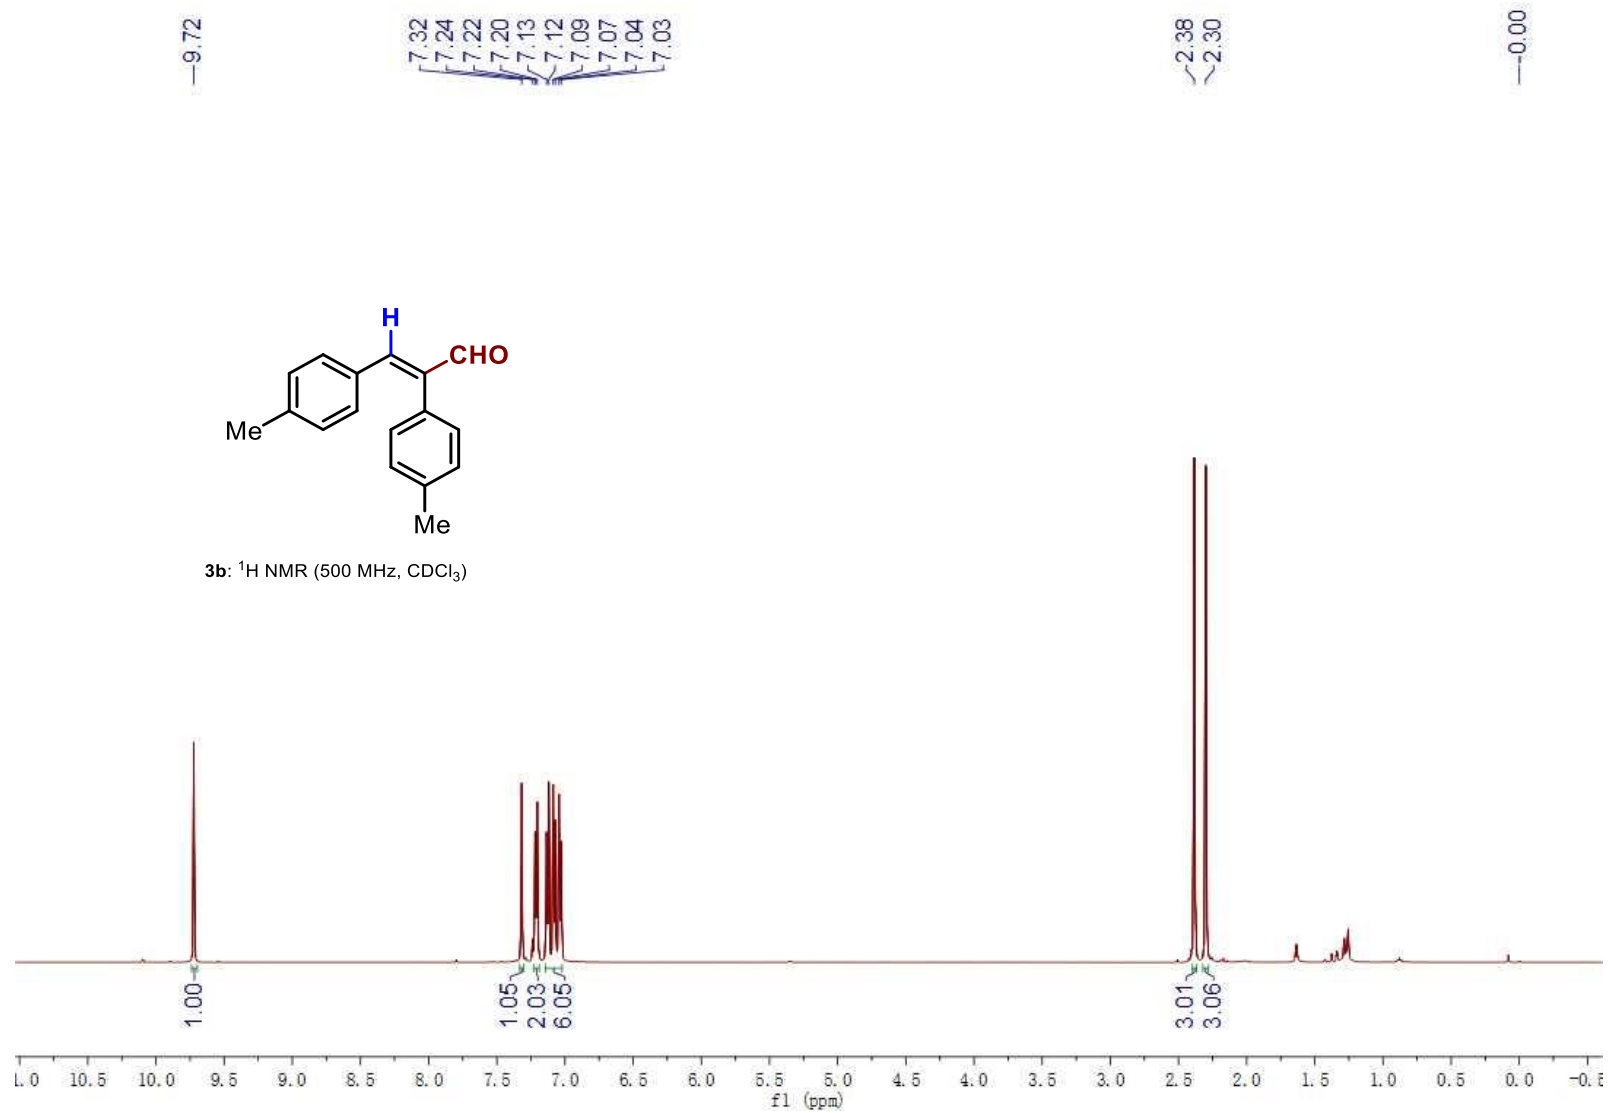

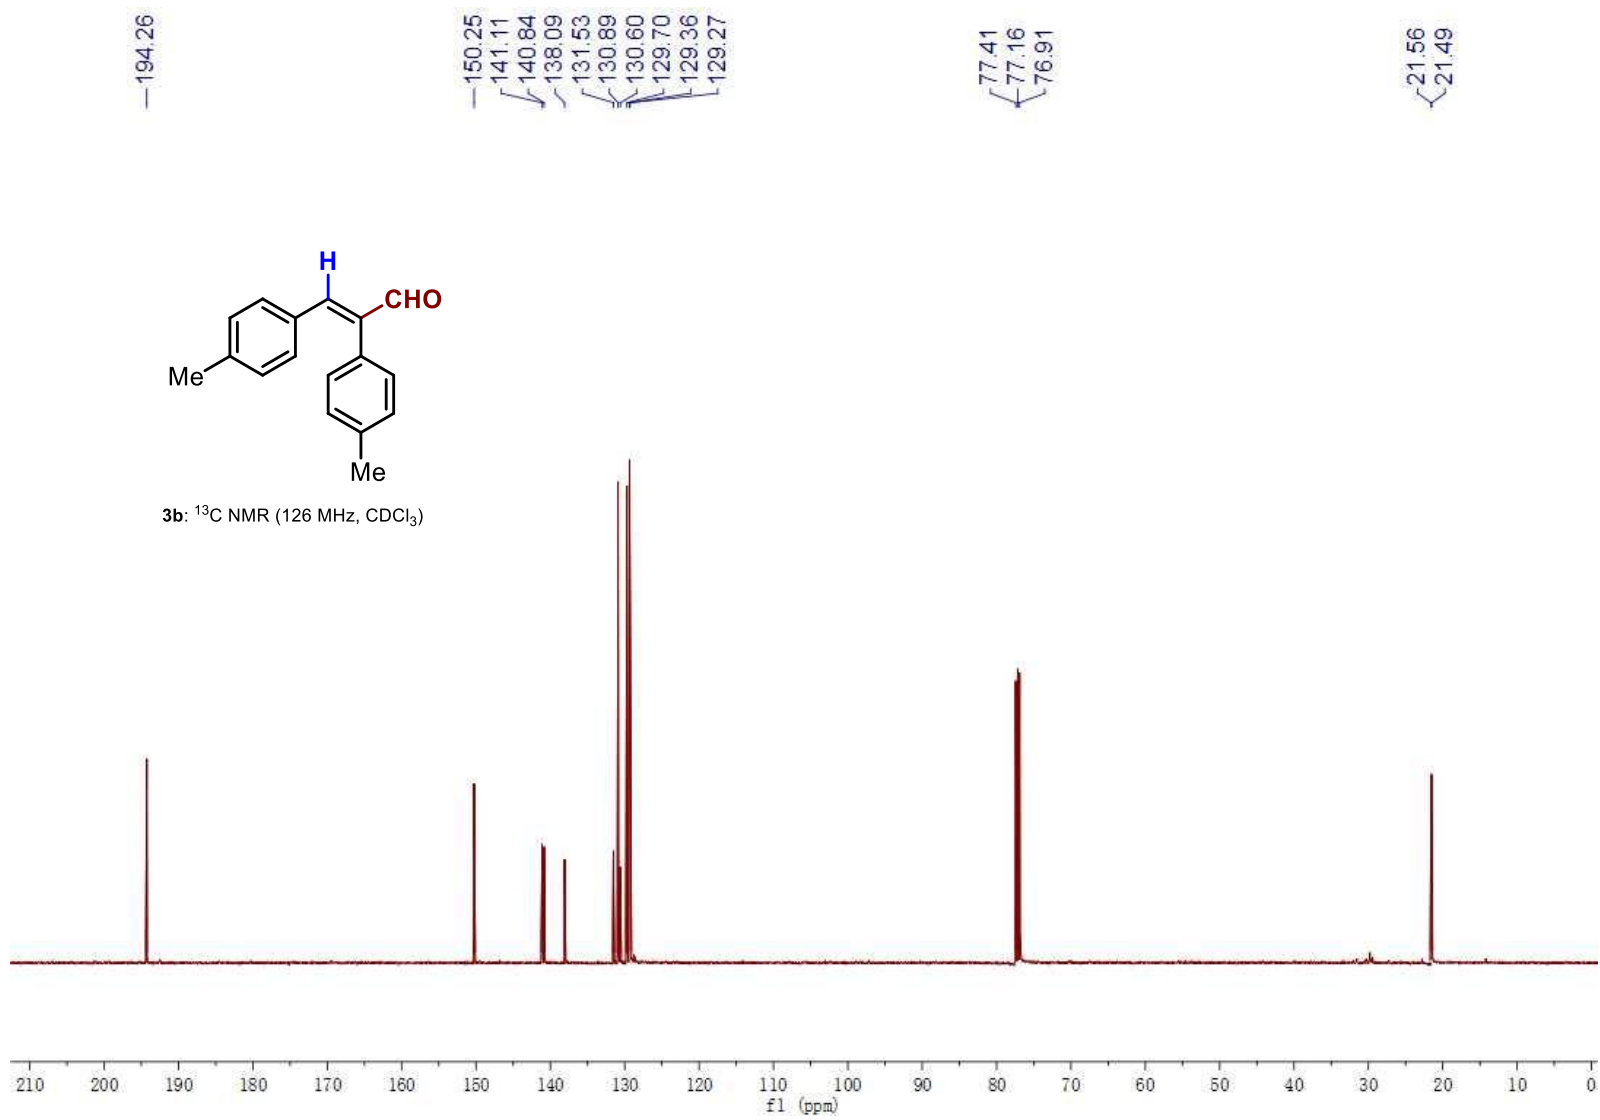

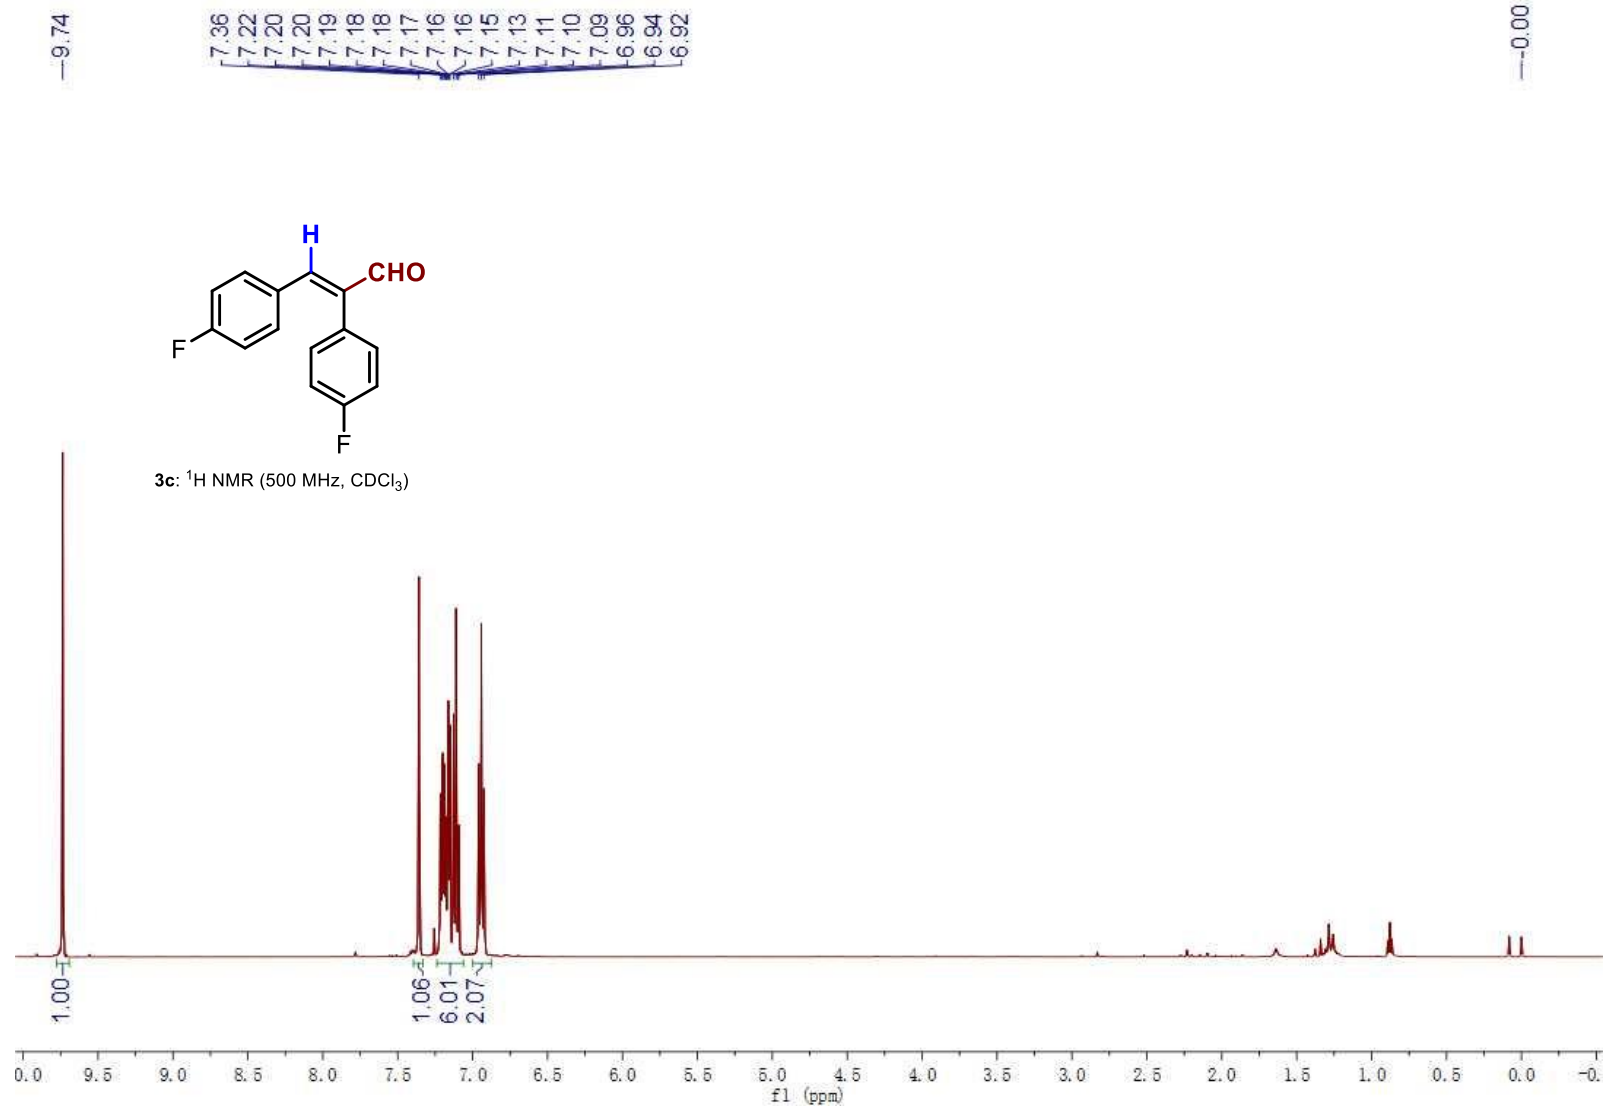



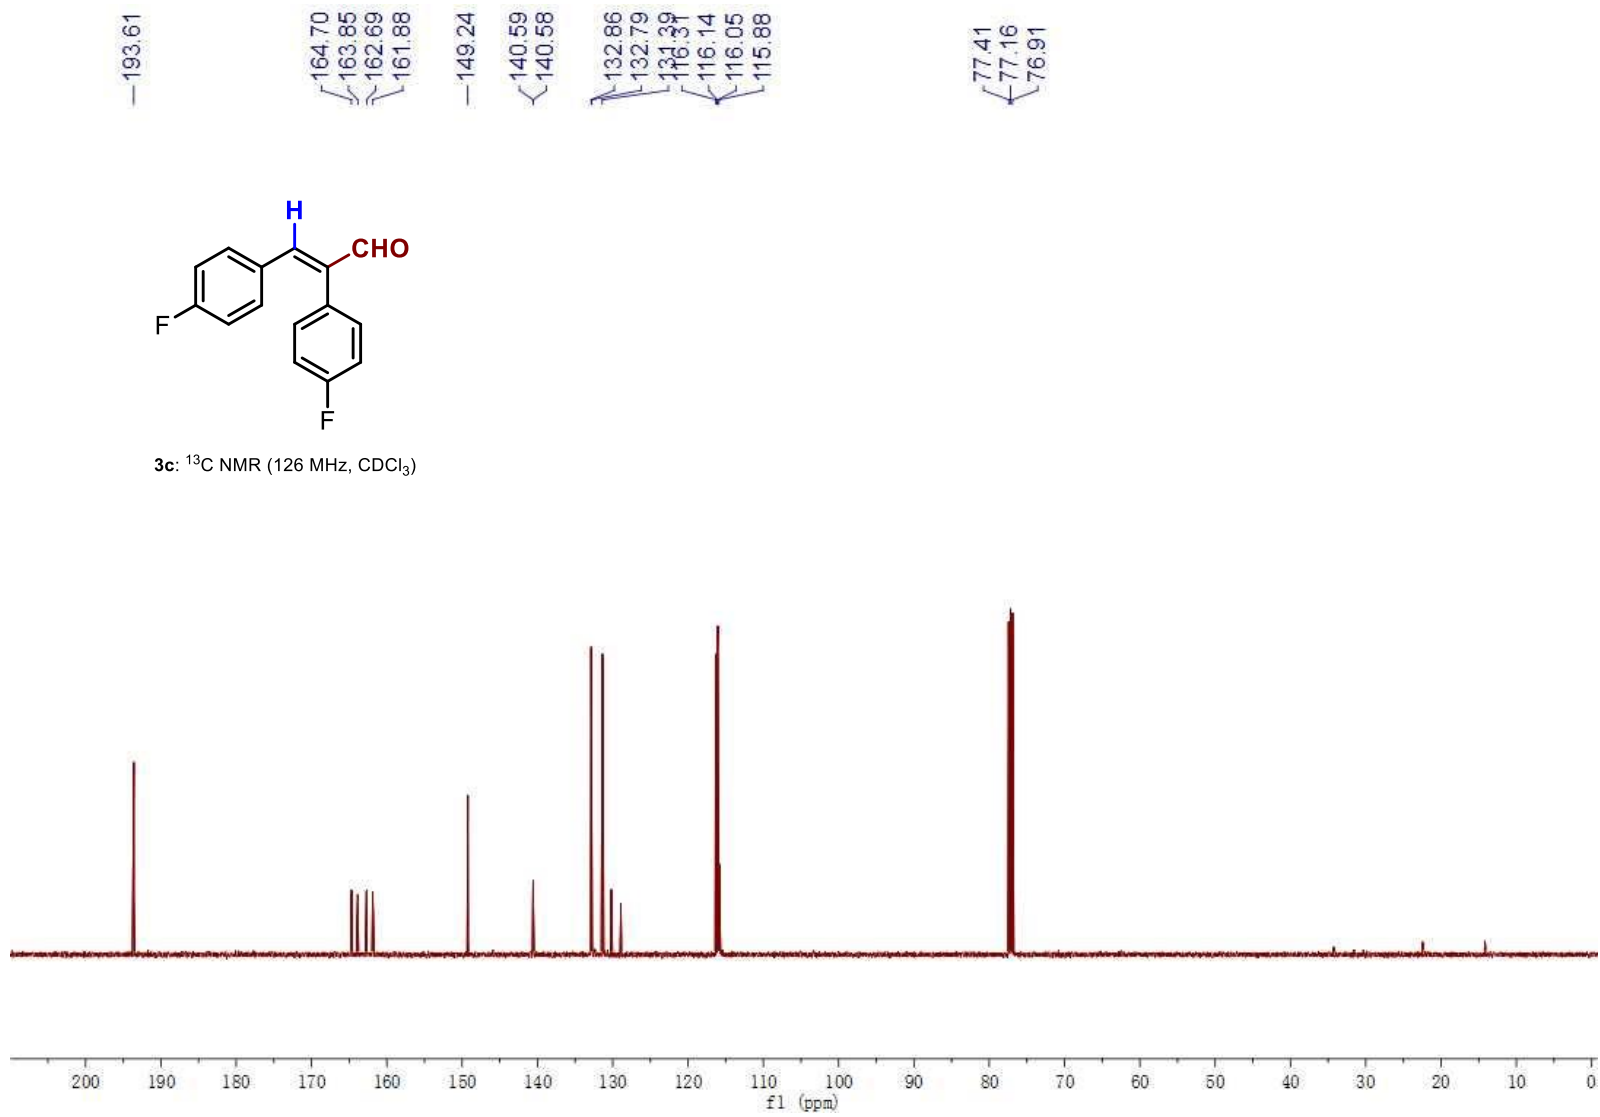

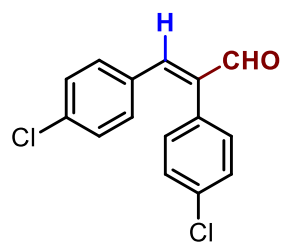

3d:  $^1\text{H}$  NMR (500 MHz,  $\text{CDCl}_3$ )

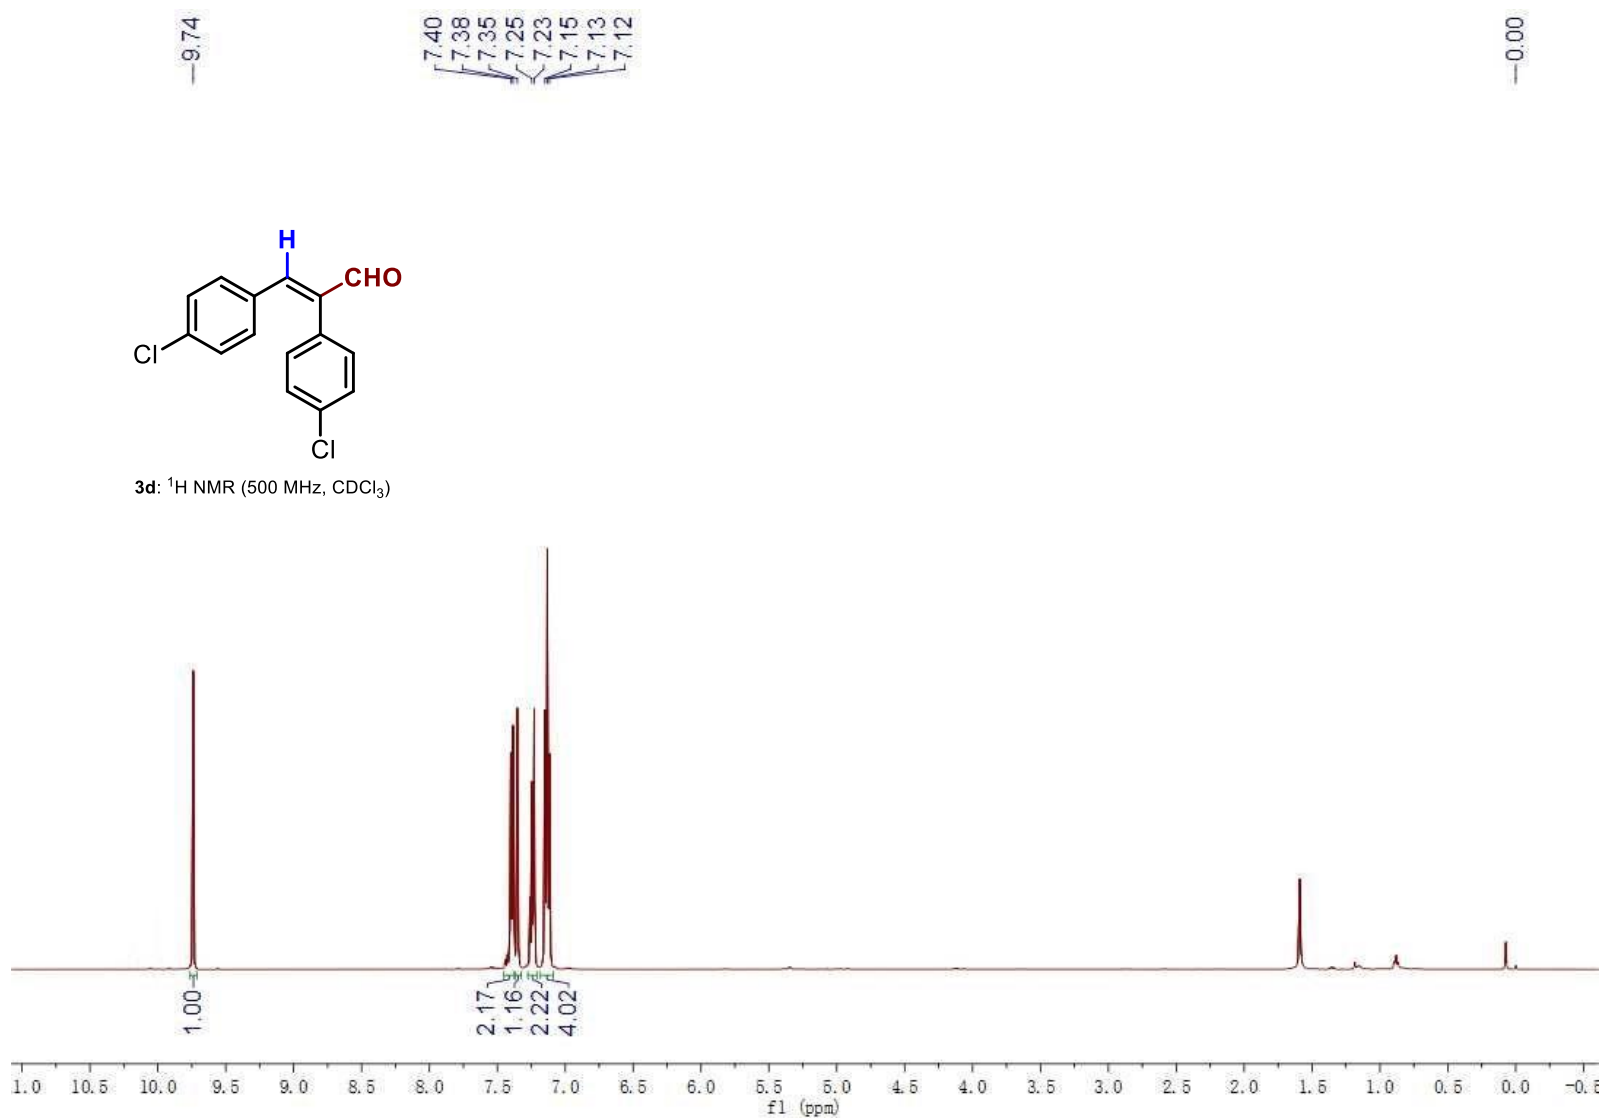

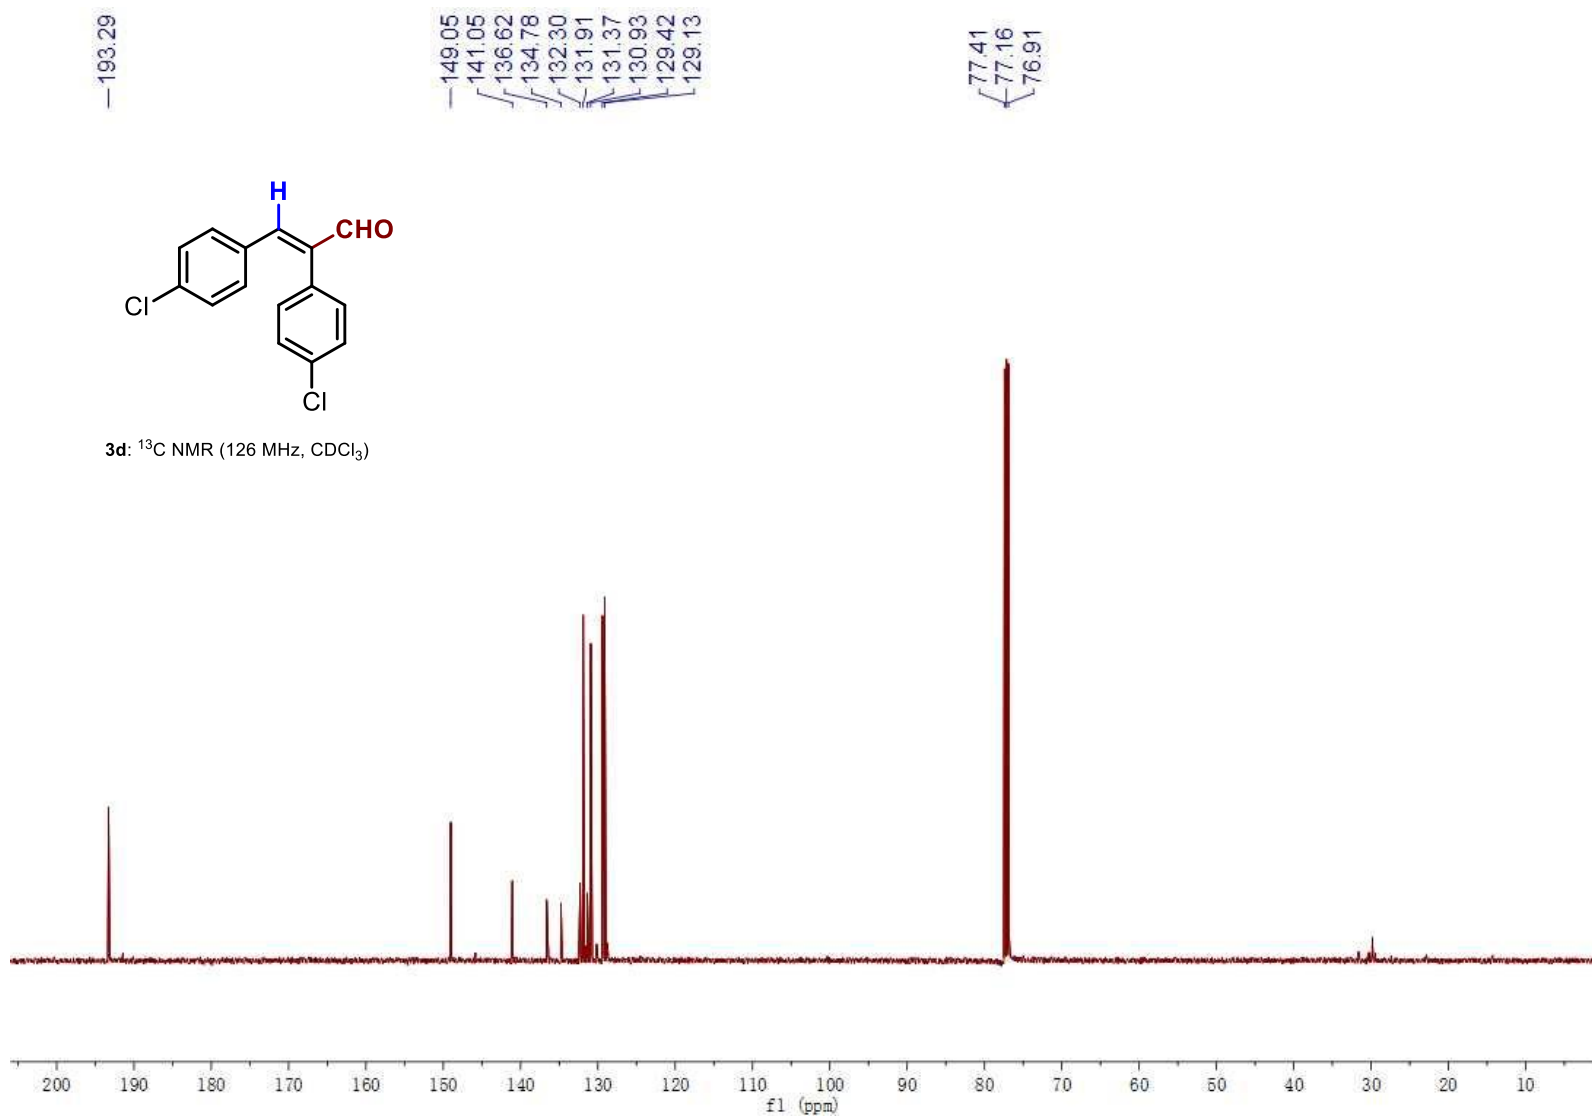

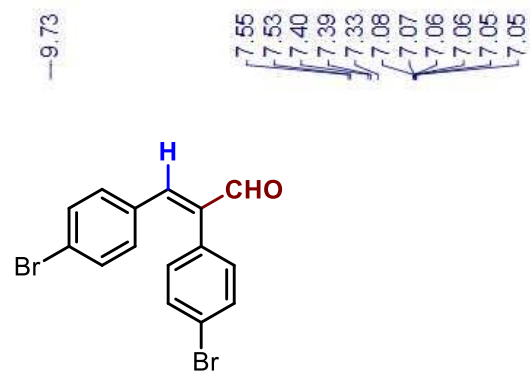

**3e**:  $^1\text{H}$  NMR (500 MHz,  $\text{CDCl}_3$ )

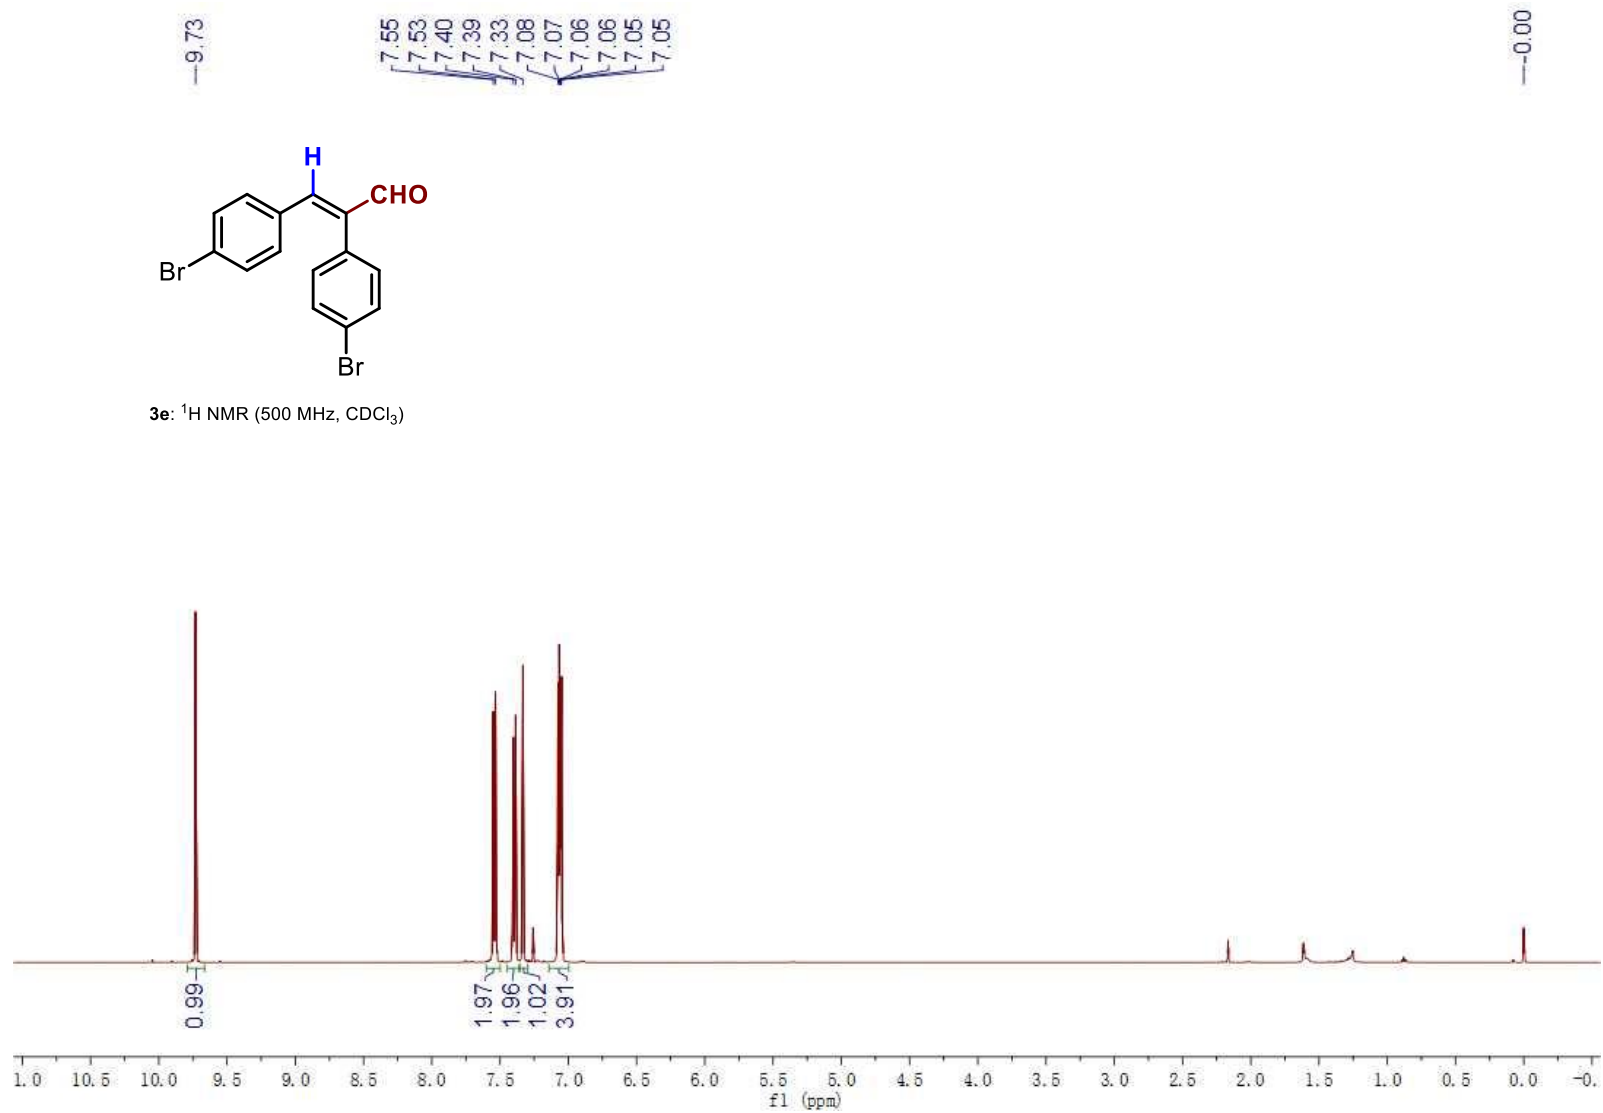

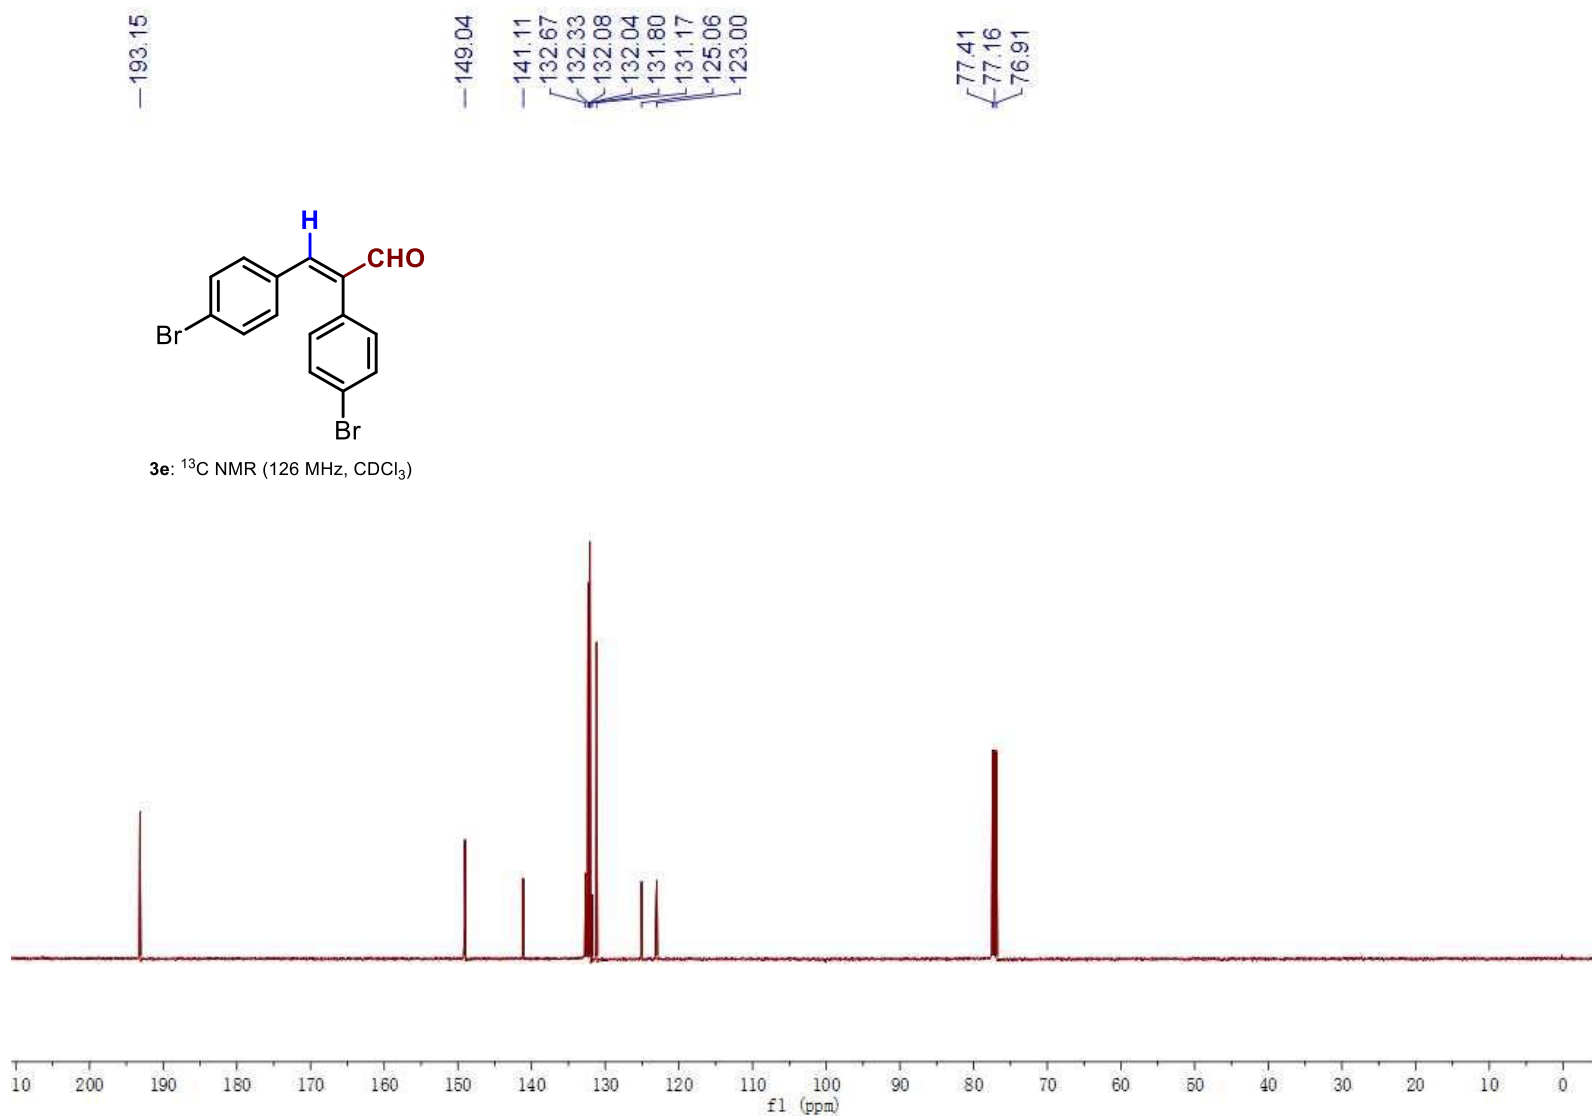

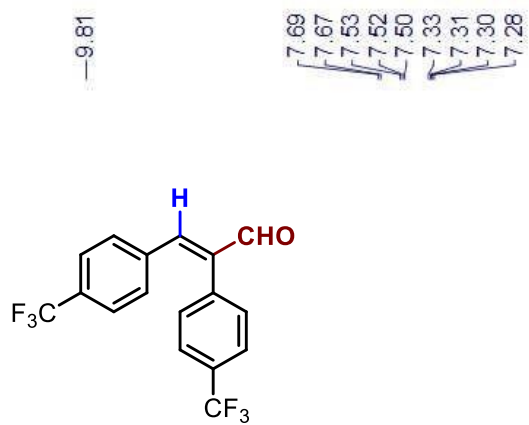

**3f**:  $^1H$  NMR (500 MHz,  $CDCl_3$ )

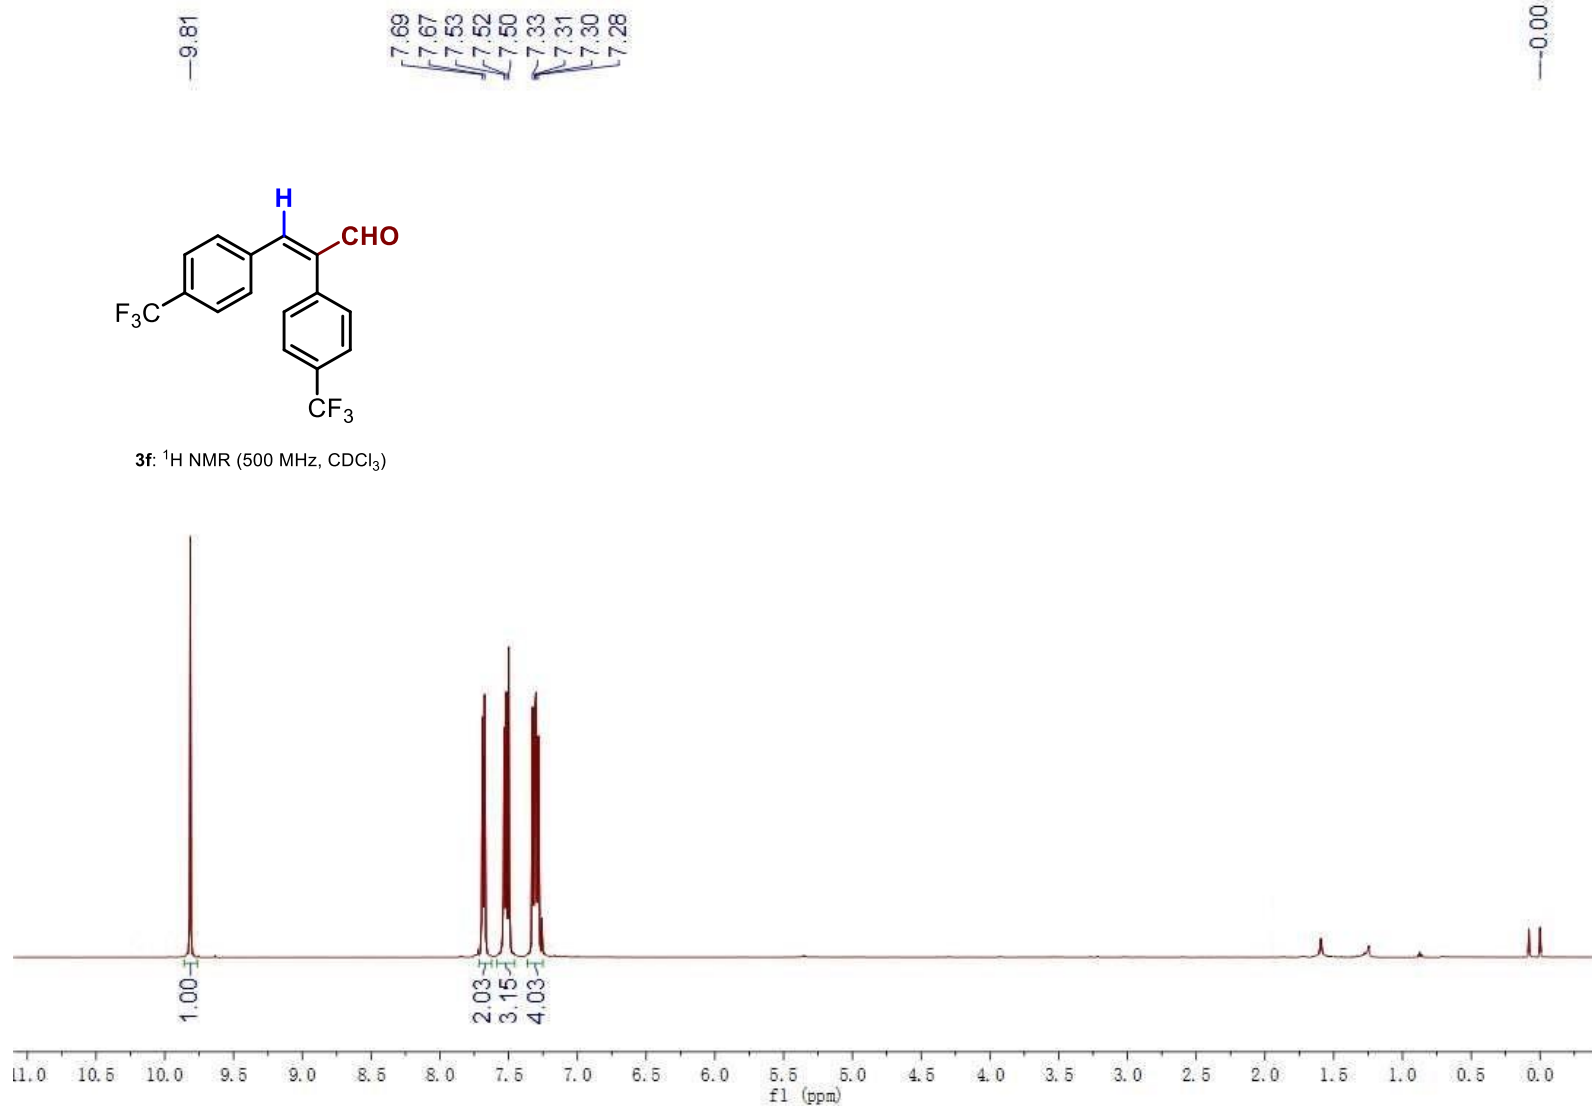

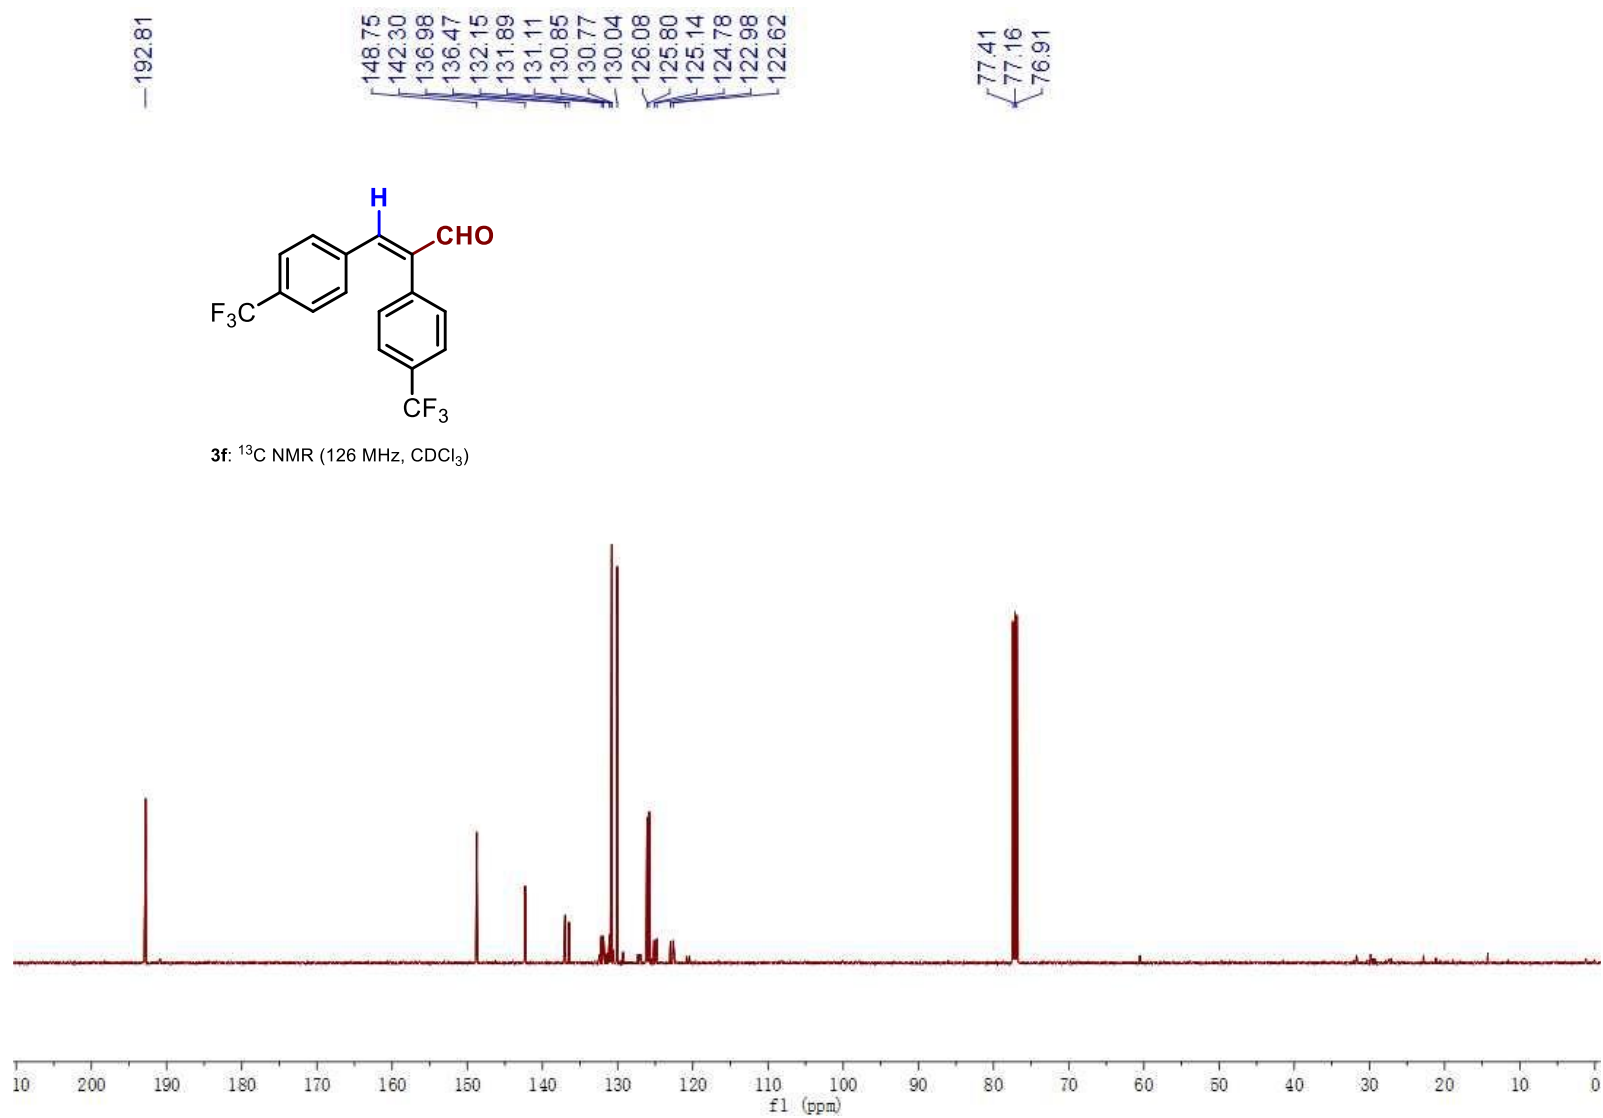

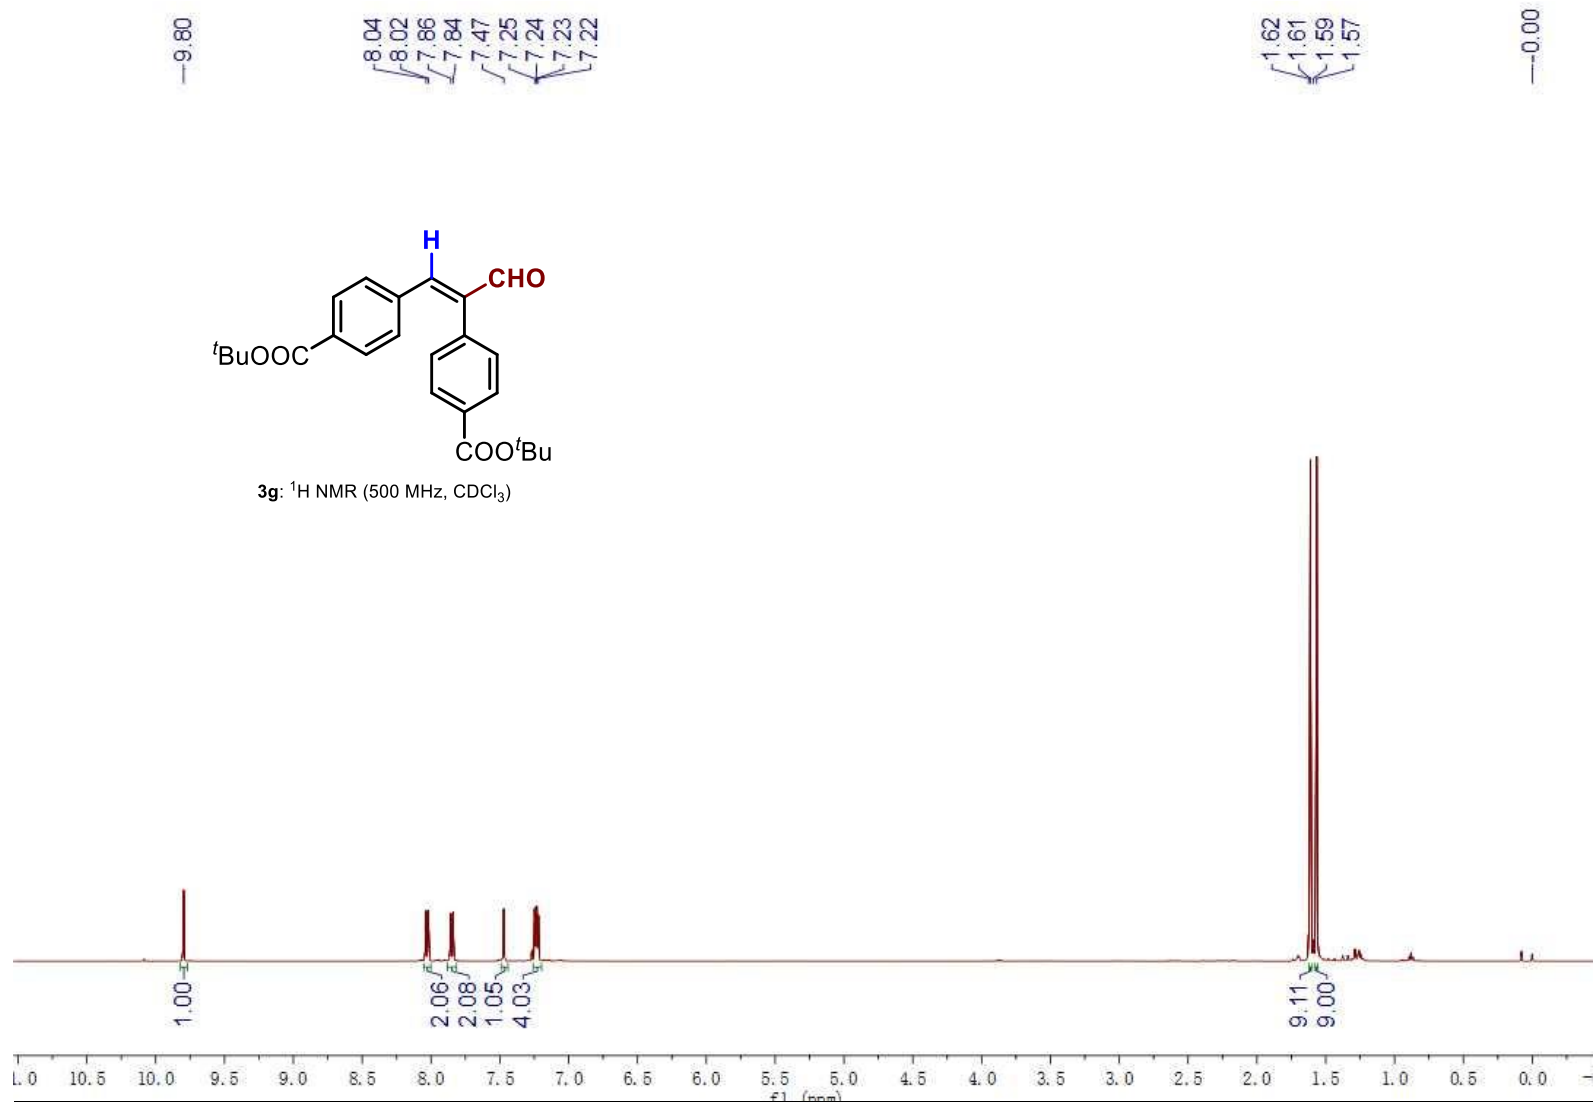



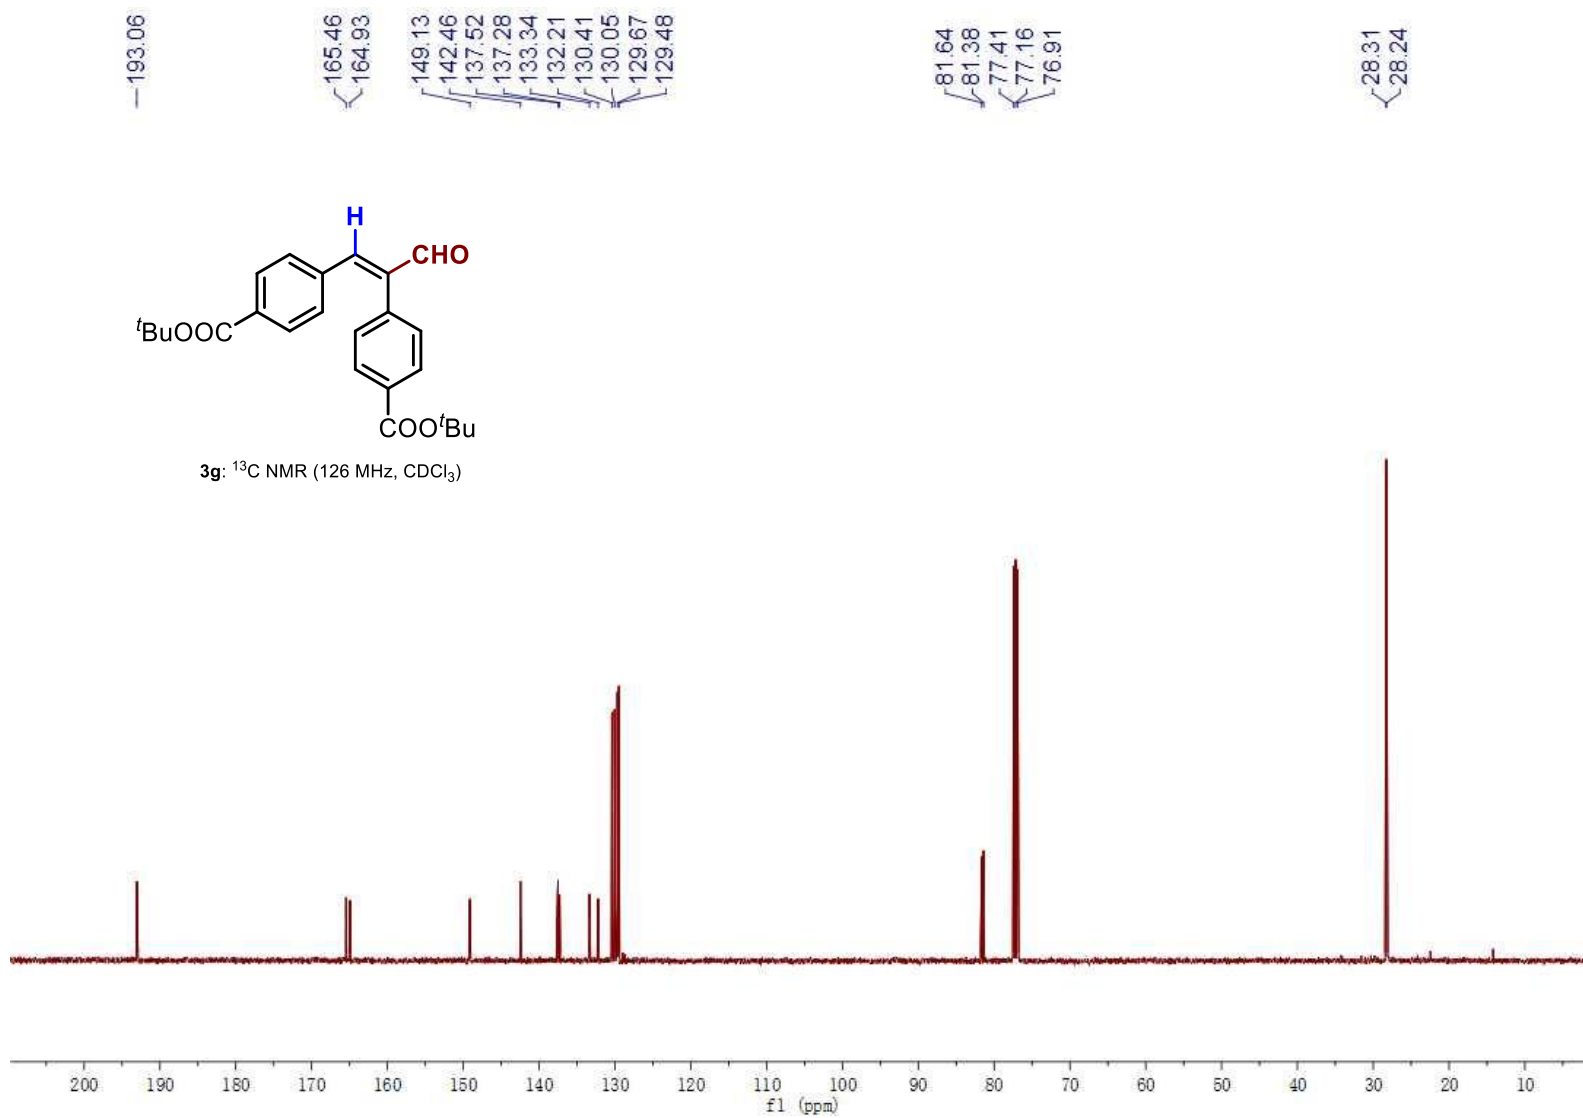

9.74  
 7.33  
 7.30  
 7.29  
 7.27  
 7.24  
 7.20  
 7.18  
 7.10  
 7.09  
 7.07  
 7.05  
 7.01  
 6.98  
 6.96  
 2.35  
 2.23  
 0.00

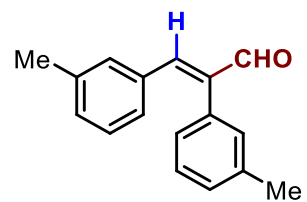

3h: <sup>1</sup>H NMR (500 MHz, CDCl<sub>3</sub>)

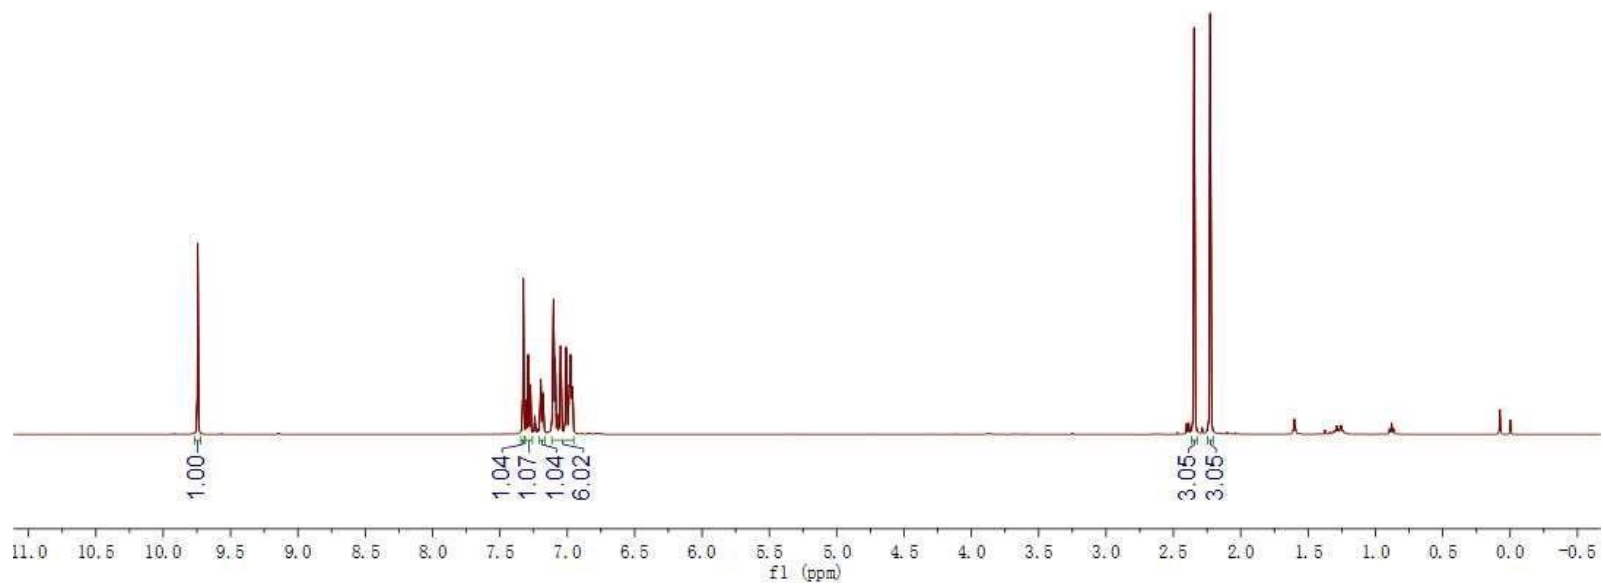

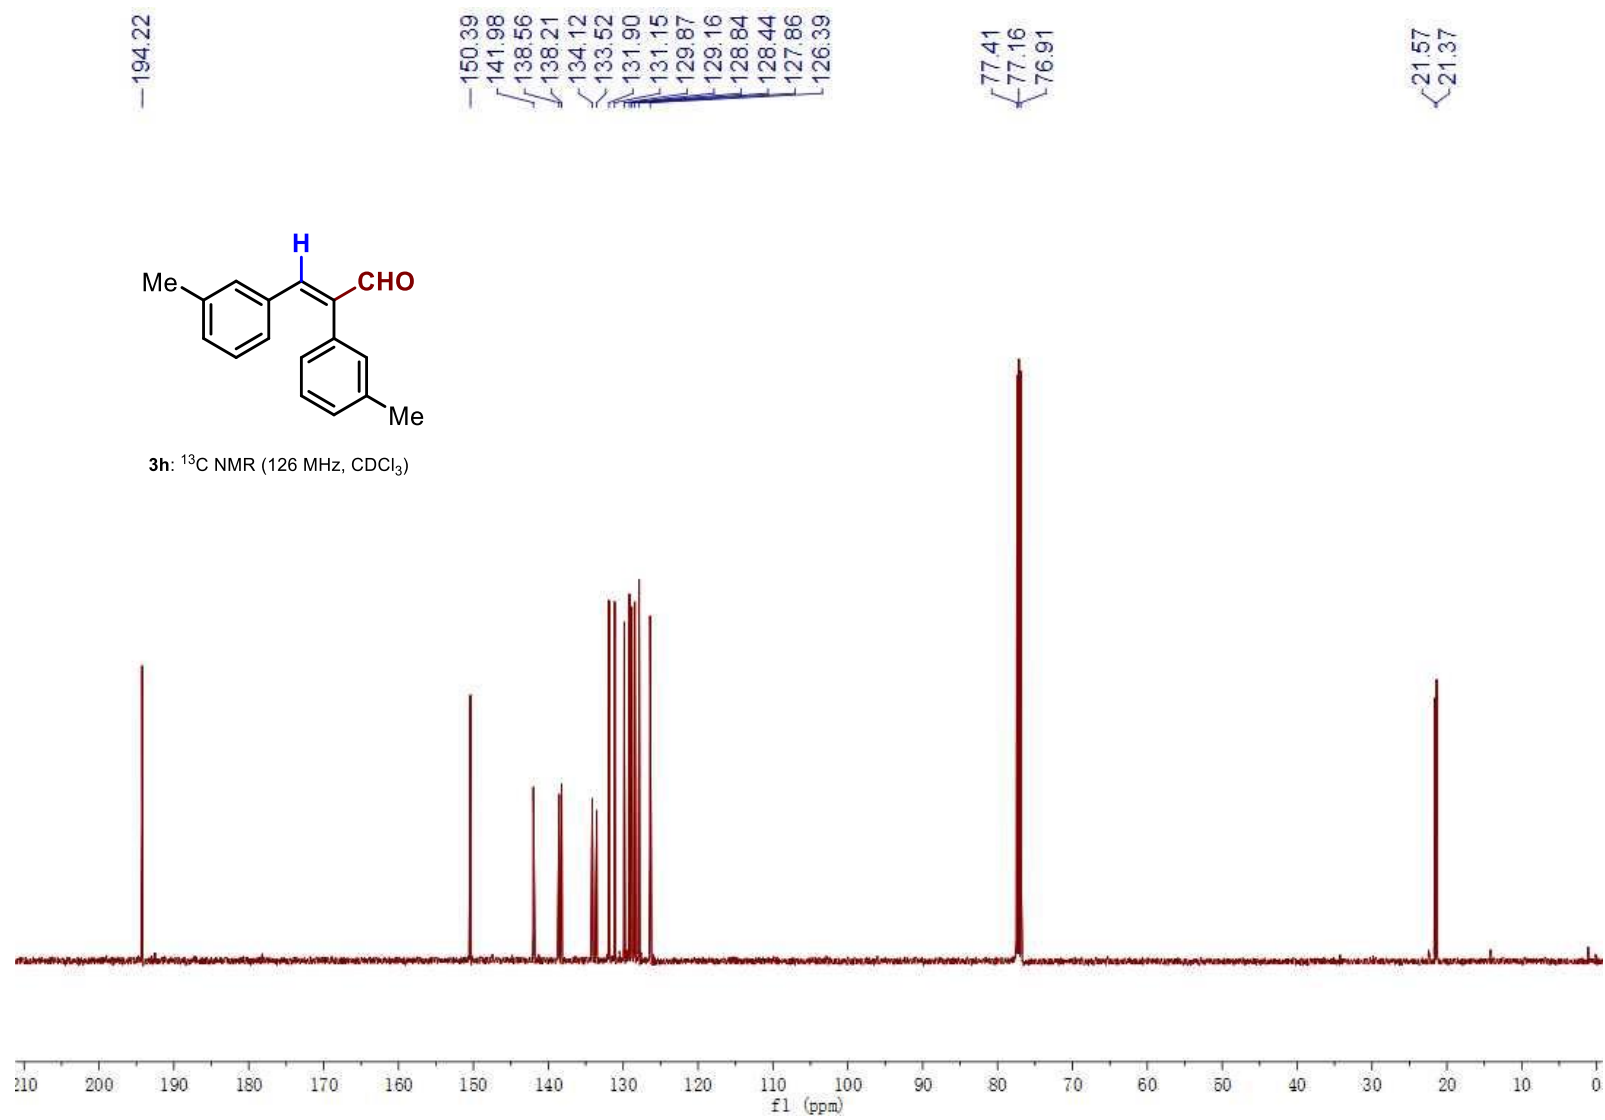

— 9.73  
7.37  
7.36  
7.34  
7.32  
7.29  
7.29  
7.27  
7.20  
7.19  
7.18  
7.17  
7.15  
7.06  
7.05  
7.03  
— 0.00

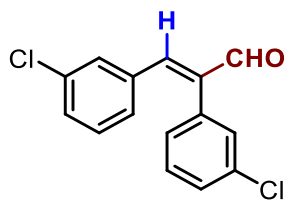

3: <sup>1</sup>H NMR (500 MHz, CDCl<sub>3</sub>)

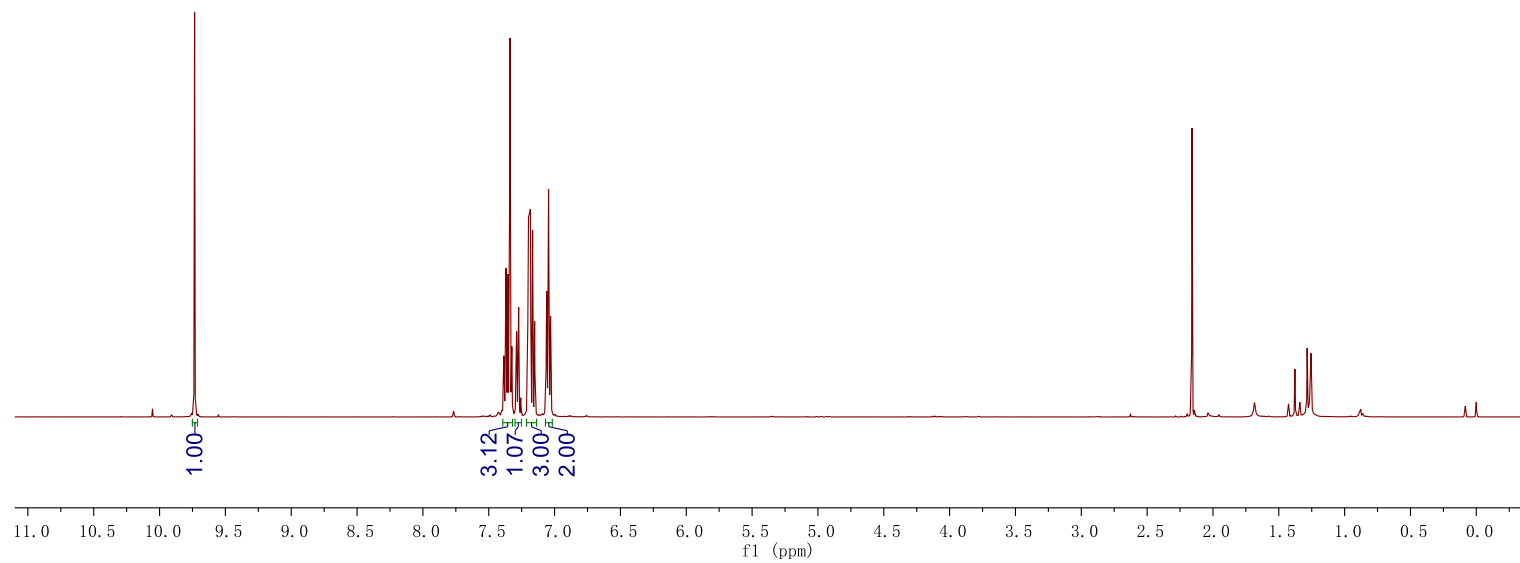

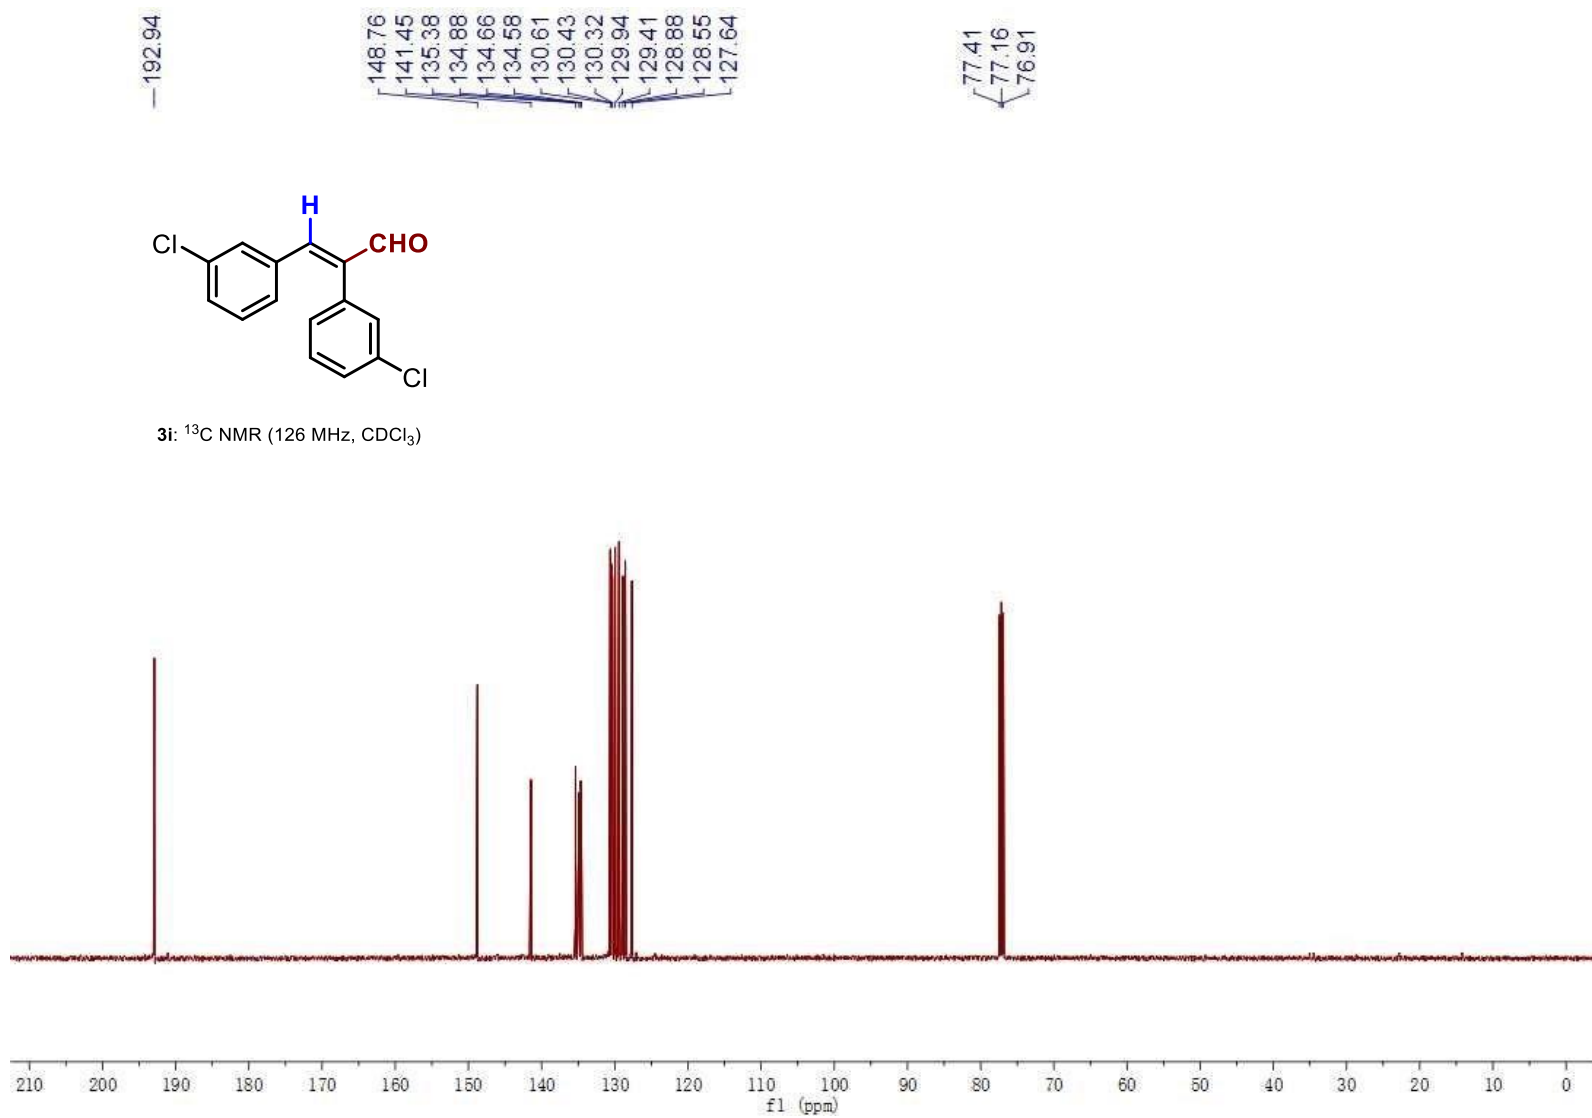

9.81  
7.68  
7.67  
7.57  
7.56  
7.54  
7.49  
7.45  
7.41  
7.40  
7.38  
7.38  
7.36  
7.34  
7.32  
7.26  
0.00

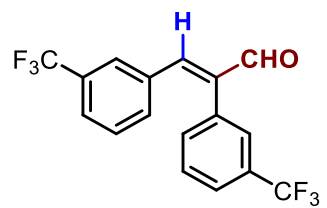

**3j**:  $^1\text{H}$  NMR (500 MHz,  $\text{CDCl}_3$ )

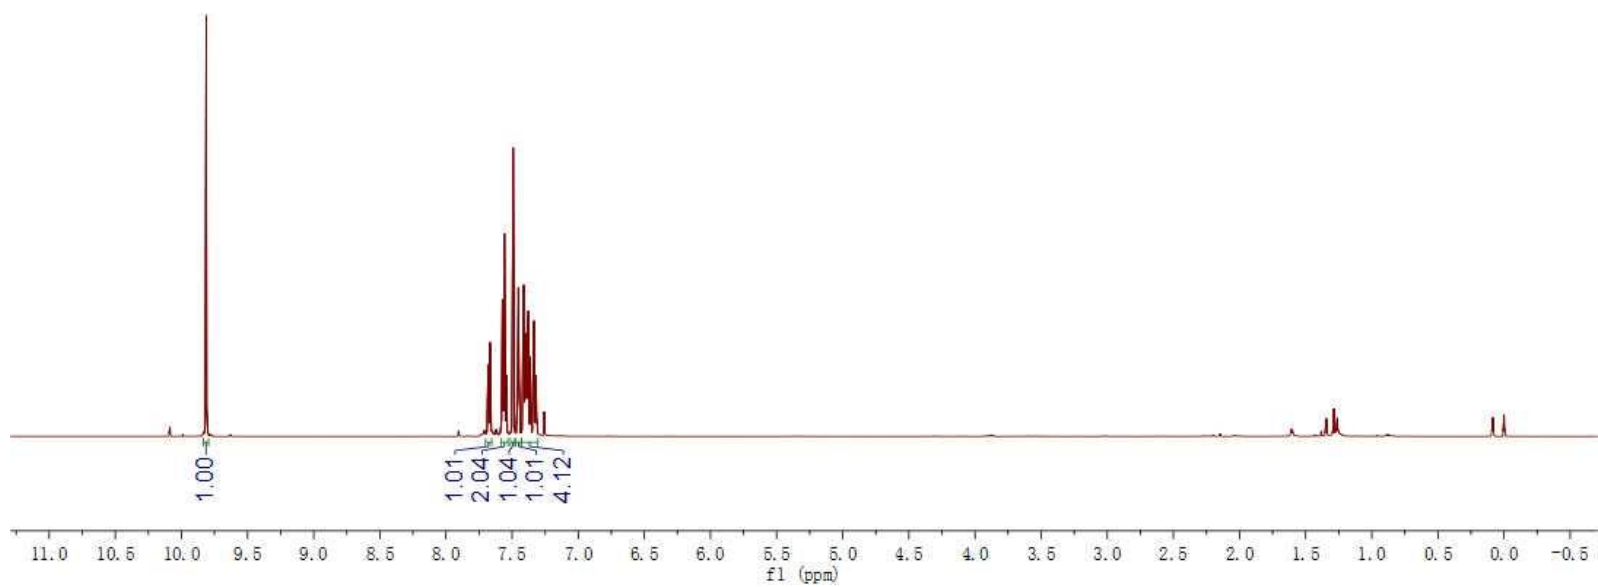

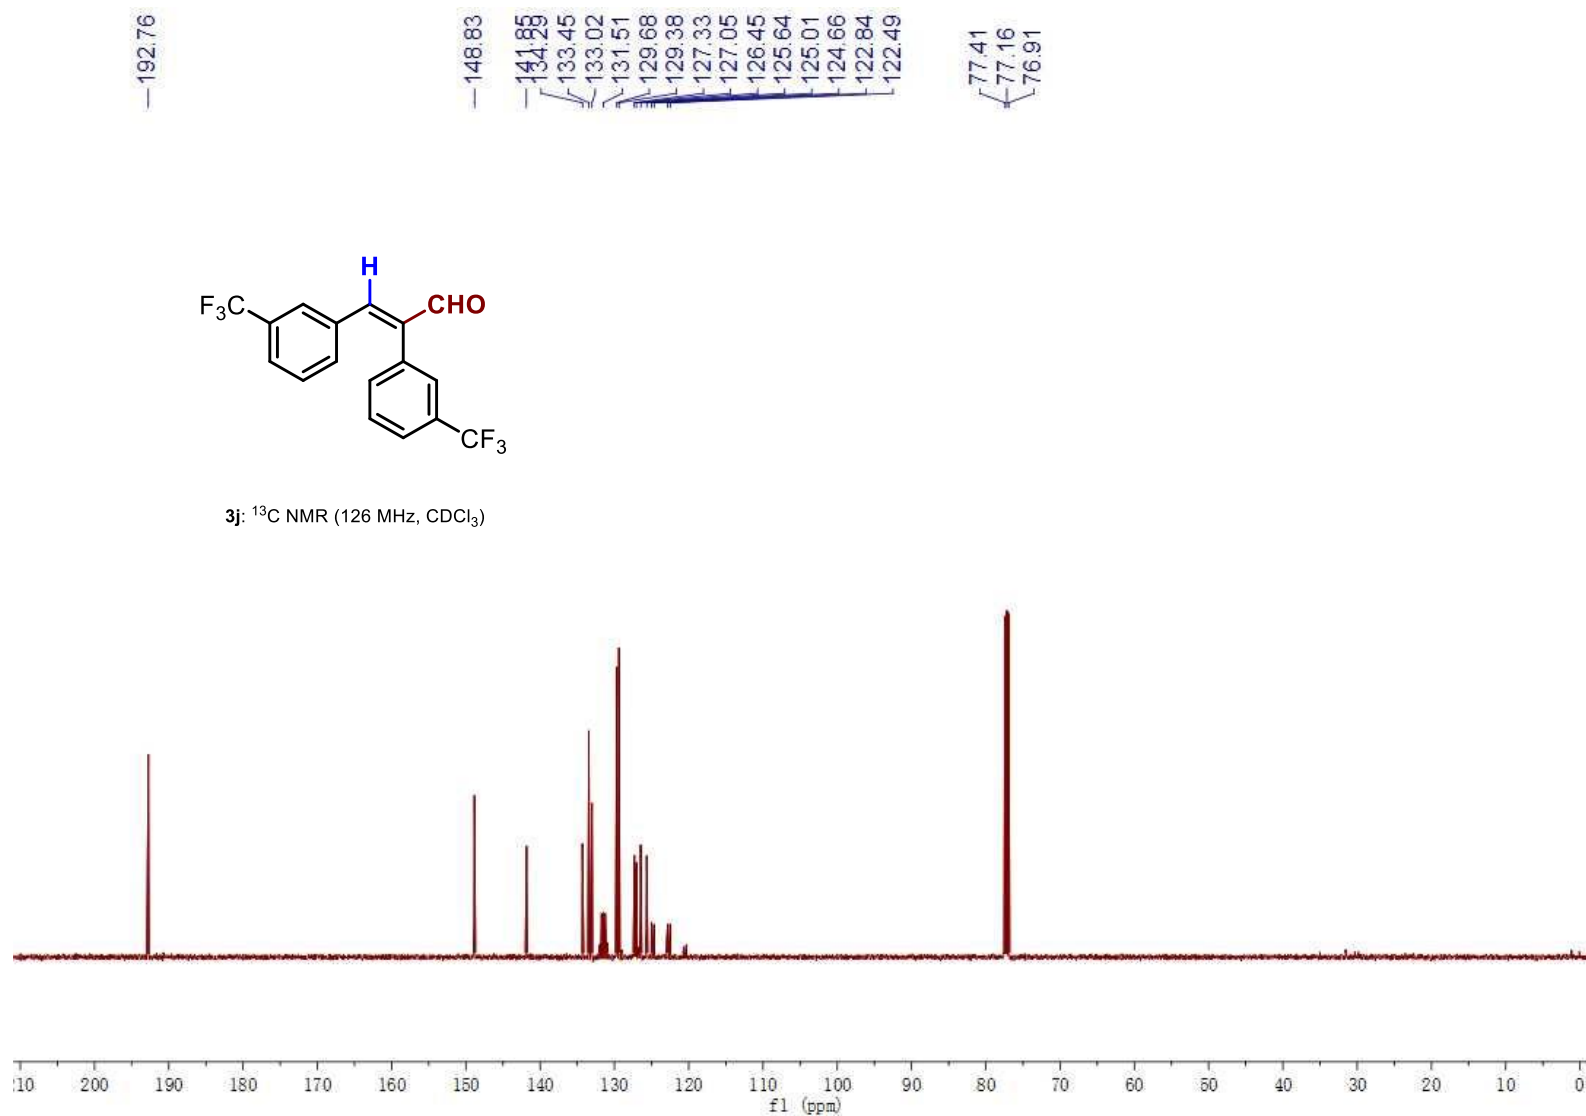

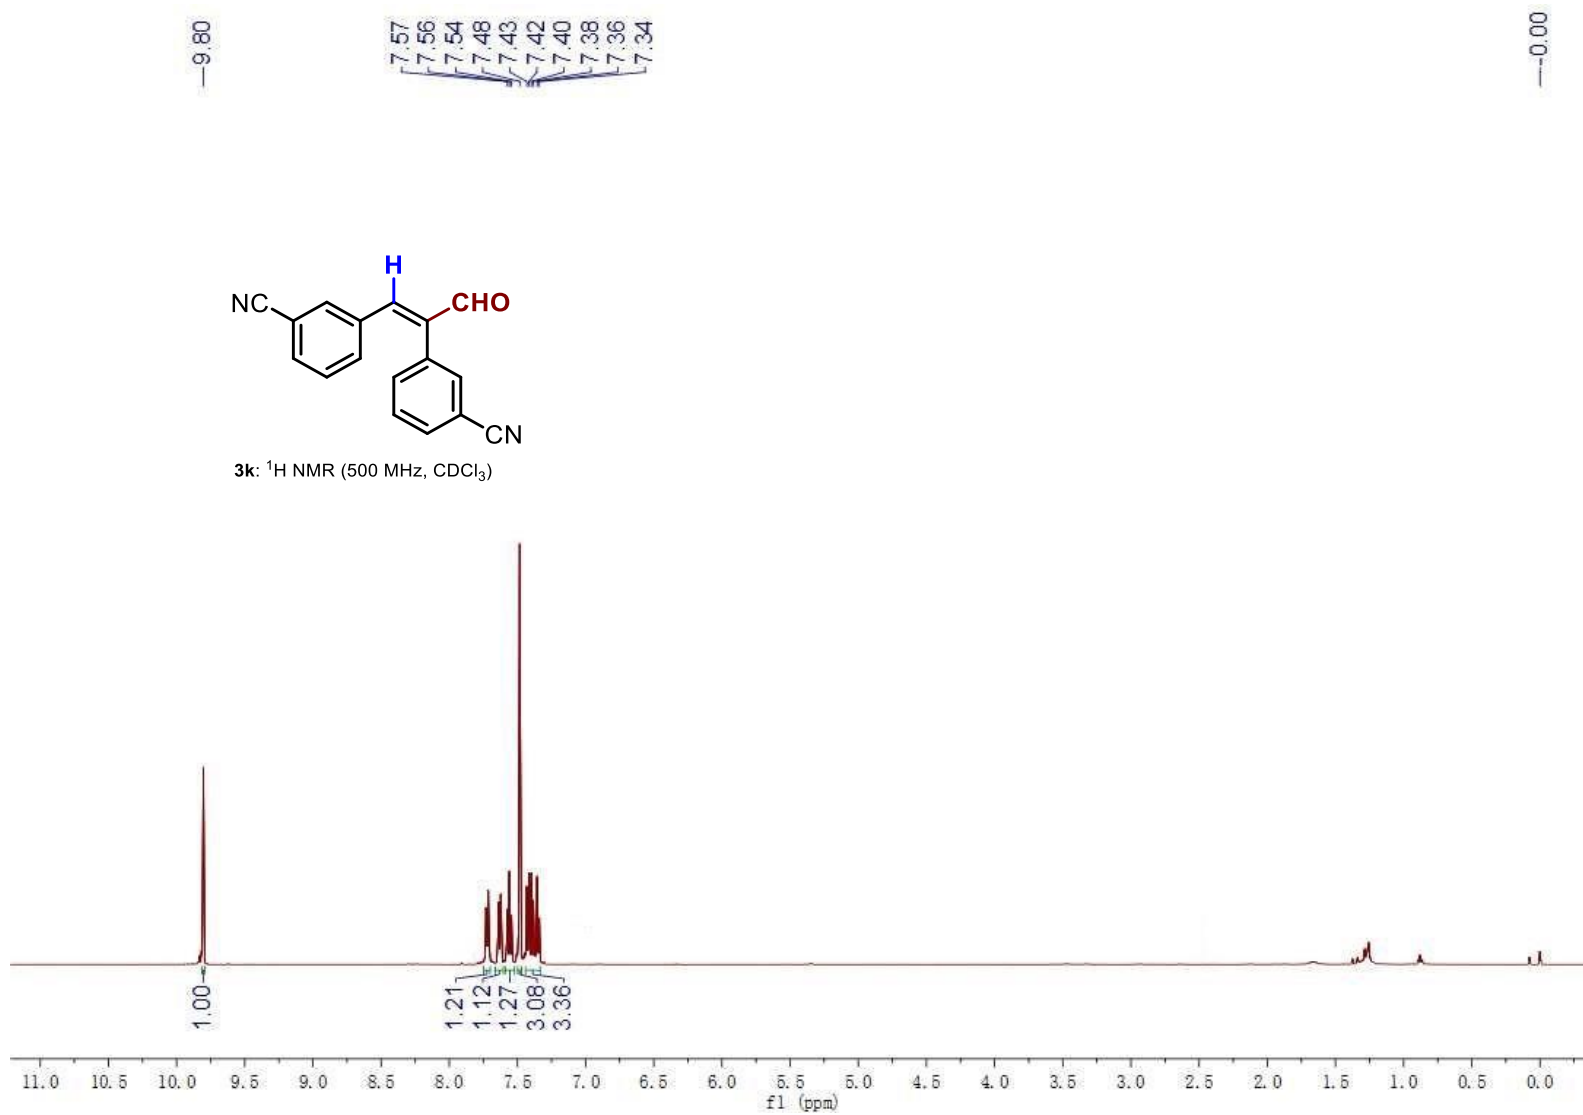



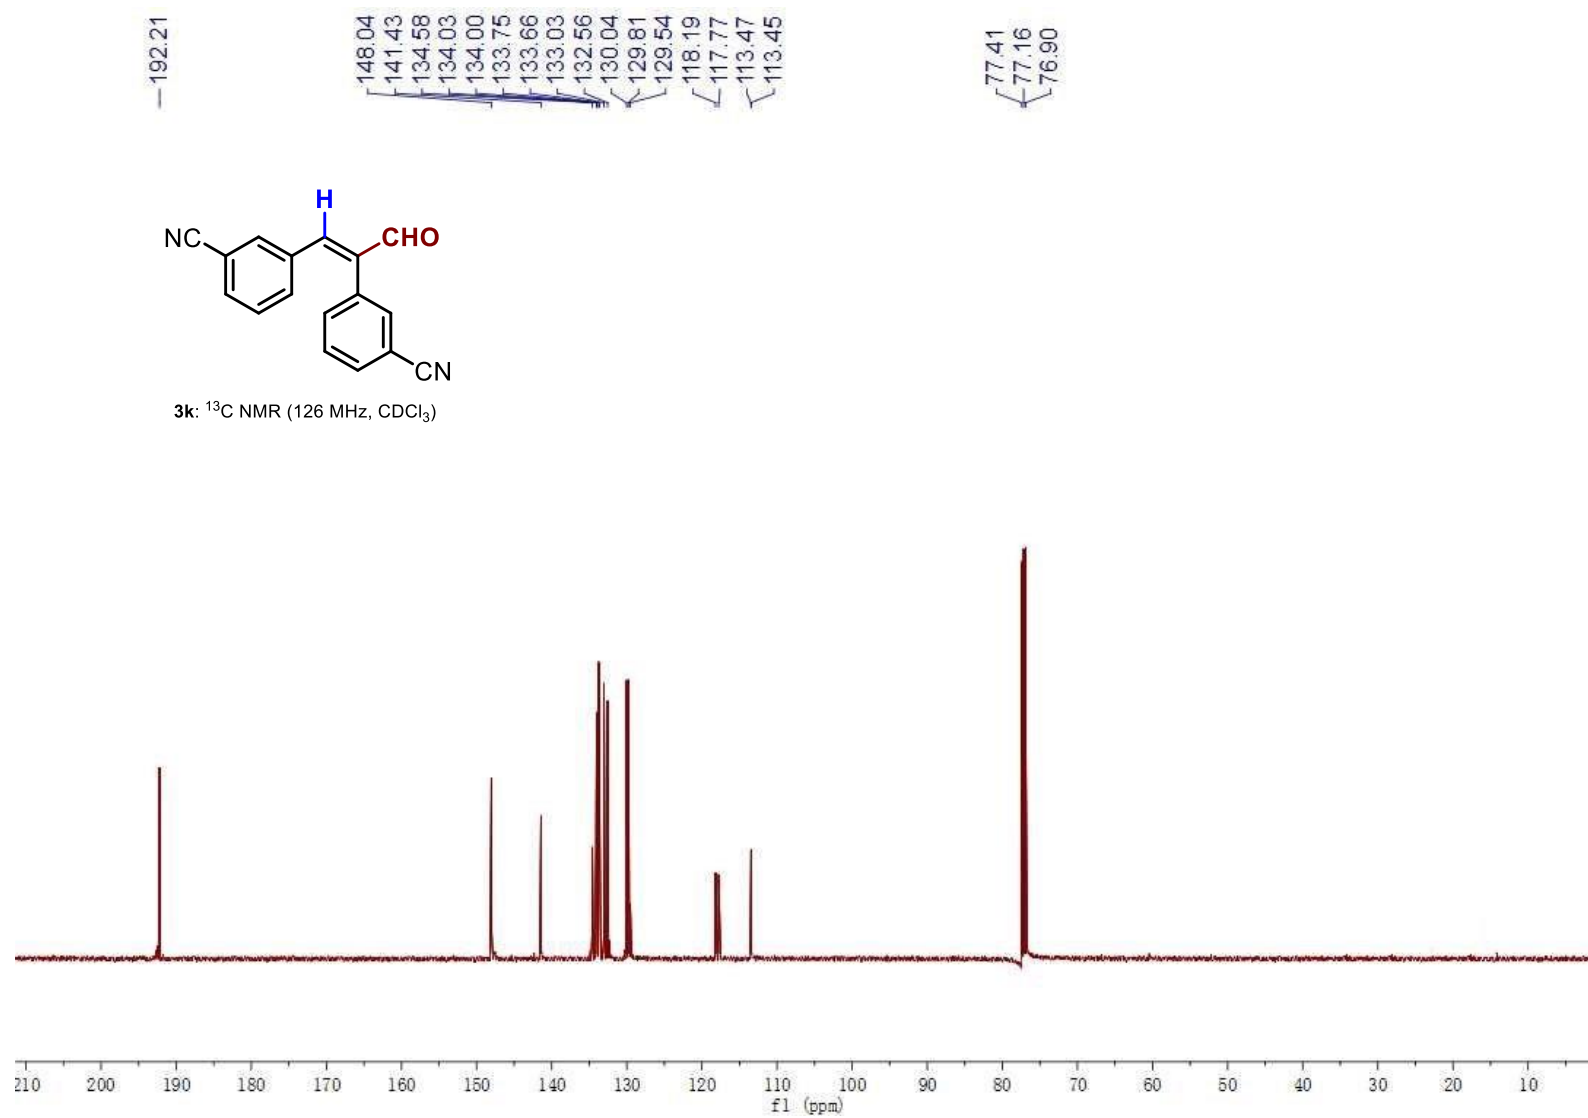

-9.82

-7.72  
-7.27  
-7.25  
-7.24  
-7.23  
-7.21  
-7.20  
-7.18  
-7.16  
-7.15  
-6.99  
-6.88  
-6.87  
-6.85  
-6.79  
-6.77

-2.50

-2.03

-0.00

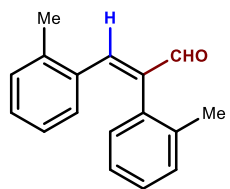

3i: <sup>1</sup>H NMR (500 MHz, CDCl<sub>3</sub>)

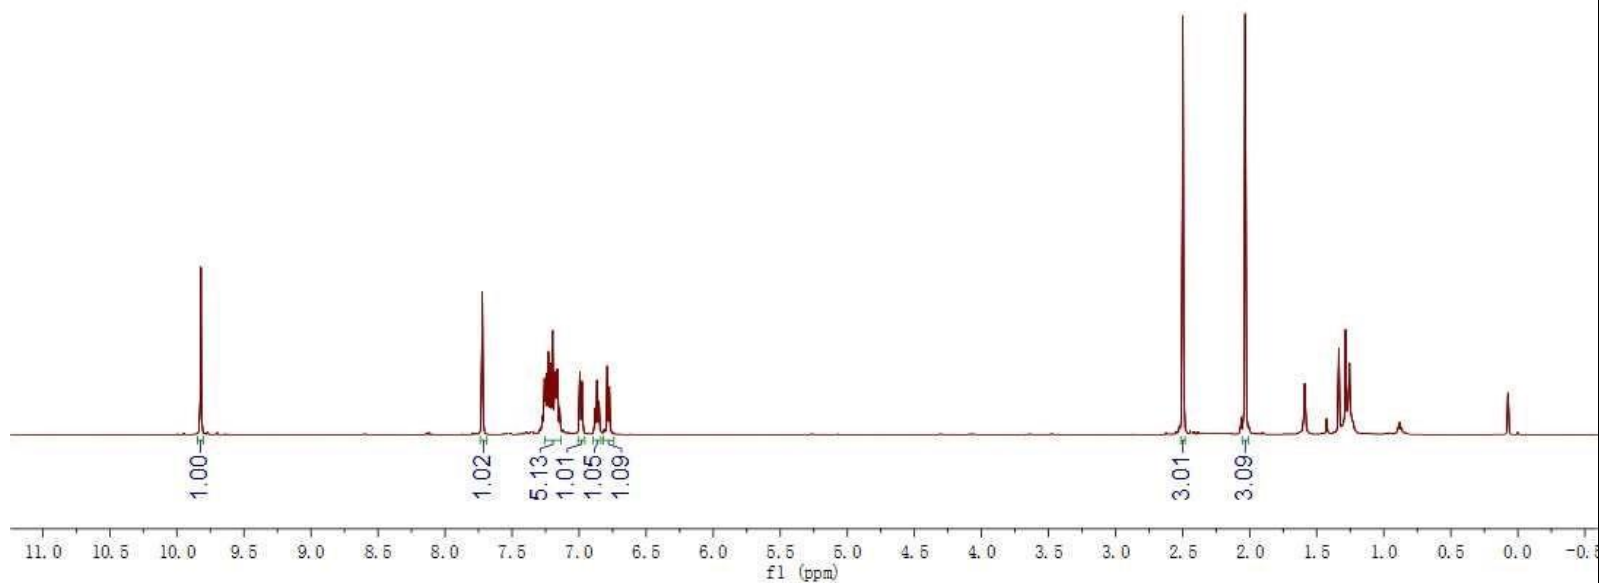

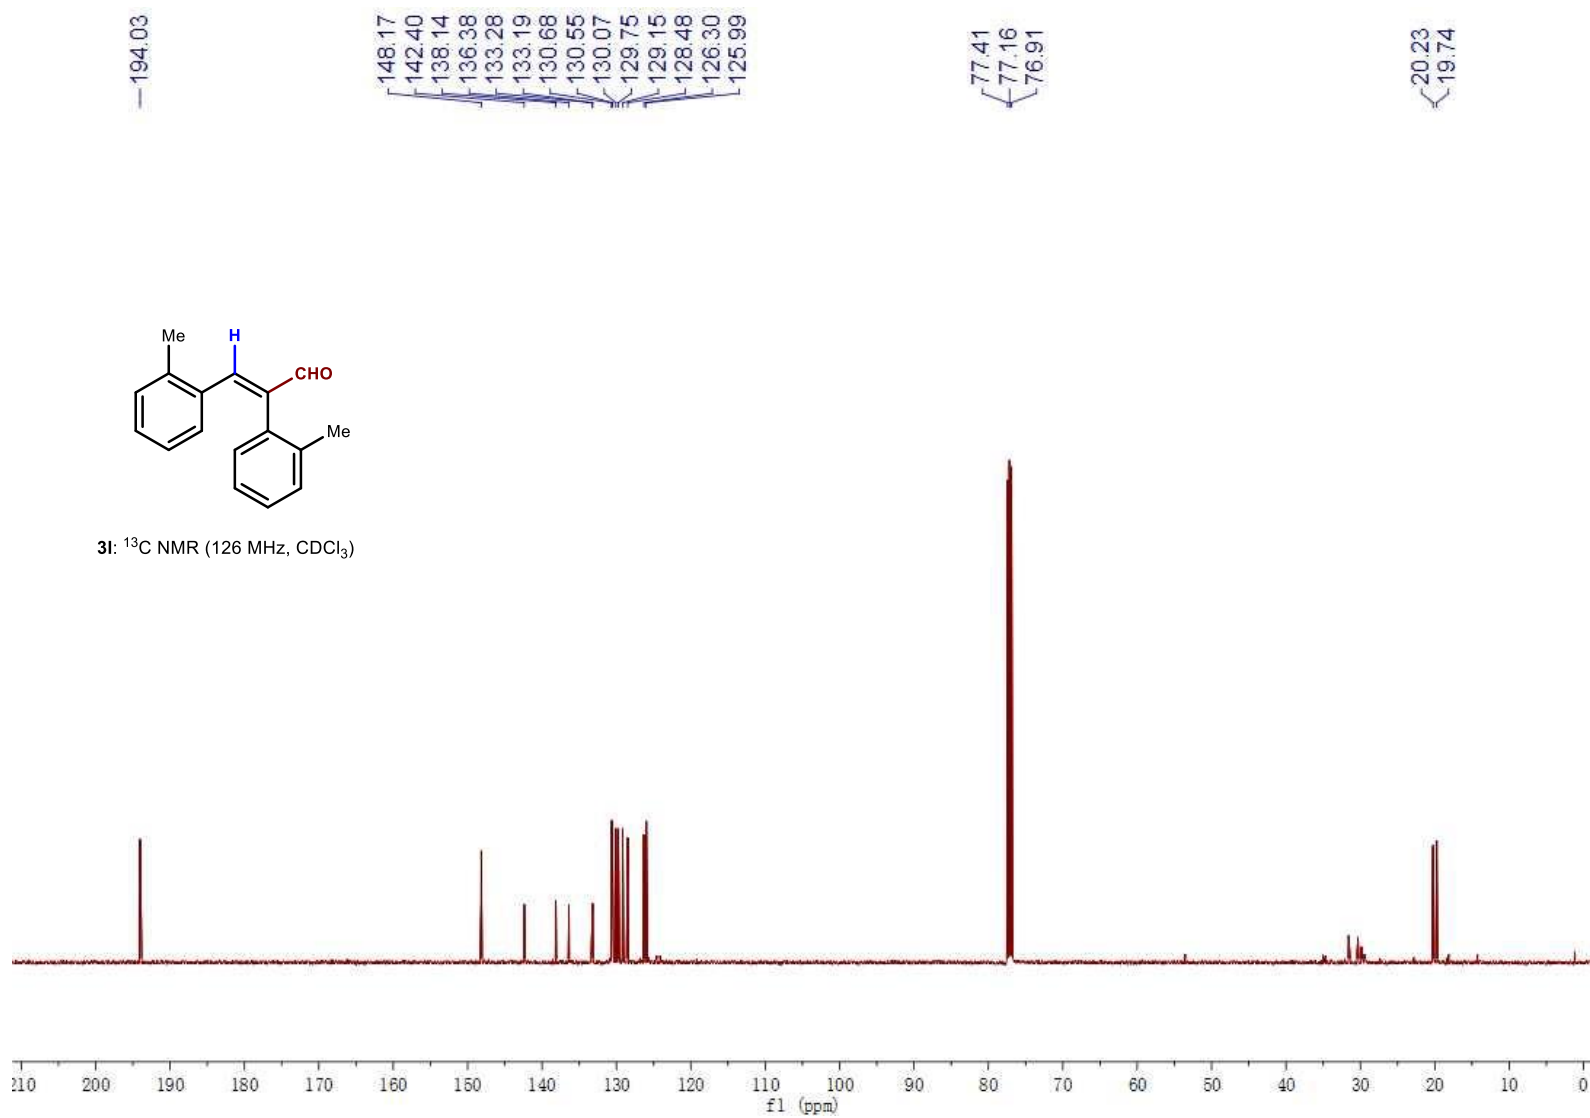

9.83

7.93  
7.46  
7.45  
7.44  
7.44  
7.42  
7.33  
7.33  
7.32  
7.31  
7.30  
7.30  
7.26  
7.26  
7.26  
7.25  
7.25  
7.24  
7.24  
7.23  
7.23  
7.22  
7.22  
7.21  
7.21  
7.07  
7.06  
7.05  
7.05  
6.98  
6.97  
6.95  
6.87  
6.87  
6.86  
6.85

0.00

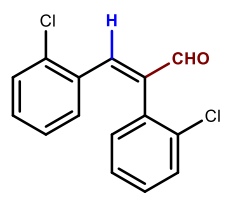

3m: <sup>1</sup>H NMR (500 MHz, CDCl<sub>3</sub>)

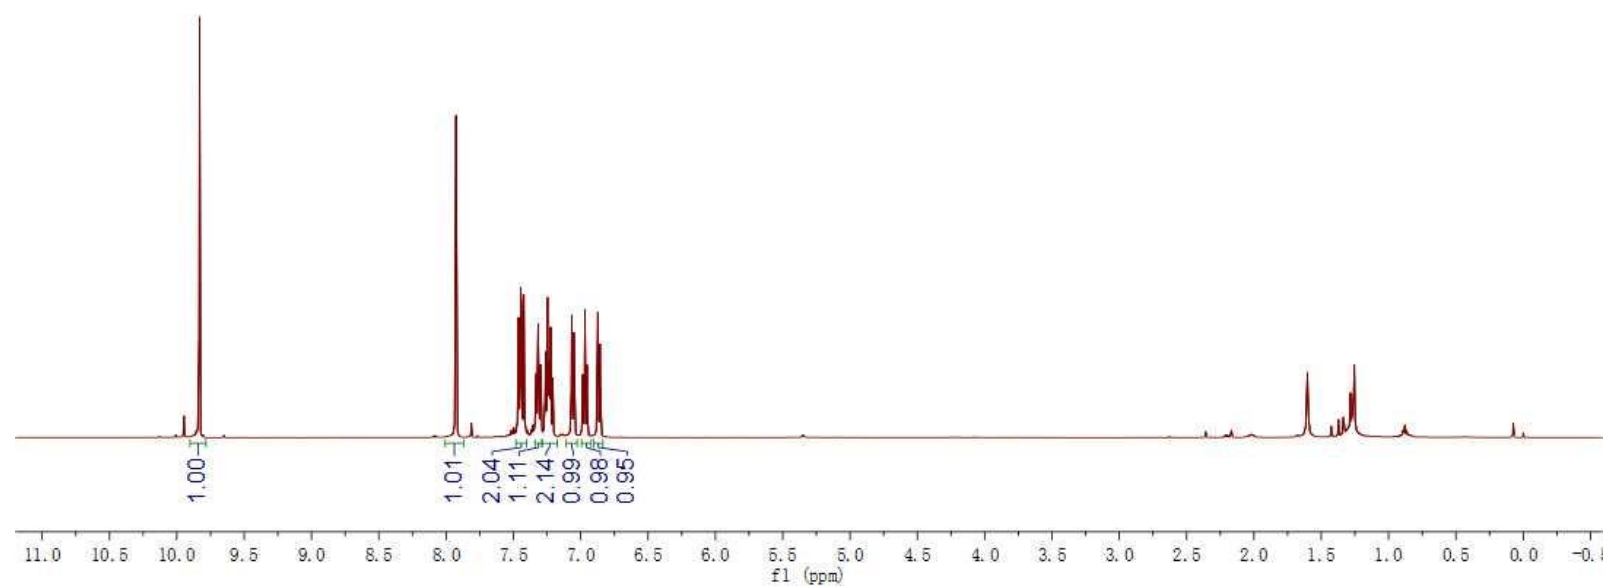

—192.34

146.48  
141.30  
135.23  
133.70  
132.43  
132.20  
131.17  
131.12  
130.21  
129.94  
129.90  
127.21  
126.64

77.31  
77.06  
76.80

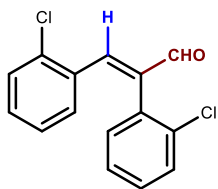

3m:  $^{13}\text{C}$  NMR (126 MHz,  $\text{CDCl}_3$ )

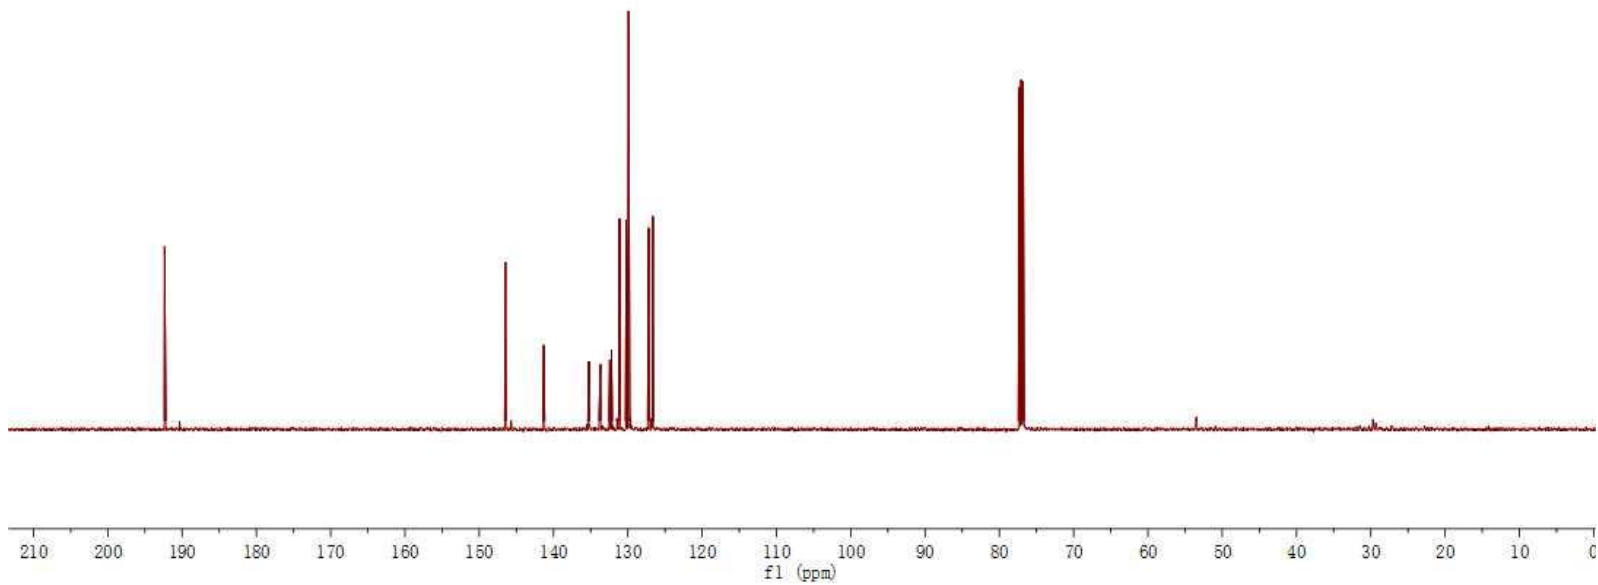

—9.69

7.72  
7.55  
7.54  
7.44  
7.43  
7.38  
7.37  
7.18  
7.17  
7.16  
7.05  
7.05  
7.04  
7.03

—0.00

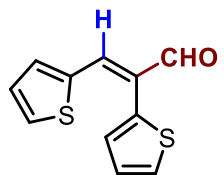

3n: <sup>1</sup>H NMR (500 MHz, CDCl<sub>3</sub>)

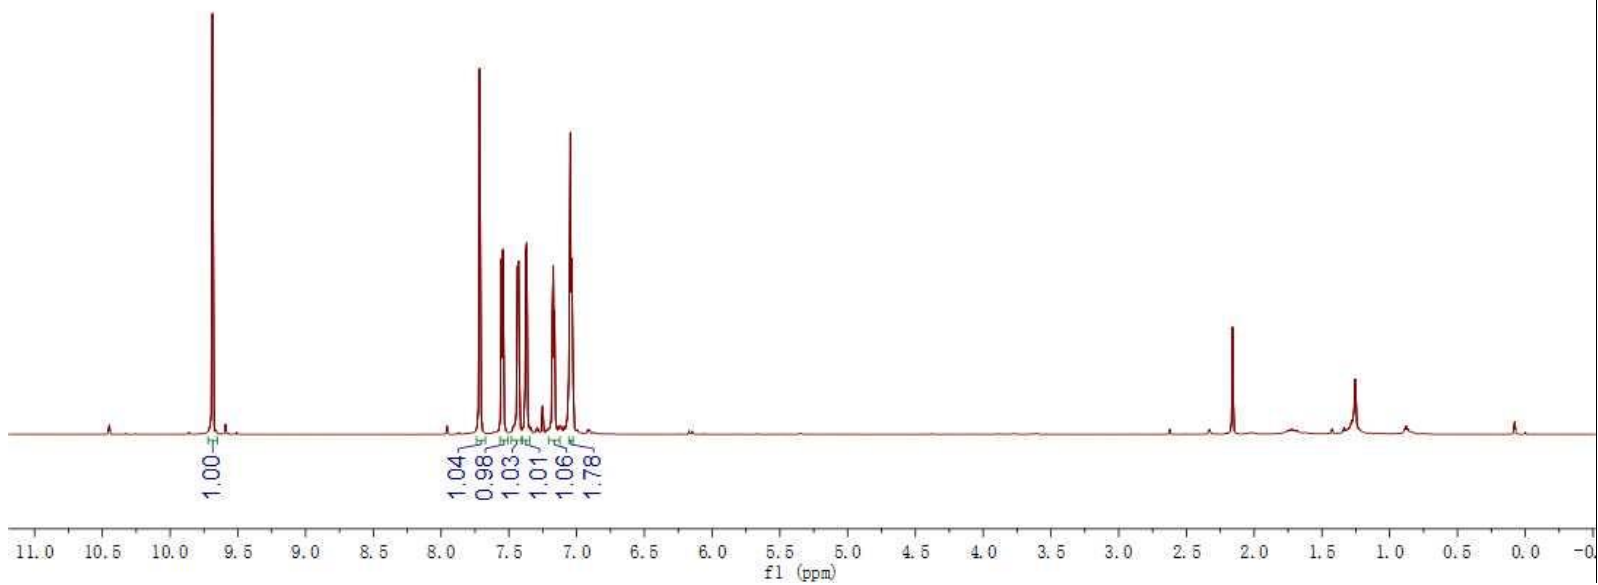

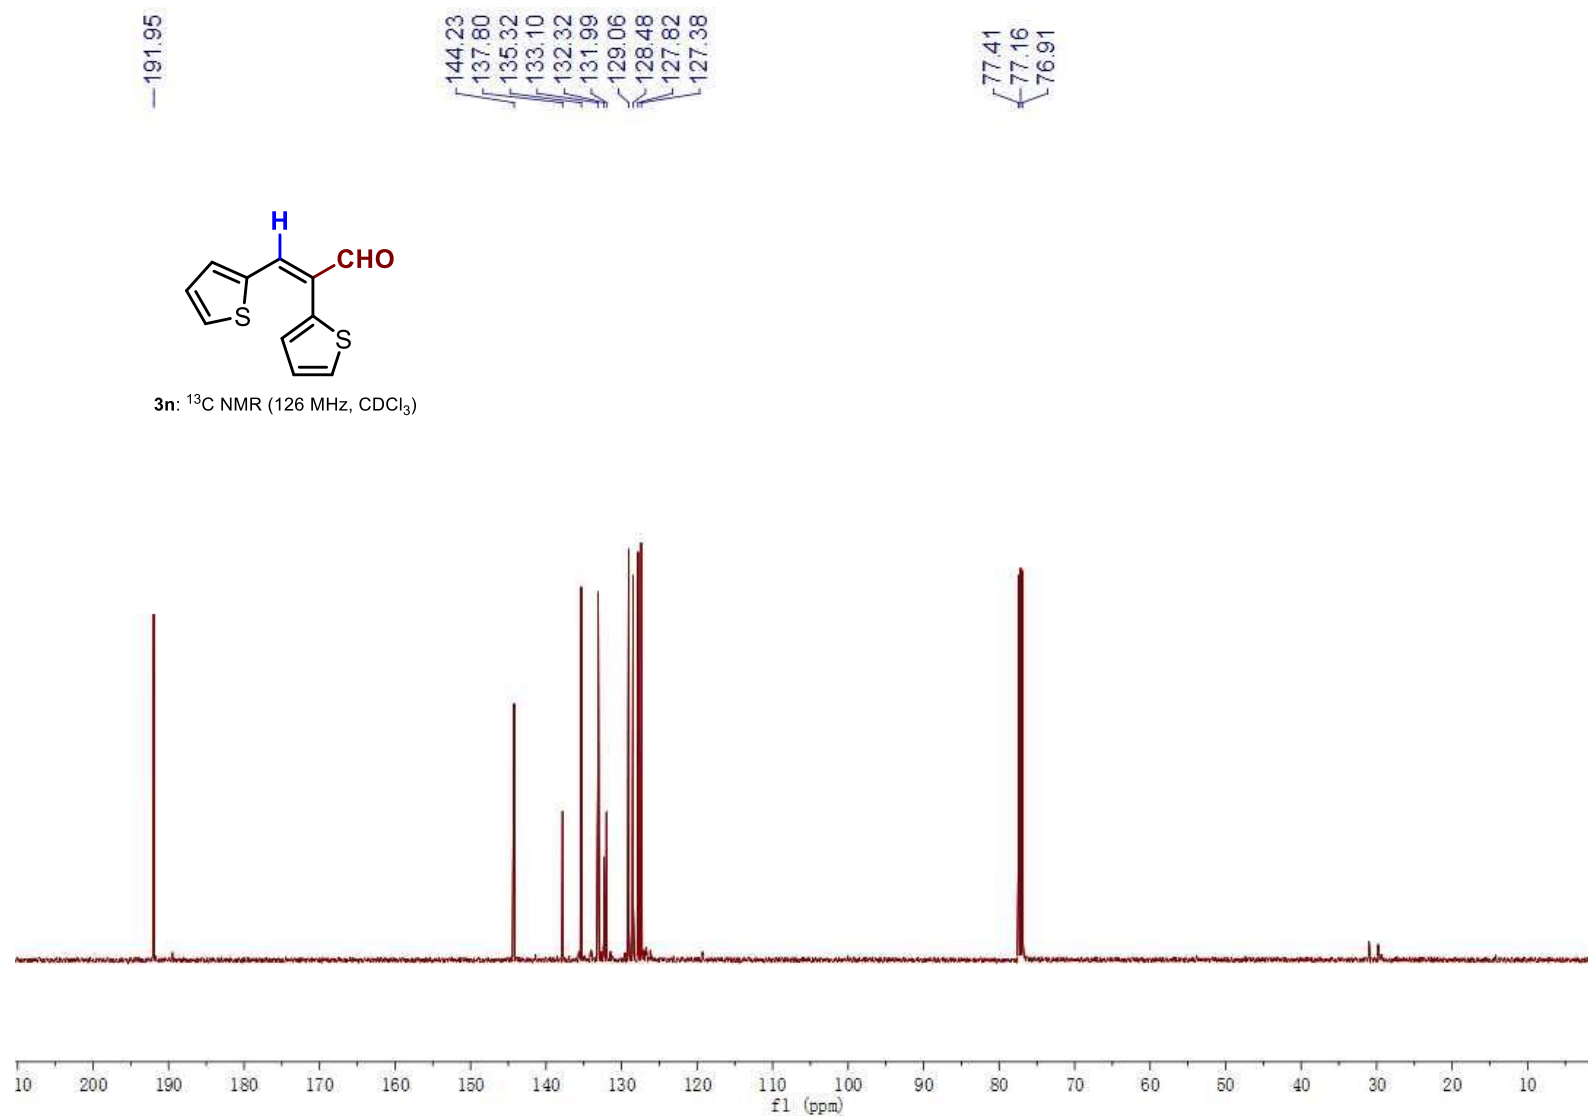

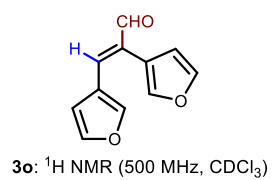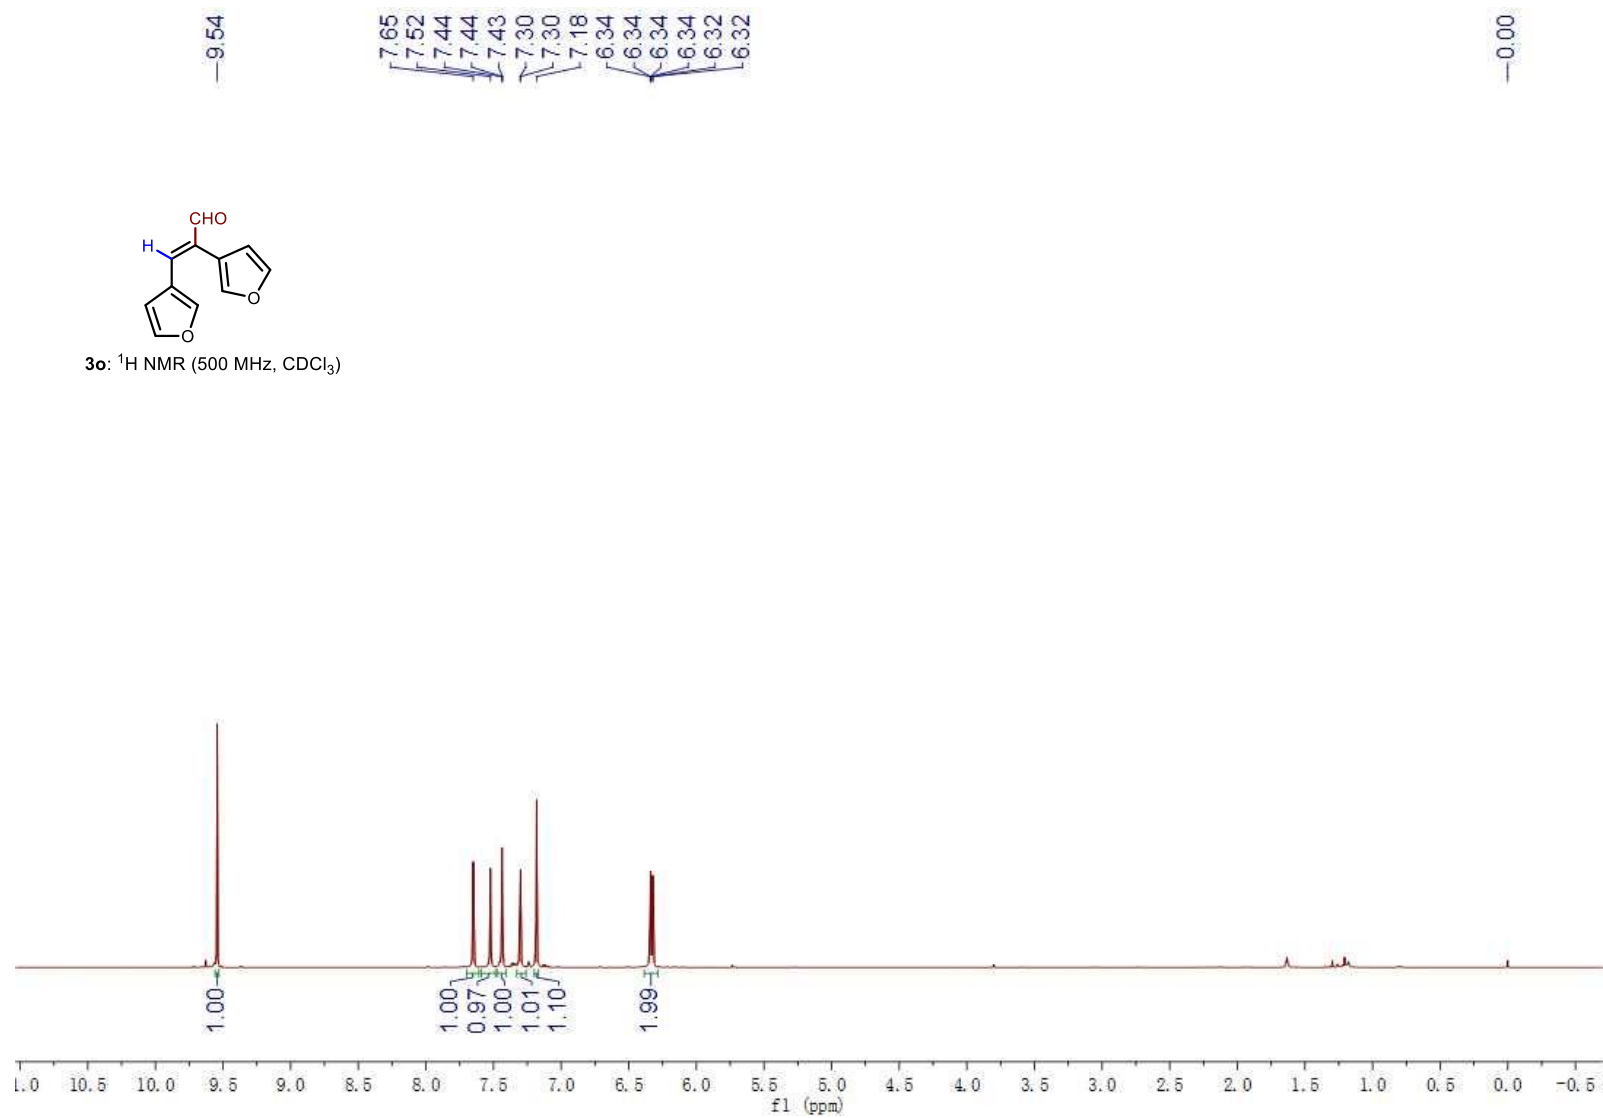



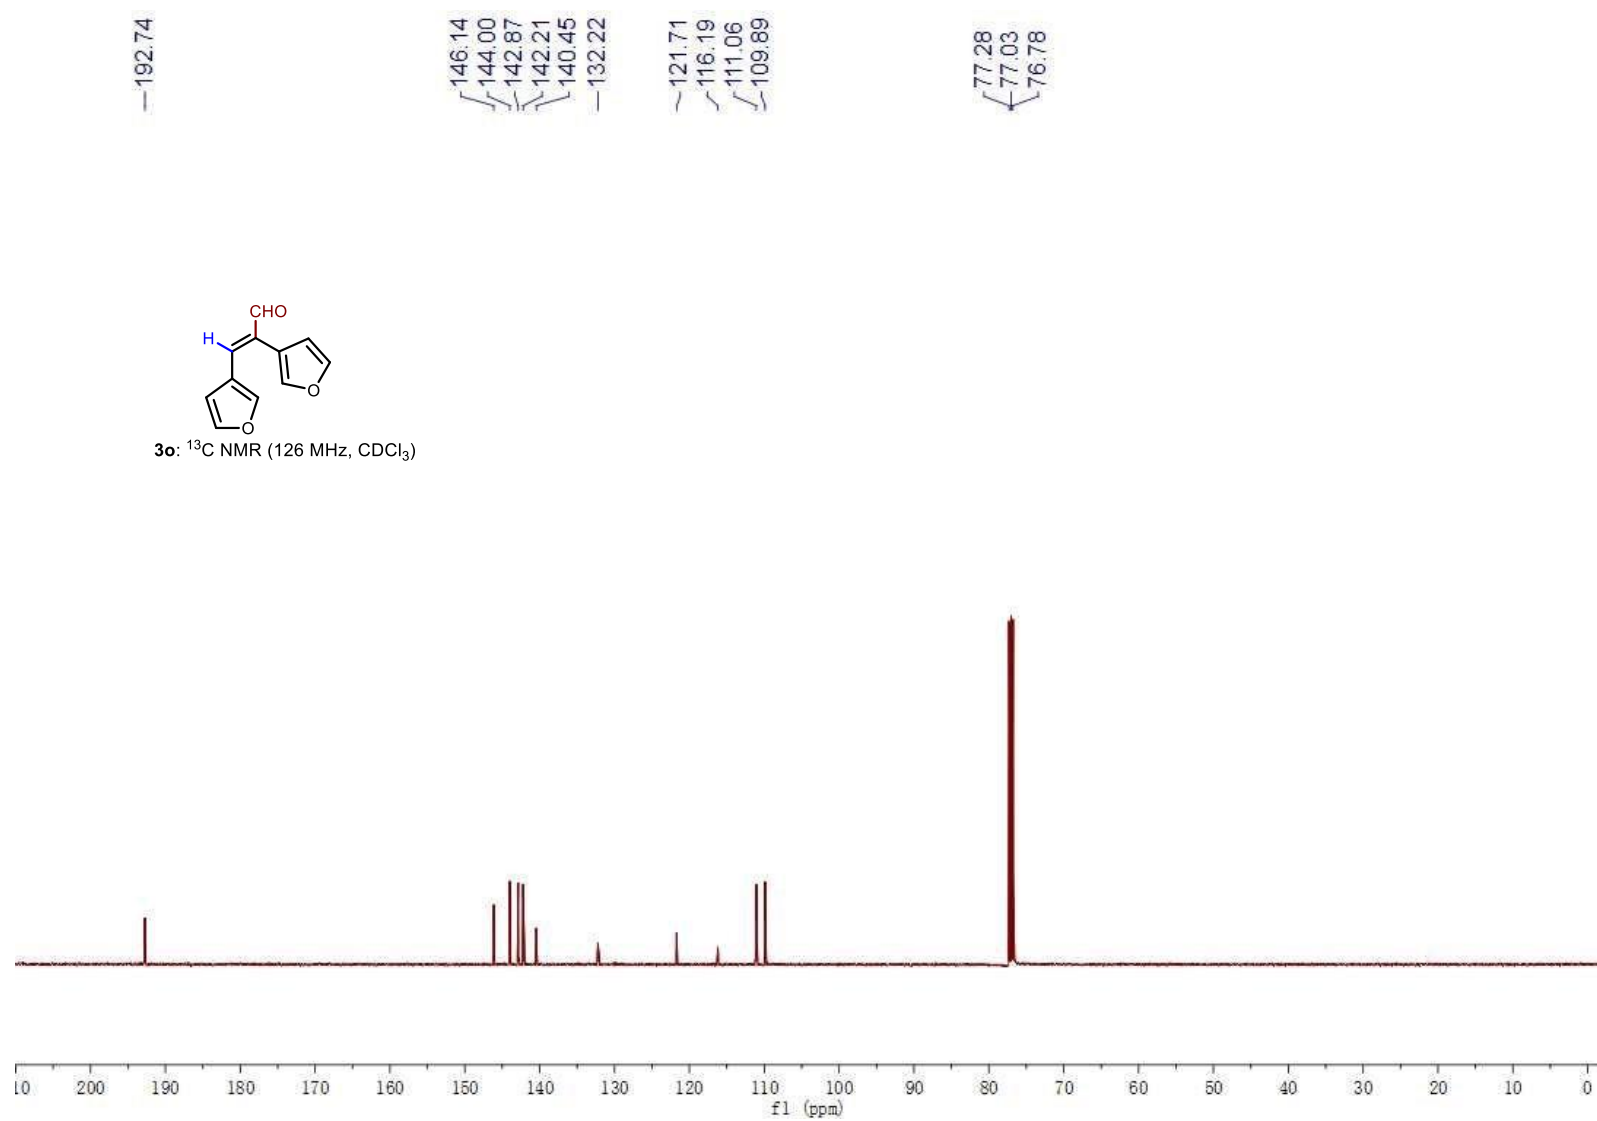

9.62

7.43  
7.41  
7.40  
7.36  
7.35  
7.33  
7.18  
7.16  
6.88  
6.86  
6.85  
6.83

2.02  
2.01

0.00

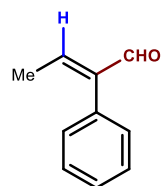

3p: <sup>1</sup>H NMR (500 MHz, CDCl<sub>3</sub>)

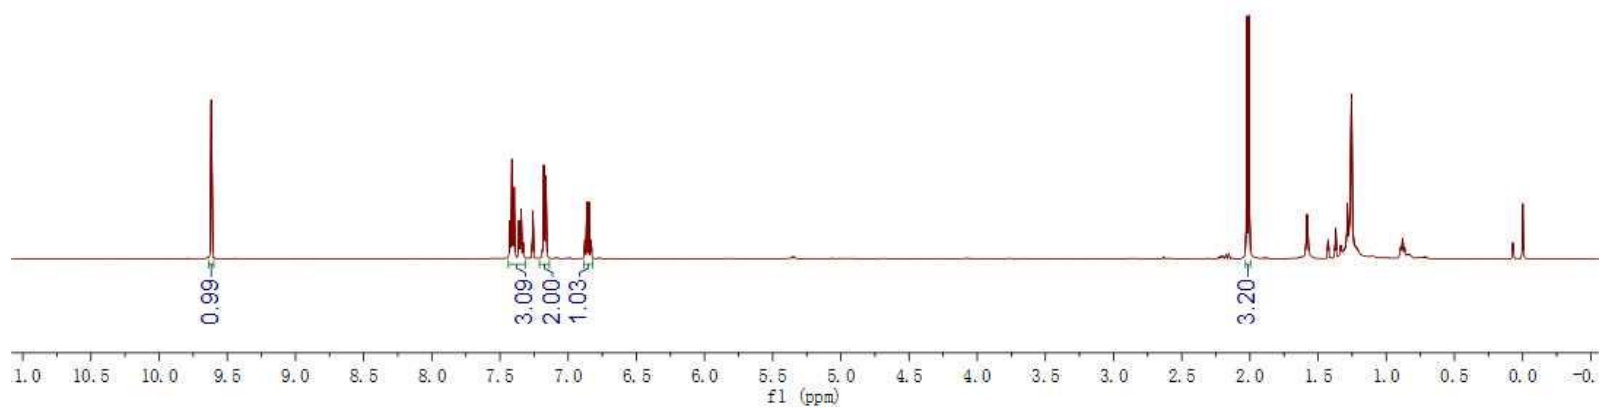

—193.66

—151.37

—145.16

—132.40

—129.61

—128.37

—128.07

—77.41

—77.16

—76.91

—16.10

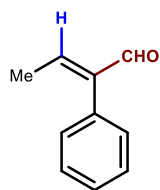

3p: <sup>13</sup>C NMR (126 MHz, CDCl<sub>3</sub>)

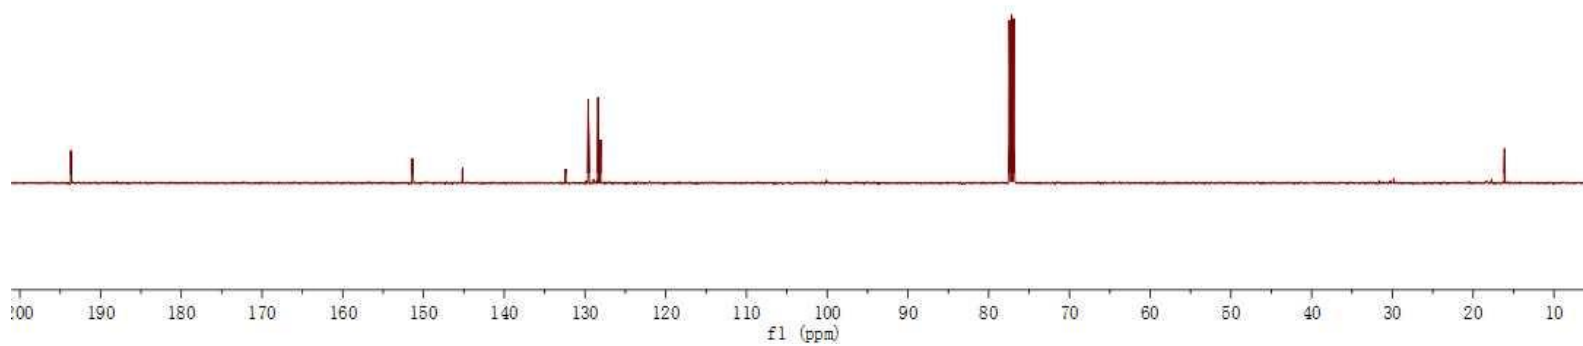

#### 4. NMR spectra of 1,2-di-p-tolyloethan-1-one

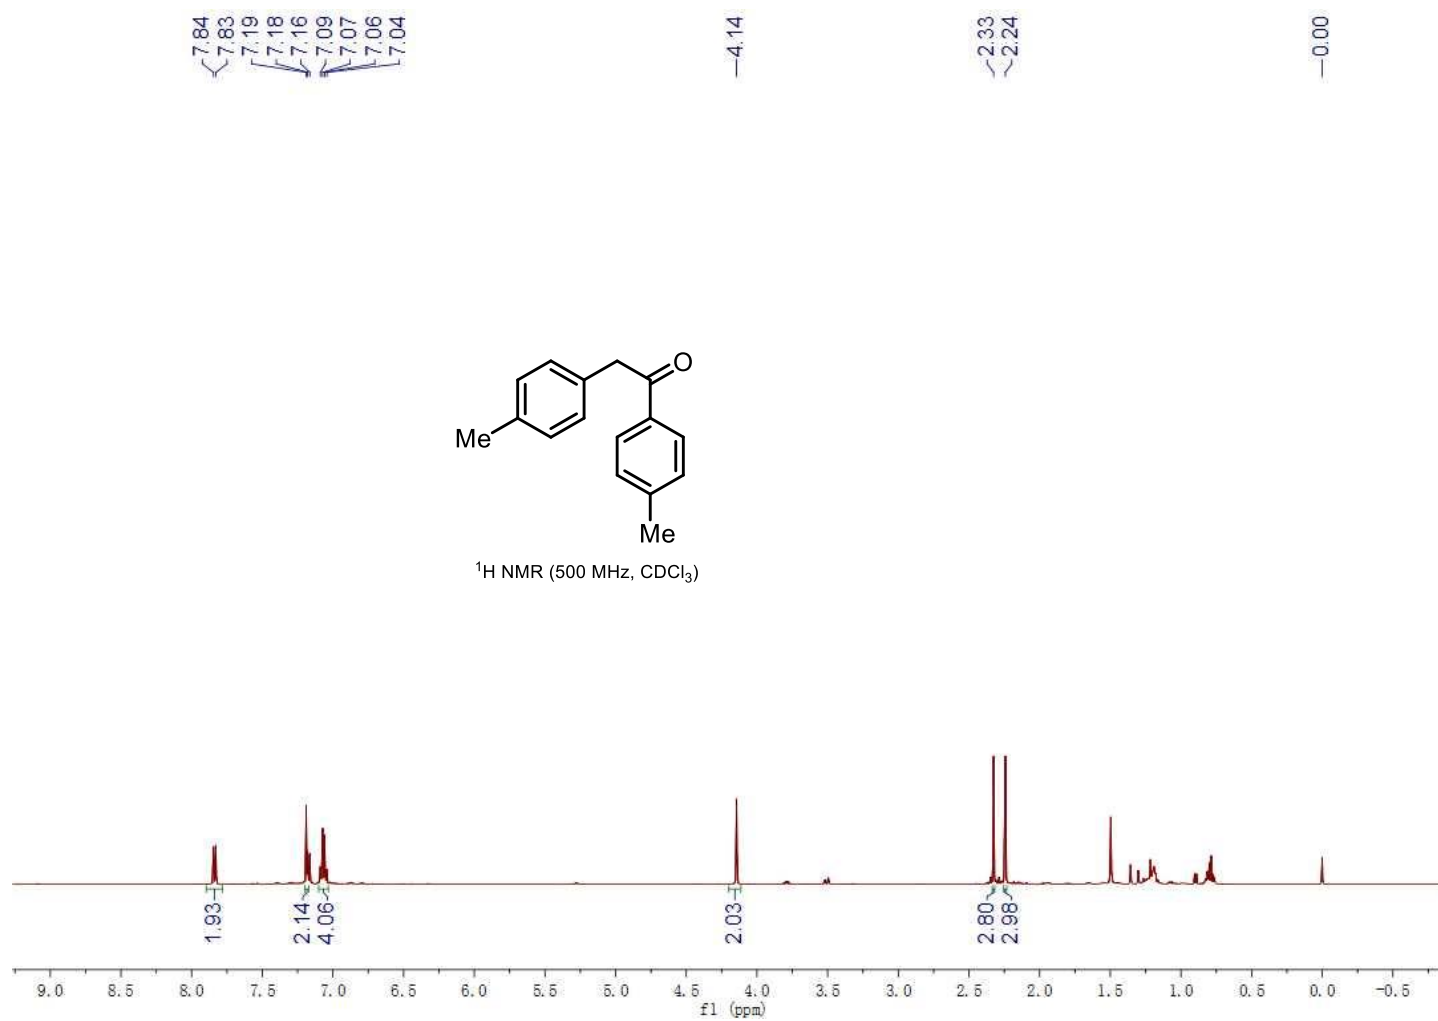

## 5. NMR spectra of the control experimental

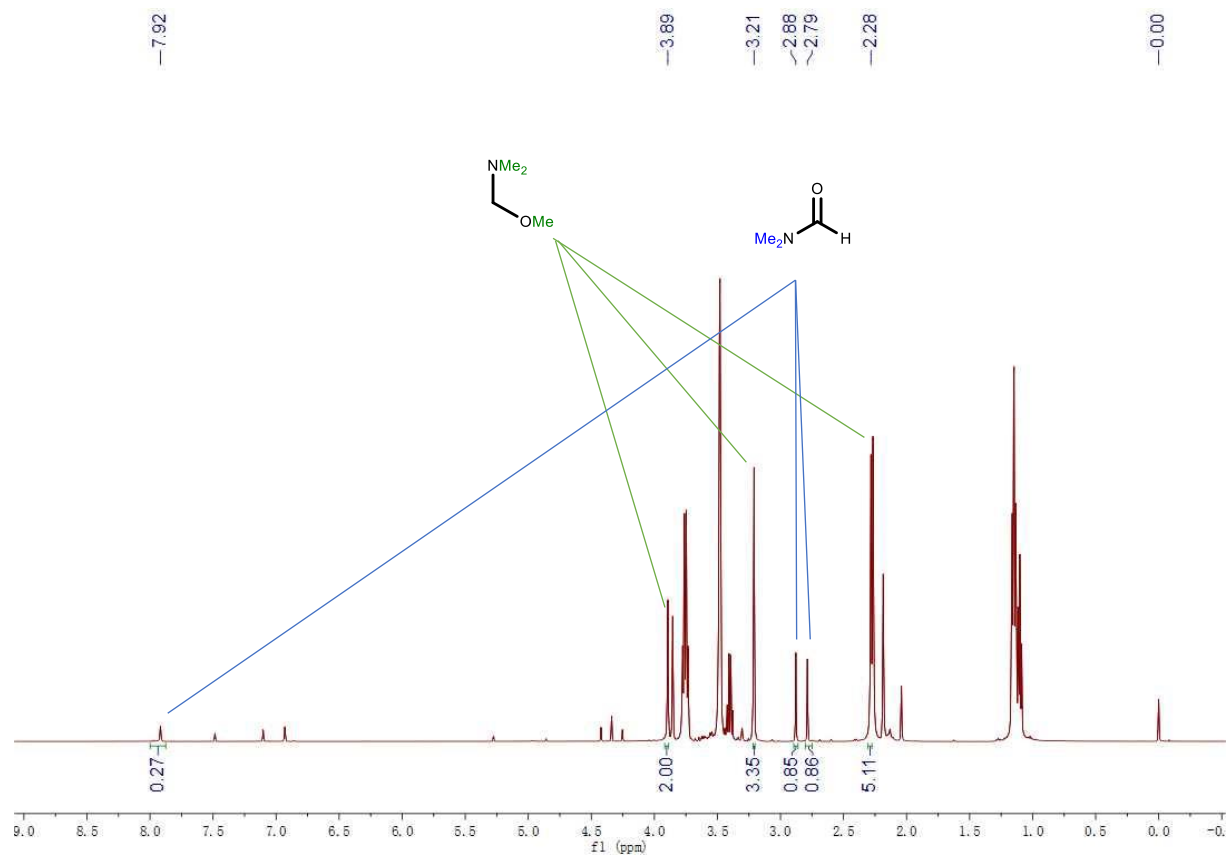

Supplement: d4ob00724g1.pdf [file d4ob00724g1.pdf]
