# Supplementary material for: Copper-catalyzed syn-hydroformylation of alkynes with silanes and N,N-dimethylformamide dimethylacetal
Source: Royal Society of Chemistry journal article supplement (doi:10.1039/d4ob00724g), 2024-01-01
Supplement: d4ob00724g2.pdf [file d4ob00724g2.pdf]

## Graphical Abstract

### Copper-catalyzed *syn*-hydroformylation of alkynes with silanes and *N,N*-dimethylformamide dimethylacetal

Menglin Huai, Long Chen, Wei Dong, Weijie Wang, Zhen Qin, Kaifeng Dai, Yuan Li, Xiulian Zhang and Chuanzhou Tao\*

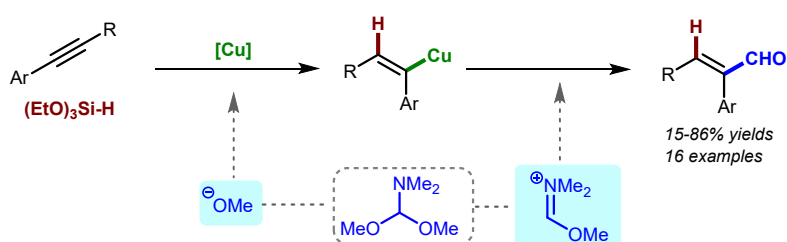

A copper-catalyzed *syn*-hydrocarbonization of internal alkynes with *N,N*-dimethylformamide dimethylacetal and silanes has been disclosed that offers an efficient and expedient access to (*E*)-α,β-unsaturated aldehydes.
